# Supplementary material for: Genetic basis of lacunar stroke: a pooled analysis of individual patient data and genome-wide association studies
Source: PubMed Central journal article supplement (PMC8062914; doi:10.1016/s1474-4422(21)00031-4), 2021-05
Supplement: mmc1.pdf [file mmc1.pdf]

# THE LANCET Neurology

## Supplementary appendix

This appendix formed part of the original submission and has been peer reviewed. We post it as supplied by the authors.

Supplement to: Traylor M, Persyn E, Tomppo L, et al. Genetic basis of lacunar stroke: a pooled analysis of individual patient data and genome-wide association studies. *Lancet Neurol* 2021; published online March 25. [https://doi.org/10.1016/S1474-4422\(21\)00031-4](https://doi.org/10.1016/S1474-4422(21)00031-4).

## Supplementary Data

## Table of Contents

|                                                                                                                                                                                                     |     |
|-----------------------------------------------------------------------------------------------------------------------------------------------------------------------------------------------------|-----|
| Supplementary Table 1 – Sample Characteristics .....                                                                                                                                                | 5   |
| Supplementary Table 2 – Genotyping and Imputation .....                                                                                                                                             | 7   |
| Supplementary Table 2 – Instrumental Variables used in Mendelian Randomization Analysis .....                                                                                                       | 9   |
| Supplementary Table 3 – Pathway Analysis Results From Multi-trait analysis with FDR<0.5.....                                                                                                        | 75  |
| Supplementary Table 4 - Associations of Genome-wide Significant SNPs identified in MEGASTROKE with Lacunar Stroke (Europeans) in this analysis.....                                                 | 77  |
| Supplementary Table 5 - Associations of Genome-wide Significant SNPs identified in MEGASTROKE with Lacunar Stroke (Transethnic) in this analysis .....                                              | 78  |
| Supplementary Table 6 - Association Results for 12 SNPs associated with Lacunar Stroke in this analysis in MEGASTROKE All Stroke (European) Analysis ...                                            | 79  |
| Supplementary Table 7 - Association Results for 12 SNPs associated with Lacunar Stroke in this analysis in MEGASTROKE All Stroke (Transethnic) Analysis                                             | 80  |
| Supplementary Table 8 - Association Results for 12 SNPs associated with Lacunar Stroke in this analysis in MEGASTROKE All Ischaemic Stroke (European) Analysis .....                                | 81  |
| Supplementary Table 9 - Association Results for 12 SNPs associated with Lacunar Stroke in this analysis in MEGASTROKE All Ischaemic Stroke (Transethnic) Analysis .....                             | 82  |
| Supplementary Table 10 – Association Results for 12 SNPs associated with Lacunar Stroke in this analysis in MEGASTROKE Small Vessel Stroke (European) Analysis .....                                | 83  |
| Supplementary Table 11 - Association Results for 12 SNPs associated with Lacunar Stroke in this analysis in MEGASTROKE Small Vessel Stroke (Transethnic) Analysis .....                             | 84  |
| Supplementary Table 12 – Full Results for 12 Associated Loci, Including BMASS Results .....                                                                                                         | 85  |
| Supplementary Table 13 – Association Statistics for 12 Variants Associated with Lacunar Stroke from MRI Confirmed and Standard Phenotyping Groups Separately in European ancestry individuals ..... | 86  |
| OR, Odds Ratio; SE, standard error; OR Ratio, Ratio of Odds Ratios between MRI Confirmed and Standard Phenotyping groups.....                                                                       | 86  |
| Supplementary Table 14 – Associations of Genome-wide Significant Variants identified in this analysis with Epigenetic markers from Genome wide Association Studies reaching $p < 5e-8$ .....        | 87  |
| Description of Study Populations.....                                                                                                                                                               | 99  |
| Supplementary Figures 1-2. QQ-plots of Observed against Expected $-\log_{10}(p\text{-values})$ for European (Left) and Transethnic (Right) Genome-wide Analyses .....                               | 115 |
| Supplementary Figure 3. SPI1-SLC39A13-PSMC3-RAPSN Region in European (left) and Transethnic (right) analysis.....                                                                                   | 116 |
| Supplementary Figure 4. ICA1L-WDR12-CARF-NBEAL1 Region in European (left) and Transethnic (right) analysis .....                                                                                    | 117 |
| Supplementary Figure 5. ZCCHC14 Region in European (left) and Transethnic (right) analysis.....                                                                                                     | 118 |
| .....                                                                                                                                                                                               | 118 |

|                                                                                                                                 |     |
|---------------------------------------------------------------------------------------------------------------------------------|-----|
| Supplementary Figure 6. ULK4 Region in European (left) and Transethnic (right) analysis .....                                   | 119 |
| .....                                                                                                                           | 119 |
| Supplementary Figure 7. ZBTB14-EPB41L3 Region in European (left) and Transethnic (right) analysis.....                          | 120 |
| Supplementary Figures 8-11. Regions achieving genome-wide significance in multi-trait analysis .....                            | 121 |
| Supplementary Figures 12-15. Regions achieving genome-wide significance in multi-trait analysis .....                           | 122 |
| .....                                                                                                                           | 122 |
| .....                                                                                                                           | 122 |
| Supplementary Figures 16-17. Regions achieving genome-wide significance in multi-trait analysis .....                           | 123 |
| .....                                                                                                                           | 123 |
| .....                                                                                                                           | 123 |
| Supplementary Figure 18 – Forest Plot for Association of rs72934535 at ICA1L-WDR12-CARF-NBEAL1 locus.....                       | 124 |
| Supplementary Figure 19 – Forest Plot for Association of rs9958650 at ZBTB14-EPB41L3 locus .....                                | 125 |
| Supplementary Figure 20 – Forest Plot for Association of rs12445022 at ZCCHC14 locus .....                                      | 126 |
| Supplementary Figure 21 – Forest Plot for Association of rs2293576 at SPI1-SLC39A13-PSMC3-RAPSN locus .....                     | 127 |
| Supplementary Figure 22 – Forest Plot for Association of rs4621303 at ULK4 locus.....                                           | 128 |
| Supplementary Figure 23 – Forest Plot for Association of rs2984613 at SLC25A44-PMF1-BGLAP locus .....                           | 129 |
| Supplementary Figure 24 – Forest Plot for Association of rs2303655 at LOX-LOC10058541-ZNF474 locus .....                        | 130 |
| Supplementary Figure 25 – Forest Plot for Association of rs12524544 at FOXF2-FOXQ1 locus .....                                  | 131 |
| Supplementary Figure 26 – Forest Plot for Association of rs225744 at GPR126-VTA1 locus .....                                    | 132 |
| Supplementary Figure 27 – Forest Plot for Association of rs79043147 at HTRA1/ARMS2 locus .....                                  | 133 |
| Supplementary Figure 28 – Forest Plot for Association of rs11838776 at COL4A2 locus.....                                        | 134 |
| Supplementary Figure 29 - Forest Plot for Association of rs61000833 at SH3PXD2A locus .....                                     | 135 |
| Supplementary Figure 30 – Mendelian Randomization Results for Causal Impact of Body Mass Index on Lacunar Stroke .....          | 136 |
| .....                                                                                                                           | 136 |
| .....                                                                                                                           | 136 |
| Supplementary Figure 31 – Mendelian Randomization Results for Causal Impact of Diastolic Blood Pressure on Lacunar Stroke ..... | 137 |
| .....                                                                                                                           | 137 |

|                                                                                                                                        |            |
|----------------------------------------------------------------------------------------------------------------------------------------|------------|
| <b>Supplementary Figure 32 – Mendelian Randomization Results for Causal Impact of High Density Lipoprotein on Lacunar Stroke .....</b> | <b>138</b> |
| <b>.....</b>                                                                                                                           | <b>138</b> |
| <b>Supplementary Figure 33 – Mendelian Randomization Results for Causal Impact of Low Density Lipoprotein on Lacunar Stroke .....</b>  | <b>139</b> |
| <b>.....</b>                                                                                                                           | <b>139</b> |
| <b>Supplementary Figure 34 – Mendelian Randomization Results for Causal Impact of Pulse Pressure on Lacunar Stroke .....</b>           | <b>140</b> |
| <b>.....</b>                                                                                                                           | <b>140</b> |
| <b>Supplementary Figure 35 – Mendelian Randomization Results for Causal Impact of Systolic Blood Pressure on Lacunar Stroke .....</b>  | <b>141</b> |
| <b>.....</b>                                                                                                                           | <b>141</b> |
| <b>Supplementary Figure 36 – Mendelian Randomization Results for Causal Impact of Ever Smoking on Lacunar Stroke .....</b>             | <b>142</b> |
| <b>.....</b>                                                                                                                           | <b>142</b> |
| <b>Supplementary Figure 37 – Mendelian Randomization Results for Causal Impact of Triglycerides on Lacunar Stroke .....</b>            | <b>143</b> |
| <b>.....</b>                                                                                                                           | <b>143</b> |
| <b>.....</b>                                                                                                                           | <b>143</b> |
| <b>Supplementary Figure 38 – Mendelian Randomization Results for Causal Impact of Type 2 Diabetes on Lacunar Stroke .....</b>          | <b>144</b> |
| <b>UK DNA Lacunar 2 Stroke Study Investigators .....</b>                                                                               | <b>145</b> |
| <b>UK DNA Lacunar Stroke Study Investigators .....</b>                                                                                 | <b>147</b> |
| <b>The Dutch Parelsnoer Institute-Cerebrovascular accident (CVA) Study Group, The Netherlands .....</b>                                | <b>148</b> |
| <b>Members of the Stroke Genetics Network (SiGN) .....</b>                                                                             | <b>149</b> |
| <b>Membership of The International Stroke Genetics Consortium .....</b>                                                                | <b>153</b> |

**Supplementary Table 1 – Sample Characteristics**

| Study                                                                                              | N cases     | N controls   | Cases  |               | Controls |               | Genomic Inflation lambda |
|----------------------------------------------------------------------------------------------------|-------------|--------------|--------|---------------|----------|---------------|--------------------------|
|                                                                                                    |             |              | % Male | Mean Age (SD) | % Male   | Mean Age (SD) |                          |
| <i>MRI Confirmed</i>                                                                               |             |              |        |               |          |               |                          |
| DNA Lacunar                                                                                        | 911         | 977          | 70     | 57 (10)       | 53       | 60 (4)        |                          |
| SGUL Stroke Register, GENESIS, Cambridge BioResource                                               | 302         |              | 62     | 68 (12)       |          |               |                          |
| DNA Lacunar 2                                                                                      | 296         |              | 62     | 66 (12)       |          |               |                          |
| Leuven Stroke Genetics Study                                                                       | 27          |              | 63     | 69 (12)       |          |               |                          |
| Edinburgh Mild Stroke Study                                                                        | 34          |              | 58     | 66 (11)       |          |               | 1.037                    |
| PRESERVE                                                                                           | 44          |              | 51     | 68 (9)        |          |               |                          |
| OXVASC                                                                                             | 37          |              | 59     | 63 (13)       |          |               |                          |
| MGH                                                                                                | 32          |              | 70     | 68 (15)       |          |               |                          |
| Understanding Society                                                                              |             | 9194         |        |               | 44       | NA*           |                          |
| NINDS-SIGN (Graz, SAHLISIS, GEOS, SPS3, BASICMAR, MIAMISR, Leuven, Krakow, GCNKSS, GASROS, BRAINS) | 610         |              | 68     | 63 (12)       |          |               |                          |
| Milano                                                                                             | 9           |              | 67     | 55 (16)       |          |               | 1.016                    |
| Australian Stroke Genetics Collaborative                                                           | 23          |              | 57     | 66 (11)       |          |               |                          |
| WTCCC2 (UK & Germany)                                                                              | 287         |              | 47     | 69 (11)       |          |               |                          |
| WTCCC2, SIGN, ASGC                                                                                 |             | 17554        |        |               | 49       | 62 (17)*      |                          |
| SLESS, DNA LACUNAR 2 (African ancestry)                                                            | 141         | 434          | 56     | 66 (10)       | 47       | 59 (12)       | 0.978                    |
| SIGN (African ancestry)                                                                            | 179         | 1190         | 54     | 58 (9)        | 38       | 60 (13)       | 1.018                    |
| DNA LACUNAR 2 (South Asian ancestry)                                                               | 55          |              | 65     | 63 (13)       |          |               | 0.756                    |
| UK Biobank (South Asian ancestry)                                                                  |             | 191          |        |               | 62       | 59 (9)        |                          |
| <b>Total (MRI Confirmed)</b>                                                                       | <b>2987</b> | <b>29540</b> |        |               |          |               |                          |
| <i>Standard Phenotyping</i>                                                                        |             |              |        |               |          |               |                          |

|                                                                                                                                                                                                      |             |               |    |         |    |         |       |
|------------------------------------------------------------------------------------------------------------------------------------------------------------------------------------------------------|-------------|---------------|----|---------|----|---------|-------|
| Australian Stroke Genetics Collaborative                                                                                                                                                             | 229         | 600           | 57 | 72 (13) | 50 | 66 (8)  | 1.010 |
| Barcelona                                                                                                                                                                                            | 163         | 198           | 68 | 66 (13) | 46 | 68 (7)  | 1.058 |
| Germany-WTCCC2                                                                                                                                                                                       | 69          | 402           | 71 | 67 (13) | 51 | NA*     | 1.019 |
| NINDS-SIGN-group1 (BRAINS, MGH-GASROS, ISGS, SWISS, HABC)                                                                                                                                            | 116         | 793           | 54 | 72 (13) | 54 | 74 (3)  | 1.018 |
| NINDS-SIGN-group3,4,5,6,7,9 (GEOS, BRAINS, MGH-GASROS, GCNKSS, ISGS, MCISS, MIAMISR, NHS, NOMAS, REGARDS, SPS3, SWISS, WHI, WUSTL, HRS, OAI, Krakow, LSGS, BASICMAR, ADHD, INMA, SAHLISIS, LSR, MDC) | 840         | 8043          |    |         | 46 | 61 (19) | 1.036 |
| Utrecht (Dutch Parelinoer Study)                                                                                                                                                                     | 229         |               | 53 | 67 (13) |    |         |       |
| NINDS-SIGN-group8 (Graz)                                                                                                                                                                             | 32          | 407           | 56 | 67 (12) |    |         |       |
| UK-WTCCC2                                                                                                                                                                                            | 225         | 2584          | 53 | 69 (13) | 43 | 65 (8)  | 1.031 |
| WTCCC2-ImmunoChip                                                                                                                                                                                    | 332         | 4594          | 38 | 69 (13) | 50 | NA*     | 1.009 |
| Geisinger MyCode                                                                                                                                                                                     | 196         | 624           | 55 | 70 (13) | 42 | NA*     | 1.099 |
| deCODE                                                                                                                                                                                               | 628         | 198602        | 46 | 67 (12) | 46 | 66 (12) | 1.004 |
| Helsinki Ischemic Stroke Genetics Study                                                                                                                                                              | 161         | 3367          | 62 | 68 (12) | 50 | 60 (16) | 1.015 |
| Sahlgrenska Academy Study on Ischemic Stroke (SAHLISIS)                                                                                                                                              | 198         | 990           | 57 | 65 (11) | 44 | 61 (14) | 1.007 |
|                                                                                                                                                                                                      |             |               | 60 | 58 (8)  | 66 | 56 (11) | 1.006 |
| SLESS (African ancestry)                                                                                                                                                                             | 178         | 434           | 44 | 66 (10) | 53 | 59 (12) | 1.024 |
| SIGN (African ancestry) (GEOS, MGH-GASROS, GCNKSS, ISGS, MCISS, MIAMISR, NOMAS, OAI, REGARDS, SPS3, SWISS, WHI, WUSTL, HRS)                                                                          | 200         | 1192          | 63 | 60 (13) | 59 | 58 (13) | 1.009 |
| SIGN (Hispanic ancestry) (BRAINS, MGH-GASROS, GCNKSS, ISGS, MCISS, MIAMISR, NOMAS, NHS, REGARDS, SPS3, SWISS, WHI, WUSTL, HRS, HCHS/SOL, Krakow, LSGS, BASICMAR, SAHLISIS, LSR, MDC)                 | 555         | 2428          | NA | NA      | NA | NA      | 0.998 |
| <b>Total (not MRI Confirmed)</b>                                                                                                                                                                     | <b>4351</b> | <b>225258</b> |    |         |    |         |       |
| <b>Total</b>                                                                                                                                                                                         | <b>7338</b> | <b>254798</b> |    |         |    |         |       |

\* age not available in WTCCC2 and Understanding Society controls

**Supplementary Table 2 – Genotyping and Imputation**

| <b>Study</b>                                                | <b>Genotyping platforms - SNP panel</b>                    | <b>Sample call rate</b> | <b>SNP call rate</b> | <b>MAF</b> | <b>HWE p-value</b> | <b>Imputation reference panel</b> |
|-------------------------------------------------------------|------------------------------------------------------------|-------------------------|----------------------|------------|--------------------|-----------------------------------|
| DNA Lacunar Stroke Register, GENESIS, Cambridge BioResource | Illumina HumanCoreExome                                    | > 97%                   | > 97%                | <0.01      | < 10-6             | 1000 Genomes Phase 3 (ALL)        |
| DNA Lacunar 2                                               | Illumina HumanCoreExome                                    | > 97%                   | > 97%                | <0.01      | < 10-6             | 1000 Genomes Phase 3 (ALL)        |
| Leuven Stroke Genetics Study                                | Illumina HumanCoreExome                                    | > 97%                   | > 97%                | <0.01      | < 10-6             | 1000 Genomes Phase 3 (ALL)        |
| Edinburgh Mild Stroke Study                                 | Illumina HumanCoreExome                                    | > 97%                   | > 97%                | <0.01      | < 10-6             | 1000 Genomes Phase 3 (ALL)        |
| PRESERVE                                                    | Illumina HumanCoreExome                                    | > 97%                   | > 97%                | <0.01      | < 10-6             | 1000 Genomes Phase 3 (ALL)        |
| OXVASC                                                      | Illumina HumanCoreExome                                    | > 97%                   | > 97%                | <0.01      | < 10-6             | 1000 Genomes Phase 3 (ALL)        |
| MGH                                                         | Illumina HumanCoreExome                                    | > 97%                   | > 97%                | <0.01      | < 10-6             | 1000 Genomes Phase 3 (ALL)        |
| Understanding Society                                       | Illumina HumanCoreExome                                    |                         |                      |            |                    | 1000 Genomes Phase 3 (ALL)        |
| Milano                                                      | Illumina Human610-Quad v1_B and Human660W-Quad v1_A chips. | > 95%                   | > 95%                | <0.01      | < 10-5             | Haplotype Reference Consortium    |
| SLESS                                                       | Illumina Multi-Ethnic-Genotyping-Array                     | > 97%                   | > 97%                | <0.005     | < 10-6             | Haplotype Reference Consortium    |
| NINDS-SIGN -all studies                                     | Illumina HumanOmni5Exome-4v1                               | >95%                    | > 99%                | < 0.01     | <10-3              | Haplotype Reference Consortium    |
| NINDS-SIGN-BRAINS                                           | Illumina 650Q                                              | >95%                    | > 99%                | < 0.01     | <10-3              | Haplotype Reference Consortium    |
| NINDS-SIGN-GASROS                                           | Illumina610                                                | >95%                    | > 99%                | < 0.01     | <10-3              | Haplotype Reference Consortium    |
| NINDS-SIGN-ISGS                                             | Illumina610                                                | >95%                    | > 99%                | < 0.01     | <10-3              | Haplotype Reference Consortium    |
| NINDS-SIGN-SWISS                                            | Illumina610                                                | >95%                    | > 99%                | < 0.01     | <10-3              | Haplotype Reference Consortium    |
| NINDS-SIGN-ESS                                              | Illumina660                                                | >95%                    | > 99%                | < 0.01     | <10-3              | Haplotype Reference Consortium    |
| NINDS-SIGN-MUNICH                                           | Illumina660                                                | >95%                    | > 99%                | < 0.01     | <10-3              | Haplotype Reference Consortium    |
| NINDS-SIGN-OXVASC                                           | Illumina660                                                | >95%                    | > 99%                | < 0.01     | <10-3              | Haplotype Reference Consortium    |
| NINDS-SIGN-STGEORGE                                         | Illumina660                                                | >95%                    | > 99%                | < 0.01     | <10-3              | Haplotype Reference Consortium    |
| NINDS-SIGN-KORA                                             | Illumina550                                                | >95%                    | > 99%                | < 0.01     | <10-3              | Haplotype Reference Consortium    |
| NINDS-SIGN-WTCCC                                            | Illumina 660                                               | >95%                    | > 99%                | < 0.01     | <10-3              | Haplotype Reference Consortium    |
| NINDS-SIGN-GEOS                                             | Illumina 1M                                                | >95%                    | > 99%                | < 0.01     | <10-3              | Haplotype Reference Consortium    |
| NINDS-SIGN-CIDR*                                            | Illumina 5M                                                | >95%                    | > 99%                | < 0.01     | <10-3              | Haplotype Reference Consortium    |
| NINDS-SIGN-OAI                                              | Illumina 2.5M                                              | >95%                    | > 99%                | < 0.01     | <10-3              | Haplotype Reference Consortium    |
| NINDS-SIGN-KRAKOW                                           | Illumina 5M                                                | >95%                    | > 99%                | < 0.01     | <10-3              | Haplotype Reference Consortium    |
| NINDS-SIGN-LSGS                                             | Illumina 5M                                                | >95%                    | > 99%                | < 0.01     | <10-3              | Haplotype Reference Consortium    |
| NINDS-SIGN-BASICMAR                                         | Illumina 5M                                                | >95%                    | > 99%                | < 0.01     | <10-3              | Haplotype Reference Consortium    |
| NINDS-SIGN-GRAZ                                             | Illumina 5M                                                | >95%                    | > 99%                | < 0.01     | <10-3              | Haplotype Reference Consortium    |



|                                                           |                                               |       |       |                         |                                   |                                |
|-----------------------------------------------------------|-----------------------------------------------|-------|-------|-------------------------|-----------------------------------|--------------------------------|
| NINDS-SIGN-SAHLSIS                                        | Illumina 5M                                   | >95%  | > 99% | < 0.01                  | <10-3                             | Haplotype Reference Consortium |
| NINDS-SIGN-LSR                                            | Illumina 5M                                   | >95%  | > 99% | < 0.01                  | <10-3                             | Haplotype Reference Consortium |
| NINDS-SIGN-MDC                                            | Illumina 750K Express                         | >95%  | > 99% | < 0.01                  | <10-3                             | Haplotype Reference Consortium |
| NINDS-SIGN-ASGC                                           | Illumina 610                                  | >95%  | > 99% | < 0.01                  | <10-3                             | Haplotype Reference Consortium |
| Barcelona                                                 | IlluminaHumanCoreExome                        | >95%  | > 95% | < 0.01                  | < 10-6                            | Haplotype Reference Consortium |
| Germany-WTCCC2                                            | Illumina Human660W-Quad                       | >98%  | >95%  | <0.01                   | < 10-5                            | Haplotype Reference Consortium |
| UK-WTCCC2                                                 | Illumina Human660W-Quad                       | >98%  | >95%  | <0.01                   | < 10-5                            | Haplotype Reference Consortium |
| WTCCC2-Immunochip                                         | Illumina Immunochip                           | > 95% | > 95% | <0.01                   | < 10-6                            | Haplotype Reference Consortium |
|                                                           |                                               |       |       |                         | <10-10                            |                                |
| Utrecht (Dutch Parelsnoer Study)                          |                                               |       |       | <10<br>minor<br>alleles | in cases;<br><10-5 in<br>controls | Haplotype Reference Consortium |
|                                                           | Illumina GSA                                  | >98%  | >99%  |                         |                                   |                                |
| Geisinger MyCode                                          | Illumina HumanOmniExpress and Illumina<br>GSA | >90%  | >90%  | <0.01                   | <10-15                            | Haplotype Reference Consortium |
| DECODE                                                    | Illumina HumanHap and OmniExpress arrays      | > 97% | > 95% | <0.01                   | 0.001                             | WGS Icelanders                 |
| Helsinki Stroke Study                                     | IlluminaHumanCoreExome                        | >95%  | > 95% | <0.01                   | <10-6                             | Haplotype Reference Consortium |
| Sahlgrenska Academy Study on<br>Ischemic Stroke (SAHLSIS) | Illumina Human Omni 5M array                  | > 97% | > 95% | = 0                     | <10-5                             | Haplotype Reference Consortium |

**Supplementary Table 2 – Instrumental Variables used in Mendelian Randomization Analysis**

| <b>BMI</b> |    |    |         |        |
|------------|----|----|---------|--------|
| SNP        | A1 | A2 | Beta    | SE     |
| rs1000096  | T  | C  | -0.0134 | 0.0018 |
| rs1000940  | A  | G  | -0.0115 | 0.0019 |
| rs1003081  | T  | C  | 0.0105  | 0.0017 |
| rs10035289 | A  | G  | 0.0114  | 0.0017 |
| rs10037047 | A  | G  | -0.0450 | 0.0030 |
| rs1006353  | A  | G  | 0.0112  | 0.0019 |
| rs10083803 | T  | C  | -0.0112 | 0.0019 |
| rs10110727 | A  | G  | 0.0118  | 0.0020 |
| rs10118701 | A  | G  | -0.0134 | 0.0019 |
| rs10131890 | A  | C  | -0.0252 | 0.0039 |
| rs10132280 | A  | C  | -0.0201 | 0.0019 |
| rs1014194  | A  | C  | 0.0109  | 0.0018 |
| rs1014312  | C  | G  | -0.0229 | 0.0024 |
| rs10146527 | T  | C  | 0.0130  | 0.0017 |
| rs1015362  | T  | C  | 0.0196  | 0.0034 |
| rs1015363  | A  | G  | 0.0342  | 0.0037 |
| rs10168197 | C  | G  | -0.0136 | 0.0021 |
| rs10182181 | A  | G  | -0.0277 | 0.0018 |
| rs10190332 | T  | G  | 0.0133  | 0.0022 |
| rs10203277 | A  | G  | 0.0200  | 0.0033 |
| rs1020548  | A  | G  | -0.0152 | 0.0023 |
| rs10211055 | T  | C  | -0.0140 | 0.0018 |
| rs10268050 | T  | C  | -0.0141 | 0.0021 |
| rs10269783 | A  | G  | 0.0137  | 0.0017 |
| rs1035010  | T  | C  | 0.0139  | 0.0020 |
| rs1037587  | T  | C  | 0.0102  | 0.0018 |
| rs1038088  | T  | G  | -0.0128 | 0.0017 |
| rs10408013 | T  | C  | 0.0133  | 0.0019 |

|            |   |   |         |        |
|------------|---|---|---------|--------|
| rs1040881  | T | C | 0.0110  | 0.0018 |
| rs10438964 | T | C | -0.0141 | 0.0020 |
| rs1045411  | T | C | -0.0153 | 0.0019 |
| rs10456637 | A | T | 0.0431  | 0.0040 |
| rs10459012 | A | C | 0.0277  | 0.0025 |
| rs10460960 | A | G | 0.0187  | 0.0025 |
| rs10467530 | C | G | 0.0191  | 0.0027 |
| rs1048365  | T | C | 0.0145  | 0.0025 |
| rs1048775  | C | G | 0.0115  | 0.0019 |
| rs1048932  | A | C | -0.0164 | 0.0018 |
| rs10497807 | C | G | -0.0184 | 0.0018 |
| rs10499276 | T | C | 0.0150  | 0.0025 |
| rs10500548 | T | C | 0.0218  | 0.0036 |
| rs10510321 | T | C | 0.0124  | 0.0021 |
| rs10511093 | T | C | -0.0270 | 0.0041 |
| rs10515050 | T | C | -0.0104 | 0.0018 |
| rs10519151 | A | T | 0.0307  | 0.0049 |
| rs1057452  | A | G | 0.0170  | 0.0024 |
| rs10733051 | A | G | 0.0097  | 0.0016 |
| rs10744146 | A | G | -0.0135 | 0.0017 |
| rs10745785 | T | C | -0.0113 | 0.0018 |
| rs10754210 | A | G | -0.0124 | 0.0018 |
| rs1075901  | T | C | -0.0127 | 0.0016 |
| rs10769165 | T | C | -0.0108 | 0.0018 |
| rs10772055 | C | G | -0.0174 | 0.0024 |
| rs10773049 | T | C | -0.0103 | 0.0017 |
| rs10779751 | A | G | 0.0140  | 0.0018 |
| rs10797115 | T | C | 0.0119  | 0.0017 |
| rs10818810 | A | G | 0.0108  | 0.0018 |
| rs10818938 | A | G | 0.0122  | 0.0017 |
| rs10830452 | A | G | -0.0116 | 0.0018 |

|            |   |   |         |        |
|------------|---|---|---------|--------|
| rs10832778 | C | G | -0.0114 | 0.0017 |
| rs10838122 | T | C | -0.0104 | 0.0018 |
| rs10838852 | T | C | -0.0885 | 0.0045 |
| rs10839472 | T | C | 0.0400  | 0.0028 |
| rs10840606 | A | G | -0.0174 | 0.0024 |
| rs10840674 | A | G | -0.0111 | 0.0018 |
| rs10842240 | C | G | 0.0204  | 0.0028 |
| rs10850031 | T | G | -0.0445 | 0.0040 |
| rs10865858 | T | C | 0.0106  | 0.0018 |
| rs10867256 | T | C | -0.0112 | 0.0017 |
| rs10876418 | T | C | -0.0189 | 0.0021 |
| rs10878946 | T | C | -0.0147 | 0.0019 |
| rs10883553 | A | C | 0.0116  | 0.0018 |
| rs10883759 | A | G | -0.0120 | 0.0018 |
| rs10886017 | A | C | 0.0131  | 0.0020 |
| rs10887578 | C | G | 0.0125  | 0.0017 |
| rs10915840 | A | G | -0.0127 | 0.0020 |
| rs10920678 | A | G | 0.0155  | 0.0017 |
| rs10923724 | T | C | -0.0114 | 0.0016 |
| rs10929925 | A | C | -0.0106 | 0.0017 |
| rs10930641 | A | G | -0.0156 | 0.0019 |
| rs10935143 | A | G | -0.0100 | 0.0017 |
| rs10938397 | A | G | -0.0328 | 0.0016 |
| rs10953620 | A | C | -0.0099 | 0.0017 |
| rs10955841 | A | G | 0.0141  | 0.0019 |
| rs10962549 | T | C | 0.0184  | 0.0024 |
| rs10971712 | T | C | -0.0181 | 0.0028 |
| rs10989568 | A | G | 0.0129  | 0.0019 |
| rs11030385 | A | G | -0.0194 | 0.0022 |
| rs11039014 | A | G | 0.0156  | 0.0022 |
| rs11066301 | A | G | 0.0124  | 0.0019 |

|            |   |   |         |        |
|------------|---|---|---------|--------|
| rs1106908  | A | G | -0.0156 | 0.0016 |
| rs11074446 | T | C | 0.0248  | 0.0024 |
| rs11075489 | T | C | -0.0110 | 0.0018 |
| rs11075986 | C | G | 0.0304  | 0.0047 |
| rs11079849 | T | C | -0.0149 | 0.0020 |
| rs11115176 | T | C | 0.0171  | 0.0022 |
| rs11118308 | A | G | 0.0101  | 0.0016 |
| rs11128760 | A | G | 0.0115  | 0.0017 |
| rs11150911 | A | C | 0.0139  | 0.0018 |
| rs11172702 | A | G | 0.0320  | 0.0039 |
| rs11190661 | T | C | -0.0182 | 0.0025 |
| rs11208662 | C | G | 0.0211  | 0.0031 |
| rs11250076 | A | G | 0.0642  | 0.0032 |
| rs11251352 | A | G | -0.0118 | 0.0018 |
| rs11259933 | A | G | -0.0130 | 0.0018 |
| rs11496125 | T | C | 0.0146  | 0.0018 |
| rs11577179 | A | G | -0.0129 | 0.0018 |
| rs1158103  | A | G | -0.0100 | 0.0017 |
| rs11583122 | T | C | 0.0173  | 0.0030 |
| rs11590474 | T | C | -0.0361 | 0.0037 |
| rs11600990 | T | C | -0.0151 | 0.0025 |
| rs11611246 | T | G | 0.0253  | 0.0021 |
| rs11611496 | A | G | -0.0150 | 0.0020 |
| rs11629783 | C | G | 0.0150  | 0.0021 |
| rs11635675 | T | G | 0.0171  | 0.0019 |
| rs11642001 | A | G | -0.0251 | 0.0031 |
| rs11659764 | A | T | -0.0305 | 0.0042 |
| rs11668301 | A | G | 0.0175  | 0.0024 |
| rs11672660 | T | C | -0.0355 | 0.0022 |
| rs11711337 | A | T | -0.0117 | 0.0019 |
| rs11736228 | A | T | 0.0122  | 0.0021 |

|            |   |   |         |        |
|------------|---|---|---------|--------|
| rs11753081 | T | G | 0.0133  | 0.0022 |
| rs11756653 | C | G | -0.0231 | 0.0039 |
| rs11773362 | T | C | -0.0112 | 0.0018 |
| rs1178060  | A | G | -0.1046 | 0.0065 |
| rs11781222 | T | C | 0.0155  | 0.0024 |
| rs11781699 | T | C | -0.0142 | 0.0022 |
| rs11783247 | T | C | -0.0890 | 0.0035 |
| rs11790280 | T | C | -0.0110 | 0.0019 |
| rs11792069 | A | G | 0.0151  | 0.0024 |
| rs11844682 | C | G | -0.0104 | 0.0018 |
| rs11855853 | T | C | -0.0205 | 0.0021 |
| rs11866815 | T | C | -0.0172 | 0.0019 |
| rs11889536 | A | G | 0.0185  | 0.0025 |
| rs11915371 | A | C | -0.0145 | 0.0021 |
| rs11929028 | T | G | 0.0787  | 0.0044 |
| rs11945861 | A | G | -0.0143 | 0.0020 |
| rs11971041 | A | G | -0.0191 | 0.0032 |
| rs11987383 | A | C | -0.0159 | 0.0026 |
| rs12033257 | A | G | 0.0135  | 0.0018 |
| rs12035149 | C | G | -0.0158 | 0.0021 |
| rs12035349 | A | G | -0.0204 | 0.0029 |
| rs12039524 | A | G | -0.0487 | 0.0046 |
| rs12041258 | T | C | 0.0148  | 0.0021 |
| rs12042908 | A | G | 0.0170  | 0.0016 |
| rs12042959 | A | G | 0.0183  | 0.0025 |
| rs12044597 | A | G | -0.0130 | 0.0017 |
| rs1205106  | A | G | -0.0100 | 0.0017 |
| rs12098284 | T | C | 0.0158  | 0.0027 |
| rs12101393 | C | G | 0.0161  | 0.0024 |
| rs12147845 | T | C | 0.0201  | 0.0027 |
| rs12148386 | T | C | 0.0476  | 0.0042 |

|            |   |   |         |        |
|------------|---|---|---------|--------|
| rs1218822  | A | G | 0.0151  | 0.0017 |
| rs12189178 | T | C | 0.0277  | 0.0048 |
| rs12207241 | A | G | -0.0414 | 0.0037 |
| rs12215331 | T | C | 0.0208  | 0.0023 |
| rs1229057  | T | C | 0.0160  | 0.0028 |
| rs12327272 | A | G | 0.0278  | 0.0034 |
| rs12364470 | T | G | -0.0171 | 0.0022 |
| rs12369009 | T | G | 0.0614  | 0.0050 |
| rs12411886 | A | C | 0.0339  | 0.0032 |
| rs12417072 | A | G | -0.0163 | 0.0027 |
| rs1241986  | A | G | -0.0149 | 0.0024 |
| rs12420725 | A | G | -0.0216 | 0.0037 |
| rs12422552 | C | G | -0.0143 | 0.0020 |
| rs12429545 | A | G | 0.0337  | 0.0026 |
| rs12439798 | T | G | 0.0129  | 0.0017 |
| rs12443621 | A | G | -0.0117 | 0.0017 |
| rs12446632 | A | G | -0.0335 | 0.0024 |
| rs12448257 | A | G | 0.0222  | 0.0021 |
| rs12448738 | A | C | -0.0150 | 0.0025 |
| rs12453418 | A | G | -0.0109 | 0.0018 |
| rs12458    | A | T | -0.0252 | 0.0021 |
| rs12479233 | A | T | -0.0100 | 0.0017 |
| rs12480713 | T | C | 0.0129  | 0.0020 |
| rs12488237 | T | C | -0.0233 | 0.0036 |
| rs12514473 | T | C | 0.0162  | 0.0020 |
| rs12564992 | A | G | -0.0384 | 0.0036 |
| rs12574668 | A | C | 0.0351  | 0.0036 |
| rs12575252 | C | G | -0.0157 | 0.0019 |
| rs12577642 | A | T | -0.0215 | 0.0018 |
| rs12587412 | T | G | 0.0113  | 0.0018 |
| rs12593036 | A | G | 0.0156  | 0.0020 |

|            |   |   |         |        |
|------------|---|---|---------|--------|
| rs12595158 | T | C | -0.0399 | 0.0054 |
| rs12595749 | A | G | 0.0150  | 0.0017 |
| rs12602912 | T | C | 0.0182  | 0.0021 |
| rs12609744 | T | C | -0.0134 | 0.0020 |
| rs12615778 | A | G | 0.0126  | 0.0020 |
| rs12625413 | T | C | -0.0112 | 0.0019 |
| rs12631248 | C | G | -0.0457 | 0.0036 |
| rs12637576 | T | C | 0.0273  | 0.0037 |
| rs12638746 | A | G | -0.0258 | 0.0032 |
| rs12655756 | A | T | 0.0124  | 0.0019 |
| rs12659802 | A | G | 0.0149  | 0.0020 |
| rs12666574 | A | G | 0.0130  | 0.0018 |
| rs1266922  | A | G | -0.0158 | 0.0023 |
| rs12675063 | A | T | -0.0157 | 0.0026 |
| rs12680842 | A | G | 0.0114  | 0.0018 |
| rs12682565 | A | G | 0.0344  | 0.0047 |
| rs12694021 | A | C | 0.0103  | 0.0017 |
| rs12705987 | A | T | 0.0211  | 0.0022 |
| rs12713433 | T | C | 0.0147  | 0.0023 |
| rs12731372 | T | C | 0.0121  | 0.0019 |
| rs12776880 | A | T | 0.0117  | 0.0019 |
| rs12885454 | A | C | -0.0150 | 0.0018 |
| rs12888545 | A | G | -0.0171 | 0.0021 |
| rs12902742 | A | T | 0.0211  | 0.0033 |
| rs12920590 | T | C | 0.0376  | 0.0032 |
| rs12922346 | C | G | 0.0121  | 0.0020 |
| rs12939549 | A | G | 0.0163  | 0.0016 |
| rs1296328  | A | C | 0.0149  | 0.0019 |
| rs12964689 | A | G | 0.0228  | 0.0018 |
| rs12991989 | C | G | 0.0111  | 0.0018 |
| rs13021737 | A | G | -0.0596 | 0.0024 |



|            |   |   |         |        |
|------------|---|---|---------|--------|
| rs13041173 | A | G | -0.0561 | 0.0045 |
| rs13045538 | T | C | -0.0665 | 0.0066 |
| rs13047416 | C | G | 0.0117  | 0.0019 |
| rs13072095 | T | C | 0.0104  | 0.0017 |
| rs13085472 | T | C | 0.0110  | 0.0018 |
| rs13095652 | T | C | -0.0133 | 0.0021 |
| rs13107325 | T | C | 0.0449  | 0.0033 |
| rs13110266 | A | G | -0.0114 | 0.0018 |
| rs13163306 | A | G | -0.0108 | 0.0018 |
| rs13174863 | A | G | -0.0197 | 0.0024 |
| rs13175892 | T | C | 0.0998  | 0.0075 |
| rs13191362 | A | G | 0.0206  | 0.0027 |
| rs13201877 | A | G | -0.0146 | 0.0024 |
| rs13203153 | A | G | -0.0156 | 0.0023 |
| rs13203286 | T | G | 0.0334  | 0.0043 |
| rs13207082 | A | G | -0.1012 | 0.0061 |
| rs1320903  | A | G | 0.0160  | 0.0022 |
| rs13209753 | A | G | -0.0221 | 0.0037 |
| rs13209872 | C | G | -0.0127 | 0.0019 |
| rs13209968 | C | G | 0.0119  | 0.0017 |
| rs13227433 | T | G | -0.0145 | 0.0021 |
| rs13227658 | T | C | -0.0206 | 0.0018 |
| rs1323068  | A | G | -0.0130 | 0.0019 |
| rs13240600 | A | G | 0.0215  | 0.0025 |
| rs1324110  | C | G | -0.0115 | 0.0018 |
| rs13247665 | T | C | -0.0120 | 0.0019 |
| rs13263601 | A | C | -0.0121 | 0.0018 |
| rs13290794 | A | G | -0.0130 | 0.0019 |
| rs13292976 | T | C | 0.0108  | 0.0018 |
| rs13321566 | A | G | -0.0155 | 0.0023 |
| rs13329567 | T | C | -0.0354 | 0.0023 |

|            |   |   |         |        |
|------------|---|---|---------|--------|
| rs1333423  | A | T | 0.0148  | 0.0022 |
| rs13417156 | T | C | -0.0135 | 0.0017 |
| rs13432055 | T | C | -0.0133 | 0.0018 |
| rs1345148  | T | C | -0.0101 | 0.0017 |
| rs1358808  | C | G | -0.0305 | 0.0022 |
| rs1362910  | A | G | 0.0154  | 0.0019 |
| rs1365466  | T | C | -0.0146 | 0.0019 |
| rs1371108  | A | C | 0.0157  | 0.0019 |
| rs1375561  | T | C | 0.0131  | 0.0020 |
| rs1394     | A | G | -0.0488 | 0.0023 |
| rs1399054  | A | G | 0.0218  | 0.0027 |
| rs1403846  | T | C | 0.0121  | 0.0021 |
| rs1405348  | A | G | -0.0135 | 0.0020 |
| rs1412235  | C | G | 0.0325  | 0.0021 |
| rs1423627  | T | C | -0.0642 | 0.0038 |
| rs1431659  | A | G | 0.0204  | 0.0019 |
| rs143384   | A | G | 0.0153  | 0.0020 |
| rs1436343  | A | G | -0.0123 | 0.0018 |
| rs1437929  | A | G | 0.0119  | 0.0019 |
| rs1451533  | A | G | 0.0144  | 0.0020 |
| rs1452075  | T | C | 0.0143  | 0.0018 |
| rs1452134  | T | C | -0.0102 | 0.0017 |
| rs1454148  | T | C | 0.0115  | 0.0019 |
| rs1454687  | C | G | 0.0197  | 0.0017 |
| rs1455137  | A | C | -0.0110 | 0.0018 |
| rs1473579  | A | G | -0.0858 | 0.0047 |
| rs1475774  | A | G | 0.0751  | 0.0074 |
| rs1477887  | A | G | -0.0128 | 0.0018 |
| rs1492767  | T | C | 0.0097  | 0.0016 |
| rs1498139  | A | C | 0.0131  | 0.0021 |
| rs1503139  | A | G | -0.0134 | 0.0021 |

|            |   |   |         |        |
|------------|---|---|---------|--------|
| rs150353   | T | G | -0.0112 | 0.0018 |
| rs1512065  | A | G | 0.0145  | 0.0021 |
| rs1522569  | T | G | 0.0148  | 0.0022 |
| rs1544459  | T | C | -0.0104 | 0.0016 |
| rs1549293  | T | C | -0.0175 | 0.0019 |
| rs1552717  | A | T | 0.0175  | 0.0026 |
| rs1554193  | A | T | -0.0105 | 0.0017 |
| rs1558236  | C | G | 0.0560  | 0.0072 |
| rs156151   | C | G | -0.0146 | 0.0022 |
| rs1564981  | A | G | 0.0113  | 0.0017 |
| rs159032   | T | C | 0.0123  | 0.0020 |
| rs1593304  | A | G | 0.0128  | 0.0022 |
| rs1594830  | C | G | -0.0125 | 0.0021 |
| rs1600136  | A | C | -0.0320 | 0.0030 |
| rs160401   | T | C | 0.0214  | 0.0030 |
| rs1608445  | A | G | -0.0104 | 0.0018 |
| rs1625427  | T | C | 0.0134  | 0.0018 |
| rs1650586  | T | G | 0.0180  | 0.0029 |
| rs1657930  | A | G | -0.0173 | 0.0024 |
| rs1658820  | T | G | 0.0146  | 0.0021 |
| rs1668633  | T | C | 0.0109  | 0.0017 |
| rs16823670 | A | G | 0.0309  | 0.0052 |
| rs16828086 | C | G | 0.0106  | 0.0018 |
| rs16851483 | T | G | 0.0339  | 0.0039 |
| rs16906845 | A | G | -0.0232 | 0.0038 |
| rs16907751 | T | C | -0.0201 | 0.0030 |
| rs16932761 | A | G | -0.0139 | 0.0020 |
| rs16951319 | T | C | -0.0165 | 0.0027 |
| rs16952479 | A | T | -0.0357 | 0.0045 |
| rs16965062 | T | C | 0.0099  | 0.0017 |
| rs16966801 | A | G | -0.0143 | 0.0022 |

|            |   |   |         |        |
|------------|---|---|---------|--------|
| rs1700137  | T | C | -0.0134 | 0.0019 |
| rs17014375 | T | G | -0.0162 | 0.0025 |
| rs17035438 | A | G | 0.0191  | 0.0032 |
| rs17056301 | T | C | -0.0173 | 0.0021 |
| rs17069831 | T | C | -0.0125 | 0.0020 |
| rs17080319 | T | C | 0.0569  | 0.0039 |
| rs17091470 | T | G | -0.0512 | 0.0050 |
| rs17094222 | T | C | -0.0275 | 0.0027 |
| rs17096549 | A | G | 0.0533  | 0.0063 |
| rs17096552 | A | G | -0.0203 | 0.0029 |
| rs17105272 | T | C | 0.0114  | 0.0019 |
| rs1712517  | T | C | -0.0118 | 0.0019 |
| rs17197116 | T | C | 0.0348  | 0.0048 |
| rs17199978 | A | G | 0.0217  | 0.0033 |
| rs17203016 | A | G | -0.0122 | 0.0020 |
| rs17207196 | T | C | -0.0184 | 0.0020 |
| rs17238110 | A | G | 0.0352  | 0.0050 |
| rs17285919 | T | C | 0.1203  | 0.0064 |
| rs1730859  | A | G | -0.0112 | 0.0017 |
| rs17327461 | T | C | 0.0119  | 0.0016 |
| rs17351791 | A | C | 0.0109  | 0.0018 |
| rs17391694 | T | C | 0.0293  | 0.0026 |
| rs174415   | A | T | 0.0129  | 0.0022 |
| rs17446091 | T | C | -0.0122 | 0.0021 |
| rs17448682 | T | C | 0.0131  | 0.0021 |
| rs17522122 | T | G | 0.0164  | 0.0017 |
| rs17525725 | A | G | -0.0102 | 0.0018 |
| rs17531363 | A | C | 0.0127  | 0.0020 |
| rs17538472 | T | C | 0.0129  | 0.0022 |
| rs17551974 | A | C | -0.0127 | 0.0022 |
| rs17591778 | A | G | 0.0148  | 0.0023 |

|            |   |   |         |        |
|------------|---|---|---------|--------|
| rs17608150 | T | C | 0.0193  | 0.0033 |
| rs17636031 | T | C | -0.0169 | 0.0021 |
| rs17681451 | A | G | -0.0268 | 0.0034 |
| rs17681708 | T | C | -0.0104 | 0.0018 |
| rs17724992 | A | G | 0.0180  | 0.0019 |
| rs17739298 | C | G | 0.0351  | 0.0032 |
| rs17757975 | T | C | 0.0160  | 0.0025 |
| rs17795934 | T | C | -0.0114 | 0.0018 |
| rs17806379 | T | C | -0.0248 | 0.0023 |
| rs17820822 | T | G | 0.0113  | 0.0019 |
| rs1782507  | T | G | -0.0130 | 0.0020 |
| rs1787267  | C | G | -0.0241 | 0.0036 |
| rs1789165  | A | G | 0.0125  | 0.0017 |
| rs1791253  | T | G | 0.0221  | 0.0037 |
| rs1814170  | A | T | 0.0207  | 0.0029 |
| rs181732   | T | G | -0.0301 | 0.0028 |
| rs1819844  | A | G | 0.0141  | 0.0021 |
| rs1852006  | A | G | -0.0133 | 0.0021 |
| rs1853639  | A | G | -0.0121 | 0.0018 |
| rs1862451  | A | G | 0.0156  | 0.0020 |
| rs1865341  | T | C | 0.0130  | 0.0020 |
| rs186543   | C | G | -0.0349 | 0.0023 |
| rs1866510  | T | C | -0.0108 | 0.0018 |
| rs1884389  | T | C | -0.0109 | 0.0017 |
| rs1884897  | A | G | -0.0191 | 0.0017 |
| rs1899689  | T | C | 0.0121  | 0.0016 |
| rs1899951  | T | C | 0.0155  | 0.0025 |
| rs1903579  | C | G | 0.0125  | 0.0017 |
| rs1909586  | T | G | -0.0111 | 0.0018 |
| rs1927790  | T | C | -0.0127 | 0.0017 |
| rs1928295  | T | C | 0.0152  | 0.0016 |

|           |   |   |         |        |
|-----------|---|---|---------|--------|
| rs1937684 | A | T | 0.0112  | 0.0018 |
| rs1941697 | A | G | 0.0137  | 0.0017 |
| rs1942866 | C | G | 0.0187  | 0.0031 |
| rs1943477 | T | C | -0.0223 | 0.0036 |
| rs1951455 | T | C | -0.0136 | 0.0019 |
| rs1956151 | A | G | -0.0156 | 0.0023 |
| rs1973993 | T | C | -0.0204 | 0.0018 |
| rs1982441 | T | G | 0.0155  | 0.0027 |
| rs1983864 | T | G | 0.0119  | 0.0019 |
| rs2000746 | A | G | 0.0153  | 0.0021 |
| rs2003616 | T | G | 0.0125  | 0.0020 |
| rs200968  | T | C | 0.0790  | 0.0050 |
| rs2010281 | A | G | -0.0109 | 0.0019 |
| rs2012927 | A | G | 0.0106  | 0.0018 |
| rs2030342 | T | C | 0.0169  | 0.0018 |
| rs2047632 | C | G | -0.0379 | 0.0059 |
| rs2075205 | A | T | 0.0131  | 0.0017 |
| rs2075650 | A | G | 0.0224  | 0.0023 |
| rs208015  | T | C | 0.0311  | 0.0035 |
| rs2080454 | A | C | -0.0112 | 0.0018 |
| rs2098618 | A | T | 0.0500  | 0.0042 |
| rs2100814 | A | G | 0.0116  | 0.0017 |
| rs2122042 | T | G | 0.0242  | 0.0023 |
| rs2124499 | C | G | -0.0126 | 0.0017 |
| rs2140418 | T | C | -0.0429 | 0.0034 |
| rs2143253 | A | G | -0.0189 | 0.0026 |
| rs2154297 | T | C | -0.0111 | 0.0019 |
| rs215632  | A | G | 0.0115  | 0.0020 |
| rs2160077 | A | G | 0.0121  | 0.0017 |
| rs2163188 | C | G | 0.0105  | 0.0018 |
| rs2170382 | T | C | 0.0168  | 0.0027 |

|           |   |   |         |        |
|-----------|---|---|---------|--------|
| rs2174307 | C | G | 0.0114  | 0.0017 |
| rs217671  | A | G | -0.0126 | 0.0019 |
| rs2185027 | A | C | -0.0132 | 0.0018 |
| rs2190788 | T | G | 0.0181  | 0.0020 |
| rs2192158 | A | G | 0.0150  | 0.0017 |
| rs2194385 | A | C | 0.0101  | 0.0017 |
| rs2228213 | A | G | -0.0140 | 0.0017 |
| rs223051  | T | C | 0.0105  | 0.0018 |
| rs2230590 | T | C | -0.0562 | 0.0023 |
| rs2230929 | A | G | 0.0474  | 0.0034 |
| rs2236950 | A | C | -0.0190 | 0.0027 |
| rs2240108 | T | C | -0.0159 | 0.0026 |
| rs2275426 | A | G | 0.0157  | 0.0020 |
| rs2282231 | T | C | 0.0134  | 0.0021 |
| rs2283093 | T | C | 0.0126  | 0.0021 |
| rs2293605 | T | C | -0.0164 | 0.0028 |
| rs2295896 | A | G | -0.0149 | 0.0025 |
| rs2304130 | A | G | 0.0214  | 0.0035 |
| rs2304607 | A | G | -0.0493 | 0.0028 |
| rs2307022 | A | G | 0.0513  | 0.0033 |
| rs2307111 | T | C | 0.0218  | 0.0017 |
| rs2356865 | T | C | -0.0122 | 0.0020 |
| rs2357760 | A | G | 0.0107  | 0.0018 |
| rs2365389 | T | C | -0.0132 | 0.0019 |
| rs2367112 | T | G | 0.0115  | 0.0017 |
| rs2386802 | A | C | -0.0254 | 0.0029 |
| rs2397061 | T | C | -0.0386 | 0.0037 |
| rs2409730 | A | C | 0.1059  | 0.0038 |
| rs2412107 | T | G | 0.0136  | 0.0021 |
| rs2425241 | T | C | -0.0243 | 0.0035 |
| rs2425857 | A | G | 0.0138  | 0.0017 |

|           |   |   |         |        |
|-----------|---|---|---------|--------|
| rs2429150 | A | C | -0.0125 | 0.0018 |
| rs2440885 | A | G | 0.0124  | 0.0019 |
| rs2459359 | C | G | 0.0658  | 0.0061 |
| rs2467110 | T | C | -0.0141 | 0.0022 |
| rs2479958 | A | G | 0.0130  | 0.0018 |
| rs248139  | A | G | 0.0160  | 0.0023 |
| rs2481665 | T | C | 0.0152  | 0.0017 |
| rs2491864 | A | G | 0.0133  | 0.0021 |
| rs2504674 | C | G | -0.0146 | 0.0019 |
| rs2516739 | A | G | -0.0129 | 0.0022 |
| rs2534760 | A | T | -0.0144 | 0.0021 |
| rs2537847 | A | G | -0.0119 | 0.0020 |
| rs2543132 | C | G | 0.0175  | 0.0023 |
| rs254428  | T | G | 0.0102  | 0.0017 |
| rs25832   | A | G | 0.0148  | 0.0020 |
| rs2590942 | T | G | 0.0207  | 0.0022 |
| rs2593280 | A | G | 0.0154  | 0.0025 |
| rs2605603 | A | G | -0.0102 | 0.0016 |
| rs2611742 | T | C | -0.0194 | 0.0021 |
| rs2619976 | T | C | 0.0107  | 0.0018 |
| rs262956  | T | G | 0.0109  | 0.0019 |
| rs2631681 | T | C | -0.0106 | 0.0017 |
| rs2634047 | C | G | -0.0135 | 0.0020 |
| rs2635727 | T | C | -0.0506 | 0.0034 |
| rs2653365 | T | C | -0.0177 | 0.0028 |
| rs2680648 | T | C | 0.0144  | 0.0021 |
| rs2710323 | T | C | -0.0153 | 0.0017 |
| rs2721965 | A | C | 0.0143  | 0.0019 |
| rs2724861 | A | G | -0.0153 | 0.0021 |
| rs2731222 | A | C | 0.0120  | 0.0019 |
| rs2733287 | A | C | -0.0162 | 0.0017 |



|           |   |   |         |        |
|-----------|---|---|---------|--------|
| rs273504  | A | G | -0.0131 | 0.0018 |
| rs273697  | A | G | -0.0107 | 0.0017 |
| rs2768950 | A | G | 0.0116  | 0.0019 |
| rs2781668 | T | C | 0.0194  | 0.0023 |
| rs2814992 | A | G | -0.0519 | 0.0032 |
| rs2820311 | A | G | -0.0180 | 0.0022 |
| rs28350   | A | G | 0.0139  | 0.0024 |
| rs2836961 | A | C | -0.0121 | 0.0018 |
| rs2838006 | T | C | -0.0127 | 0.0018 |
| rs284227  | T | C | -0.0152 | 0.0019 |
| rs2842385 | A | G | -0.0152 | 0.0023 |
| rs2850969 | T | C | -0.0144 | 0.0024 |
| rs2863981 | A | G | -0.0414 | 0.0035 |
| rs2866816 | T | C | 0.0124  | 0.0021 |
| rs2875762 | C | G | 0.0124  | 0.0020 |
| rs2890652 | T | C | -0.0169 | 0.0023 |
| rs2902021 | T | C | 0.0232  | 0.0035 |
| rs293566  | T | C | -0.0162 | 0.0024 |
| rs2974255 | A | G | 0.0237  | 0.0026 |
| rs29938   | T | C | -0.0133 | 0.0018 |
| rs310618  | T | C | -0.0119 | 0.0018 |
| rs3134353 | A | T | -0.0120 | 0.0018 |
| rs3134438 | A | C | 0.0121  | 0.0019 |
| rs316611  | T | C | 0.0127  | 0.0021 |
| rs326889  | T | C | -0.0124 | 0.0019 |
| rs329124  | A | G | 0.0133  | 0.0017 |
| rs329277  | T | G | -0.0099 | 0.0017 |
| rs329651  | T | G | 0.0174  | 0.0022 |
| rs331949  | T | C | -0.0124 | 0.0018 |
| rs340025  | T | C | -0.0121 | 0.0017 |
| rs346722  | T | C | 0.0251  | 0.0038 |

|           |   |   |         |        |
|-----------|---|---|---------|--------|
| rs355777  | C | G | 0.0131  | 0.0018 |
| rs3734572 | T | C | -0.0308 | 0.0043 |
| rs3736485 | A | G | 0.0116  | 0.0016 |
| rs3739555 | T | G | 0.0137  | 0.0024 |
| rs3739733 | A | G | 0.0130  | 0.0021 |
| rs3746429 | T | C | 0.0666  | 0.0046 |
| rs3751813 | T | G | 0.0175  | 0.0025 |
| rs3753549 | T | C | -0.0229 | 0.0026 |
| rs3762396 | A | G | 0.0110  | 0.0019 |
| rs3768486 | A | G | -0.0125 | 0.0021 |
| rs3772934 | T | C | 0.0110  | 0.0019 |
| rs3781099 | T | C | 0.0204  | 0.0031 |
| rs3794702 | A | T | 0.0137  | 0.0024 |
| rs3800229 | T | G | 0.0154  | 0.0019 |
| rs3800649 | A | G | 0.0111  | 0.0019 |
| rs3802924 | A | C | 0.0138  | 0.0023 |
| rs3803286 | A | G | 0.0168  | 0.0018 |
| rs3807049 | T | C | 0.0399  | 0.0033 |
| rs3807566 | T | G | -0.0122 | 0.0017 |
| rs3808434 | A | G | 0.0105  | 0.0016 |
| rs3809272 | A | G | 0.0201  | 0.0023 |
| rs3810291 | A | G | 0.0294  | 0.0021 |
| rs3814883 | T | C | 0.0234  | 0.0017 |
| rs3819299 | T | G | 0.0213  | 0.0035 |
| rs3821841 | T | C | -0.0225 | 0.0034 |
| rs3822683 | A | G | 0.0125  | 0.0021 |
| rs3826705 | T | C | -0.0157 | 0.0027 |
| rs3829849 | T | C | 0.0120  | 0.0018 |
| rs3844598 | A | G | -0.0120 | 0.0018 |
| rs3849570 | A | C | 0.0160  | 0.0018 |
| rs3850422 | A | G | -0.0112 | 0.0016 |

|           |   |   |         |        |
|-----------|---|---|---------|--------|
| rs3851083 | A | G | -0.0093 | 0.0016 |
| rs3887080 | A | G | 0.0180  | 0.0027 |
| rs3902840 | A | G | 0.0254  | 0.0032 |
| rs3902951 | T | G | -0.0120 | 0.0020 |
| rs3915844 | A | G | 0.0197  | 0.0027 |
| rs3922853 | A | C | 0.0144  | 0.0023 |
| rs39654   | A | G | -0.0154 | 0.0017 |
| rs40067   | A | G | -0.0230 | 0.0023 |
| rs40245   | A | T | 0.0117  | 0.0018 |
| rs403656  | A | G | 0.0720  | 0.0056 |
| rs4076358 | A | G | 0.0104  | 0.0017 |
| rs4077093 | T | G | 0.0131  | 0.0022 |
| rs411717  | T | C | -0.0106 | 0.0018 |
| rs4148155 | A | G | 0.0189  | 0.0026 |
| rs419261  | T | C | 0.0101  | 0.0018 |
| rs4273371 | T | C | -0.0112 | 0.0017 |
| rs4278019 | A | T | 0.0114  | 0.0020 |
| rs427943  | A | C | -0.0166 | 0.0018 |
| rs4284600 | T | C | -0.0100 | 0.0017 |
| rs4303732 | T | C | 0.0137  | 0.0018 |
| rs4307239 | A | G | -0.0106 | 0.0017 |
| rs4339513 | T | C | 0.0449  | 0.0051 |
| rs4342060 | T | C | -0.0197 | 0.0026 |
| rs4366093 | T | C | -0.0109 | 0.0018 |
| rs4372296 | A | C | -0.0191 | 0.0022 |
| rs4372836 | T | C | 0.0150  | 0.0018 |
| rs4383818 | T | G | 0.0247  | 0.0038 |
| rs450231  | A | G | -0.0142 | 0.0020 |
| rs4515655 | T | C | -0.0113 | 0.0019 |
| rs4516268 | A | C | -0.0190 | 0.0021 |
| rs4518345 | A | G | -0.0119 | 0.0019 |

|           |   |   |         |        |
|-----------|---|---|---------|--------|
| rs4524456 | A | G | -0.0106 | 0.0018 |
| rs453520  | T | C | -0.0154 | 0.0017 |
| rs4542429 | T | C | -0.0286 | 0.0028 |
| rs4624596 | T | C | 0.0140  | 0.0023 |
| rs4639527 | A | G | -0.0161 | 0.0020 |
| rs4643949 | T | C | 0.0224  | 0.0031 |
| rs4653017 | T | C | 0.0107  | 0.0018 |
| rs4670626 | T | C | -0.0120 | 0.0018 |
| rs4671328 | T | G | 0.0176  | 0.0020 |
| rs4671358 | A | T | 0.0146  | 0.0020 |
| rs4673553 | T | G | -0.0130 | 0.0017 |
| rs4676084 | A | G | 0.0107  | 0.0017 |
| rs4678297 | T | C | 0.0243  | 0.0027 |
| rs4718966 | T | C | 0.0119  | 0.0019 |
| rs4722398 | T | C | 0.0182  | 0.0026 |
| rs4722672 | T | C | -0.0127 | 0.0021 |
| rs4725984 | T | C | -0.0125 | 0.0017 |
| rs4737183 | A | G | 0.0115  | 0.0017 |
| rs4740383 | A | G | 0.0118  | 0.0019 |
| rs4744275 | A | G | 0.0114  | 0.0019 |
| rs4759073 | A | G | -0.0116 | 0.0017 |
| rs4759228 | C | G | -0.0145 | 0.0019 |
| rs4764949 | A | G | 0.0193  | 0.0019 |
| rs4766710 | A | G | 0.0228  | 0.0036 |
| rs4783241 | C | G | -0.0105 | 0.0017 |
| rs4796243 | A | G | -0.0125 | 0.0019 |
| rs4814512 | A | C | 0.0156  | 0.0021 |
| rs4820408 | T | G | 0.0196  | 0.0019 |
| rs4841659 | T | C | 0.1181  | 0.0038 |
| rs4854326 | A | G | 0.0201  | 0.0021 |
| rs4858193 | T | C | 0.0125  | 0.0019 |

|           |   |   |         |        |
|-----------|---|---|---------|--------|
| rs4864201 | T | C | 0.0128  | 0.0017 |
| rs487060  | T | C | 0.0106  | 0.0016 |
| rs4886506 | T | G | 0.0399  | 0.0040 |
| rs4886869 | A | G | -0.0290 | 0.0024 |
| rs4889782 | T | C | -0.0122 | 0.0018 |
| rs4906908 | T | G | -0.0103 | 0.0017 |
| rs4916661 | T | G | -0.0256 | 0.0022 |
| rs4936175 | T | C | -0.0130 | 0.0017 |
| rs4936671 | C | G | 0.0120  | 0.0018 |
| rs4939051 | C | G | 0.0665  | 0.0058 |
| rs4969387 | C | G | -0.0172 | 0.0022 |
| rs497417  | A | T | 0.0728  | 0.0031 |
| rs4981693 | A | G | 0.0161  | 0.0022 |
| rs498240  | A | G | -0.0246 | 0.0035 |
| rs4985155 | A | G | 0.0120  | 0.0019 |
| rs4986044 | T | C | -0.0159 | 0.0016 |
| rs524281  | A | C | -0.0146 | 0.0020 |
| rs5396    | T | C | -0.0152 | 0.0018 |
| rs543874  | A | G | -0.0475 | 0.0021 |
| rs551137  | T | C | 0.0596  | 0.0050 |
| rs555267  | T | G | 0.0112  | 0.0018 |
| rs559267  | A | G | -0.0125 | 0.0017 |
| rs573455  | A | G | -0.0117 | 0.0017 |
| rs5750913 | A | G | -0.0126 | 0.0022 |
| rs577525  | T | C | -0.0132 | 0.0018 |
| rs580438  | T | C | 0.0118  | 0.0018 |
| rs587230  | A | G | 0.0180  | 0.0024 |
| rs6011457 | A | T | -0.0117 | 0.0017 |
| rs6019482 | T | C | -0.0185 | 0.0023 |
| rs6058635 | C | G | 0.0267  | 0.0031 |
| rs6060151 | T | G | -0.0619 | 0.0043 |

|           |   |   |         |        |
|-----------|---|---|---------|--------|
| rs6061162 | T | C | 0.0498  | 0.0053 |
| rs6076348 | A | G | -0.0226 | 0.0030 |
| rs6088529 | A | C | 0.0488  | 0.0036 |
| rs6088943 | A | T | 0.0254  | 0.0039 |
| rs6121381 | A | T | -0.0256 | 0.0028 |
| rs6132918 | T | C | -0.0231 | 0.0029 |
| rs6138482 | T | C | 0.0199  | 0.0022 |
| rs6142096 | A | G | 0.0196  | 0.0029 |
| rs621042  | A | C | -0.0109 | 0.0017 |
| rs6235    | C | G | -0.0141 | 0.0020 |
| rs6265    | T | C | -0.0356 | 0.0022 |
| rs629443  | T | G | 0.0111  | 0.0019 |
| rs6442021 | T | C | -0.0110 | 0.0017 |
| rs6442101 | T | C | -0.0194 | 0.0018 |
| rs6448587 | A | C | 0.0151  | 0.0024 |
| rs6449531 | A | G | -0.0155 | 0.0019 |
| rs6459326 | C | G | -0.0219 | 0.0038 |
| rs6461115 | A | G | 0.0146  | 0.0019 |
| rs6463489 | T | C | 0.0153  | 0.0026 |
| rs6474945 | T | G | -0.0171 | 0.0016 |
| rs6477694 | T | C | -0.0123 | 0.0018 |
| rs6490055 | A | G | -0.0530 | 0.0040 |
| rs6494481 | T | G | 0.0221  | 0.0033 |
| rs6495252 | T | C | 0.0134  | 0.0019 |
| rs651548  | A | G | 0.0125  | 0.0020 |
| rs6545714 | A | G | -0.0199 | 0.0017 |
| rs6548221 | A | G | 0.0153  | 0.0020 |
| rs6551410 | A | T | -0.0493 | 0.0044 |
| rs6564360 | A | G | -0.0130 | 0.0022 |
| rs6569648 | T | C | -0.0127 | 0.0019 |
| rs6577584 | T | G | -0.0120 | 0.0018 |

|           |   |   |         |        |
|-----------|---|---|---------|--------|
| rs6580755 | T | C | -0.0327 | 0.0038 |
| rs6587552 | A | G | 0.0150  | 0.0021 |
| rs6595205 | C | G | 0.0116  | 0.0016 |
| rs6606686 | C | G | -0.0144 | 0.0019 |
| rs663129  | A | G | 0.0327  | 0.0028 |
| rs6681627 | A | C | -0.0574 | 0.0053 |
| rs6690764 | A | G | -0.0154 | 0.0022 |
| rs6700816 | A | T | 0.0328  | 0.0052 |
| rs6700838 | T | C | -0.0188 | 0.0018 |
| rs6710871 | A | G | 0.0156  | 0.0024 |
| rs6711584 | A | G | 0.0195  | 0.0020 |
| rs6713781 | C | G | -0.0108 | 0.0019 |
| rs6720868 | T | C | 0.0142  | 0.0018 |
| rs6738445 | T | C | -0.0166 | 0.0021 |
| rs6753170 | T | C | 0.0137  | 0.0021 |
| rs6764533 | A | G | 0.0110  | 0.0018 |
| rs676749  | A | T | -0.0126 | 0.0018 |
| rs6767619 | C | G | 0.0121  | 0.0018 |
| rs6786125 | C | G | -0.0158 | 0.0023 |
| rs6786582 | T | C | -0.0698 | 0.0044 |
| rs6803870 | T | C | -0.0330 | 0.0041 |
| rs6804181 | A | T | 0.0144  | 0.0024 |
| rs6804842 | A | G | -0.0157 | 0.0018 |
| rs6818414 | T | C | -0.0105 | 0.0017 |
| rs6827083 | A | G | -0.0124 | 0.0018 |
| rs6843738 | A | G | -0.0114 | 0.0017 |
| rs6879326 | T | C | -0.0100 | 0.0017 |
| rs6888159 | C | G | 0.0142  | 0.0019 |
| rs6900723 | T | C | -0.0121 | 0.0018 |
| rs6908295 | A | C | -0.0223 | 0.0028 |
| rs6919443 | A | G | -0.0101 | 0.0018 |

|           |   |   |         |        |
|-----------|---|---|---------|--------|
| rs6921533 | T | C | 0.0129  | 0.0019 |
| rs6922214 | A | G | -0.0148 | 0.0025 |
| rs6922855 | A | G | 0.0196  | 0.0024 |
| rs6938239 | A | G | 0.0292  | 0.0038 |
| rs6963840 | T | C | 0.0159  | 0.0024 |
| rs696606  | A | G | 0.0117  | 0.0018 |
| rs6968554 | A | G | -0.0100 | 0.0017 |
| rs7006629 | T | C | 0.0123  | 0.0018 |
| rs7024334 | T | G | 0.0124  | 0.0020 |
| rs7042372 | A | G | 0.0128  | 0.0018 |
| rs7083450 | T | C | 0.0190  | 0.0029 |
| rs7084454 | A | G | 0.0200  | 0.0019 |
| rs7102454 | T | C | -0.0125 | 0.0019 |
| rs710355  | C | G | -0.0266 | 0.0040 |
| rs711347  | A | T | -0.0122 | 0.0020 |
| rs7117238 | A | G | -0.0143 | 0.0022 |
| rs7120873 | T | C | 0.0540  | 0.0037 |
| rs7122539 | A | G | -0.0130 | 0.0019 |
| rs7123876 | T | C | -0.0114 | 0.0019 |
| rs7124442 | T | C | -0.0205 | 0.0018 |
| rs7124681 | A | C | 0.0411  | 0.0021 |
| rs7131262 | A | T | -0.0221 | 0.0022 |
| rs7133378 | A | G | 0.0108  | 0.0018 |
| rs7134375 | A | C | 0.0120  | 0.0019 |
| rs7138803 | A | G | 0.0287  | 0.0021 |
| rs7144011 | T | G | 0.0297  | 0.0024 |
| rs7147503 | T | C | -0.0123 | 0.0018 |
| rs7164727 | T | C | 0.0175  | 0.0017 |
| rs7181498 | T | C | 0.0155  | 0.0018 |
| rs7181610 | A | T | 0.0148  | 0.0025 |
| rs7187776 | A | G | -0.0269 | 0.0016 |



|           |   |   |         |        |
|-----------|---|---|---------|--------|
| rs7195386 | T | C | 0.0153  | 0.0018 |
| rs719802  | T | C | 0.0109  | 0.0018 |
| rs7200919 | A | G | 0.0546  | 0.0037 |
| rs7206608 | C | G | -0.0125 | 0.0019 |
| rs7209235 | A | G | -0.0118 | 0.0019 |
| rs7211567 | T | C | -0.0154 | 0.0021 |
| rs7217226 | T | G | -0.0113 | 0.0018 |
| rs7239114 | A | G | 0.0121  | 0.0017 |
| rs7243357 | T | G | 0.0212  | 0.0021 |
| rs7313924 | C | G | 0.0118  | 0.0019 |
| rs7334078 | T | C | 0.0129  | 0.0019 |
| rs733594  | T | C | 0.0136  | 0.0018 |
| rs7377083 | A | C | 0.0159  | 0.0018 |
| rs740157  | A | G | 0.0106  | 0.0016 |
| rs7425440 | T | C | 0.0214  | 0.0025 |
| rs7444298 | A | G | 0.1244  | 0.0050 |
| rs7478904 | T | C | -0.0517 | 0.0043 |
| rs753010  | C | G | -0.0438 | 0.0059 |
| rs7531118 | T | C | -0.0221 | 0.0018 |
| rs7531656 | A | G | 0.0194  | 0.0018 |
| rs7535528 | A | G | -0.0146 | 0.0018 |
| rs7550711 | T | C | 0.0636  | 0.0051 |
| rs7556169 | A | G | -0.0120 | 0.0018 |
| rs7557796 | T | C | 0.0176  | 0.0018 |
| rs7560871 | A | G | 0.0203  | 0.0034 |
| rs7561278 | T | C | 0.0160  | 0.0021 |
| rs7564679 | A | G | -0.0120 | 0.0016 |
| rs756717  | A | G | -0.0150 | 0.0019 |
| rs757608  | A | G | -0.0100 | 0.0017 |
| rs7598402 | C | G | 0.0145  | 0.0018 |
| rs7599312 | A | G | -0.0178 | 0.0020 |

|           |   |   |         |        |
|-----------|---|---|---------|--------|
| rs7600699 | C | G | -0.0141 | 0.0024 |
| rs7601895 | C | G | 0.0174  | 0.0021 |
| rs7607351 | T | C | 0.0121  | 0.0017 |
| rs7607369 | A | G | 0.0110  | 0.0016 |
| rs7607490 | A | G | 0.0178  | 0.0029 |
| rs761423  | T | C | 0.0123  | 0.0017 |
| rs7615297 | C | G | 0.0143  | 0.0024 |
| rs7616371 | A | G | -0.0213 | 0.0037 |
| rs762147  | A | G | -0.0122 | 0.0019 |
| rs7640424 | T | C | -0.0125 | 0.0018 |
| rs765332  | T | G | -0.0246 | 0.0033 |
| rs7674623 | T | C | 0.0150  | 0.0022 |
| rs7683836 | A | G | -0.0116 | 0.0017 |
| rs7692088 | C | G | 0.0103  | 0.0018 |
| rs7694732 | A | G | 0.0115  | 0.0018 |
| rs769674  | A | T | 0.0120  | 0.0018 |
| rs7702514 | T | C | -0.1243 | 0.0061 |
| rs7710595 | A | C | 0.0115  | 0.0017 |
| rs7711753 | A | G | -0.0144 | 0.0016 |
| rs7715256 | T | G | -0.0150 | 0.0017 |
| rs7716275 | T | G | -0.0150 | 0.0021 |
| rs7727781 | T | C | 0.0099  | 0.0017 |
| rs7730004 | T | C | 0.0118  | 0.0019 |
| rs7730898 | A | G | 0.0129  | 0.0019 |
| rs7748777 | A | G | 0.0093  | 0.0016 |
| rs775731  | T | C | -0.0107 | 0.0017 |
| rs7760082 | A | G | -0.0125 | 0.0018 |
| rs7777102 | A | G | -0.0141 | 0.0024 |
| rs7779498 | T | C | -0.0328 | 0.0046 |
| rs7784465 | T | C | -0.0175 | 0.0025 |
| rs7796608 | A | G | 0.0154  | 0.0026 |

|           |   |   |         |        |
|-----------|---|---|---------|--------|
| rs7805441 | T | C | 0.0127  | 0.0018 |
| rs7827182 | C | G | 0.0155  | 0.0021 |
| rs7832003 | C | G | -0.0224 | 0.0027 |
| rs7844647 | T | C | 0.0126  | 0.0018 |
| rs785278  | A | T | -0.0148 | 0.0023 |
| rs7865157 | T | C | 0.0175  | 0.0028 |
| rs7869771 | A | C | 0.0133  | 0.0019 |
| rs7871866 | C | G | 0.0150  | 0.0025 |
| rs7874154 | T | C | -0.0119 | 0.0018 |
| rs7893571 | T | G | 0.0136  | 0.0018 |
| rs7899106 | A | G | -0.0317 | 0.0037 |
| rs7903146 | T | C | -0.0131 | 0.0020 |
| rs7919    | A | C | -0.0121 | 0.0018 |
| rs7924371 | T | C | -0.0498 | 0.0036 |
| rs793520  | A | G | 0.0124  | 0.0019 |
| rs7941030 | T | C | -0.0111 | 0.0017 |
| rs7948120 | T | C | -0.0132 | 0.0021 |
| rs7958206 | A | G | 0.0182  | 0.0030 |
| rs7965658 | A | G | -0.0140 | 0.0023 |
| rs7968230 | A | G | 0.0120  | 0.0018 |
| rs7973955 | A | G | -0.0116 | 0.0019 |
| rs7975187 | A | G | -0.0137 | 0.0021 |
| rs799132  | A | T | -0.0124 | 0.0021 |
| rs799449  | T | C | 0.0136  | 0.0017 |
| rs8016771 | T | G | -0.0217 | 0.0031 |
| rs8016859 | C | G | 0.0332  | 0.0044 |
| rs8024932 | T | G | 0.0213  | 0.0031 |
| rs8033510 | T | C | 0.0116  | 0.0018 |
| rs8036040 | A | C | 0.0109  | 0.0017 |
| rs8046061 | T | C | 0.0103  | 0.0017 |
| rs8047395 | A | G | 0.0410  | 0.0036 |

|           |   |   |         |        |
|-----------|---|---|---------|--------|
| rs8069296 | T | C | -0.0129 | 0.0021 |
| rs8070454 | T | C | -0.0101 | 0.0018 |
| rs8071182 | A | G | 0.0134  | 0.0022 |
| rs8075273 | A | C | -0.0114 | 0.0019 |
| rs8079034 | T | C | 0.0140  | 0.0024 |
| rs8081039 | T | C | 0.0241  | 0.0038 |
| rs8087550 | A | C | 0.0127  | 0.0021 |
| rs8089514 | A | T | 0.0138  | 0.0020 |
| rs8092503 | A | G | -0.0136 | 0.0020 |
| rs8094523 | A | G | -0.0440 | 0.0039 |
| rs8097544 | A | G | -0.0211 | 0.0025 |
| rs8102137 | T | C | -0.0187 | 0.0018 |
| rs8121840 | A | G | 0.0105  | 0.0018 |
| rs8123881 | A | G | -0.0222 | 0.0025 |
| rs816364  | A | G | -0.0111 | 0.0019 |
| rs816533  | A | G | -0.0308 | 0.0050 |
| rs820077  | A | G | 0.0279  | 0.0029 |
| rs823074  | T | C | 0.0118  | 0.0017 |
| rs825680  | A | T | 0.0107  | 0.0018 |
| rs827092  | T | C | 0.0121  | 0.0017 |
| rs845084  | A | G | 0.0129  | 0.0020 |
| rs847747  | T | G | -0.0113 | 0.0020 |
| rs849135  | A | G | 0.0117  | 0.0016 |
| rs853679  | A | C | 0.0728  | 0.0042 |
| rs8567    | A | G | -0.0099 | 0.0016 |
| rs868554  | C | G | -0.0172 | 0.0020 |
| rs874454  | A | G | -0.0139 | 0.0021 |
| rs879620  | T | C | 0.0156  | 0.0023 |
| rs881301  | T | C | -0.0101 | 0.0017 |
| rs884282  | T | C | -0.0108 | 0.0018 |
| rs886444  | A | G | -0.0130 | 0.0019 |

|           |   |   |         |        |
|-----------|---|---|---------|--------|
| rs889398  | T | C | -0.0182 | 0.0017 |
| rs892261  | T | C | -0.0122 | 0.0020 |
| rs895330  | C | G | 0.0199  | 0.0023 |
| rs900144  | T | C | 0.0161  | 0.0017 |
| rs901630  | T | C | -0.0103 | 0.0018 |
| rs902695  | A | G | -0.0136 | 0.0018 |
| rs903959  | A | T | 0.0107  | 0.0018 |
| rs905938  | T | C | -0.0161 | 0.0020 |
| rs907011  | T | G | 0.0115  | 0.0019 |
| rs9077    | A | G | -0.0158 | 0.0021 |
| rs912768  | C | G | 0.0421  | 0.0036 |
| rs919433  | A | G | 0.0142  | 0.0021 |
| rs925018  | C | G | -0.0115 | 0.0018 |
| rs925421  | A | G | 0.0132  | 0.0021 |
| rs9289499 | T | C | 0.0258  | 0.0033 |
| rs9291467 | T | C | 0.0129  | 0.0017 |
| rs9294260 | A | G | 0.0132  | 0.0017 |
| rs929641  | A | G | 0.0143  | 0.0020 |
| rs9299    | T | C | 0.0147  | 0.0019 |
| rs930295  | A | C | 0.0166  | 0.0024 |
| rs9332817 | C | G | -0.0347 | 0.0060 |
| rs934515  | A | G | 0.0178  | 0.0027 |
| rs9349239 | A | G | 0.0106  | 0.0018 |
| rs9362662 | A | G | 0.0112  | 0.0019 |
| rs9367368 | T | C | 0.0138  | 0.0018 |
| rs9370042 | C | G | -0.0183 | 0.0029 |
| rs9394312 | C | G | 0.0483  | 0.0034 |
| rs9396763 | A | C | 0.0135  | 0.0023 |
| rs9419958 | T | C | -0.0154 | 0.0026 |
| rs9426003 | A | G | -0.0112 | 0.0019 |
| rs9460306 | T | C | 0.0192  | 0.0032 |

|           |   |   |         |        |
|-----------|---|---|---------|--------|
| rs9463175 | T | C | -0.0115 | 0.0017 |
| rs946526  | T | C | -0.0319 | 0.0047 |
| rs9475173 | A | G | 0.0119  | 0.0020 |
| rs9507983 | T | C | -0.0133 | 0.0021 |
| rs952159  | A | G | 0.0180  | 0.0027 |
| rs9527706 | A | G | -0.0115 | 0.0020 |
| rs9530843 | A | C | 0.0140  | 0.0018 |
| rs9538141 | A | G | 0.0134  | 0.0019 |
| rs954018  | A | G | -0.0140 | 0.0018 |
| rs9540493 | A | G | 0.0169  | 0.0018 |
| rs9544915 | T | C | 0.0154  | 0.0025 |
| rs9554263 | C | G | -0.0122 | 0.0021 |
| rs9571687 | A | C | -0.0174 | 0.0020 |
| rs9595908 | T | C | 0.0158  | 0.0017 |
| rs9603697 | T | C | 0.0148  | 0.0018 |
| rs9615905 | T | C | 0.0103  | 0.0017 |
| rs9630985 | A | C | -0.0130 | 0.0019 |
| rs9657542 | C | G | 0.1020  | 0.0036 |
| rs9675376 | A | G | 0.0215  | 0.0022 |
| rs967605  | T | C | -0.0173 | 0.0024 |
| rs9688431 | T | C | 0.0222  | 0.0035 |
| rs968972  | A | G | 0.0108  | 0.0018 |
| rs972283  | A | G | 0.0096  | 0.0016 |
| rs972540  | A | G | -0.0117 | 0.0018 |
| rs977540  | A | G | 0.0120  | 0.0019 |
| rs9787495 | A | G | -0.0112 | 0.0019 |
| rs980329  | T | C | -0.0171 | 0.0021 |
| rs9806058 | A | T | 0.0150  | 0.0026 |
| rs9814633 | A | G | 0.0129  | 0.0018 |
| rs9816226 | A | T | -0.0235 | 0.0027 |
| rs9827072 | A | G | 0.1008  | 0.0055 |

|           |   |   |         |        |
|-----------|---|---|---------|--------|
| rs9832305 | T | C | -0.0228 | 0.0029 |
| rs9838283 | A | G | 0.1109  | 0.0049 |
| rs9846123 | T | C | 0.0494  | 0.0038 |
| rs984902  | A | T | 0.0188  | 0.0029 |
| rs987237  | A | G | -0.0393 | 0.0027 |
| rs9881036 | A | G | 0.0369  | 0.0034 |
| rs9905991 | A | G | 0.0106  | 0.0017 |
| rs9922708 | T | C | 0.0306  | 0.0032 |
| rs9927848 | A | C | -0.0130 | 0.0020 |
| rs9931407 | T | C | 0.0456  | 0.0058 |
| rs9931967 | T | G | 0.0149  | 0.0017 |
| rs993931  | A | G | -0.0112 | 0.0019 |
| rs993954  | T | G | 0.0115  | 0.0020 |
| rs9951893 | T | C | -0.0112 | 0.0018 |
| rs9961813 | A | C | 0.0449  | 0.0043 |
| rs9979651 | C | G | -0.0209 | 0.0035 |
| rs998584  | A | C | -0.0156 | 0.0018 |
| rs998732  | A | G | 0.0163  | 0.0022 |

| <b>TRIGLYCERIDES</b> |    |    |        |        |
|----------------------|----|----|--------|--------|
| SNP                  | A1 | A2 | Beta   | SE     |
| rs1004712            | C  | T  | 0.0206 | 0.0034 |
| rs10401969           | T  | C  | 0.121  | 0.0065 |
| rs10440120           | C  | A  | 0.0306 | 0.0044 |
| rs10501321           | T  | C  | 0.0216 | 0.0035 |
| rs10761762           | T  | C  | 0.027  | 0.0033 |
| rs10790162           | A  | G  | 0.2305 | 0.0065 |
| rs11057408           | G  | T  | 0.0258 | 0.0035 |
| rs11613352           | C  | T  | 0.028  | 0.0039 |
| rs11855284           | C  | T  | 0.0286 | 0.0042 |
| rs11974409           | A  | G  | 0.0899 | 0.0042 |

|            |   |   |        |        |
|------------|---|---|--------|--------|
| rs12294259 | T | C | 0.219  | 0.0069 |
| rs1260326  | T | C | 0.1148 | 0.0034 |
| rs12678919 | A | G | 0.1702 | 0.0056 |
| rs12708967 | C | T | 0.0289 | 0.0046 |
| rs12748152 | T | C | 0.0372 | 0.0059 |
| rs1321257  | G | A | 0.0402 | 0.0034 |
| rs13276972 | A | G | 0.0494 | 0.0035 |
| rs13389219 | C | T | 0.0271 | 0.0034 |
| rs16948098 | A | G | 0.08   | 0.0089 |
| rs174535   | C | T | 0.047  | 0.0034 |
| rs17513135 | T | C | 0.022  | 0.0039 |
| rs1800775  | C | A | 0.0396 | 0.0035 |
| rs1832007  | A | G | 0.0327 | 0.0047 |
| rs2068888  | G | A | 0.0241 | 0.0034 |
| rs2075650  | G | A | 0.0436 | 0.0049 |
| rs2250802  | A | G | 0.023  | 0.0037 |
| rs2665357  | C | A | 0.0212 | 0.0033 |
| rs2696089  | A | G | 0.0442 | 0.0072 |
| rs287621   | T | C | 0.0222 | 0.0037 |
| rs2954022  | C | A | 0.078  | 0.0033 |
| rs2972146  | T | G | 0.0281 | 0.0034 |
| rs2976940  | T | G | 0.0205 | 0.0034 |
| rs3130564  | C | T | 0.033  | 0.0046 |
| rs3198697  | C | T | 0.0198 | 0.0034 |
| rs3289     | C | T | 0.1447 | 0.0111 |
| rs3761445  | A | G | 0.0232 | 0.0034 |
| rs38855    | A | G | 0.0187 | 0.0033 |
| rs439401   | C | T | 0.0659 | 0.0038 |
| rs4417316  | C | T | 0.0475 | 0.0054 |
| rs442177   | T | G | 0.0309 | 0.0033 |
| rs4587594  | G | A | 0.0694 | 0.0035 |



|            |   |   |        |        |
|------------|---|---|--------|--------|
| rs4635554  | G | T | 0.0228 | 0.0038 |
| rs4646246  | G | A | 0.0285 | 0.0043 |
| rs4719841  | G | A | 0.0232 | 0.0034 |
| rs4738684  | A | G | 0.0205 | 0.0035 |
| rs4803750  | G | A | 0.0423 | 0.007  |
| rs4804311  | A | G | 0.0392 | 0.006  |
| rs4810479  | C | T | 0.0474 | 0.0038 |
| rs4871624  | G | T | 0.0254 | 0.0037 |
| rs588136   | C | T | 0.0495 | 0.0041 |
| rs589428   | G | T | 0.0335 | 0.0036 |
| rs6029143  | C | T | 0.0388 | 0.0071 |
| rs6066141  | T | C | 0.0297 | 0.0053 |
| rs634869   | T | C | 0.0272 | 0.0033 |
| rs645040   | T | G | 0.0293 | 0.004  |
| rs676210   | G | A | 0.0733 | 0.0039 |
| rs6831256  | G | A | 0.0258 | 0.0035 |
| rs6882076  | C | T | 0.0286 | 0.0035 |
| rs6995541  | G | A | 0.0265 | 0.0037 |
| rs719726   | T | C | 0.0199 | 0.0035 |
| rs7248104  | G | A | 0.0222 | 0.0034 |
| rs731839   | G | A | 0.0224 | 0.0036 |
| rs749671   | G | A | 0.0211 | 0.0034 |
| rs75919952 | C | T | 0.0683 | 0.0104 |
| rs76366838 | A | G | 0.1077 | 0.015  |
| rs7942717  | G | A | 0.0393 | 0.0067 |
| rs7943309  | G | A | 0.0605 | 0.0087 |
| rs799158   | T | C | 0.102  | 0.013  |
| rs8077889  | C | A | 0.0252 | 0.0042 |
| rs947988   | C | G | 0.0422 | 0.0061 |
| rs9686661  | T | C | 0.0379 | 0.0044 |
| rs998584   | A | C | 0.0293 | 0.0037 |

**HIGH DENSITY  
LIPOPROTEIN**

| SNP        | A1 | A2 | Beta   | SE     |
|------------|----|----|--------|--------|
| rs10019888 | A  | G  | 0.027  | 0.0046 |
| rs10087900 | G  | A  | 0.0231 | 0.0036 |
| rs102275   | T  | C  | 0.0391 | 0.0035 |
| rs103294   | T  | C  | 0.0523 | 0.0044 |
| rs10468017 | T  | C  | 0.1179 | 0.0038 |
| rs1047891  | C  | A  | 0.0269 | 0.0039 |
| rs10488698 | A  | G  | 0.061  | 0.0071 |
| rs10761771 | C  | T  | 0.0198 | 0.0034 |
| rs10808546 | T  | C  | 0.0409 | 0.0034 |
| rs11040329 | C  | T  | 0.038  | 0.0054 |
| rs11045163 | G  | A  | 0.0217 | 0.0035 |
| rs1121980  | G  | A  | 0.0196 | 0.0034 |
| rs11229606 | G  | T  | 0.0335 | 0.0051 |
| rs11246602 | C  | T  | 0.034  | 0.0052 |
| rs11765979 | C  | A  | 0.0412 | 0.0048 |
| rs11789603 | T  | C  | 0.06   | 0.006  |
| rs12133576 | A  | G  | 0.0243 | 0.0035 |
| rs12145743 | G  | T  | 0.0203 | 0.0036 |
| rs12291885 | C  | T  | 0.0857 | 0.0149 |
| rs12720917 | C  | T  | 0.0976 | 0.0055 |
| rs12740374 | T  | G  | 0.0343 | 0.0041 |
| rs12748152 | C  | T  | 0.0506 | 0.0062 |
| rs12801636 | A  | G  | 0.0235 | 0.0042 |
| rs13076253 | A  | C  | 0.0283 | 0.0048 |
| rs13107325 | C  | T  | 0.0708 | 0.0078 |
| rs13292026 | G  | A  | 0.0666 | 0.0108 |
| rs13326165 | A  | G  | 0.0289 | 0.0043 |
| rs13702    | C  | T  | 0.1058 | 0.0038 |

|            |   |   |        |        |
|------------|---|---|--------|--------|
| rs1515110  | G | T | 0.0323 | 0.0035 |
| rs1689797  | C | A | 0.0358 | 0.0036 |
| rs16942887 | A | G | 0.0831 | 0.0051 |
| rs17135399 | A | G | 0.0483 | 0.0077 |
| rs17145738 | T | C | 0.0408 | 0.0053 |
| rs17173637 | T | C | 0.0363 | 0.0057 |
| rs17695224 | G | A | 0.029  | 0.0039 |
| rs1800961  | C | T | 0.127  | 0.0099 |
| rs181360   | T | G | 0.0376 | 0.0042 |
| rs185481   | C | T | 0.0366 | 0.0035 |
| rs1877031  | A | G | 0.0336 | 0.0036 |
| rs1883025  | C | T | 0.0698 | 0.0041 |
| rs1936800  | C | T | 0.02   | 0.0034 |
| rs2013208  | T | C | 0.0254 | 0.0036 |
| rs2040293  | A | G | 0.0438 | 0.0039 |
| rs205262   | A | G | 0.0283 | 0.0039 |
| rs2075650  | A | G | 0.0554 | 0.0051 |
| rs2148489  | T | C | 0.0283 | 0.0041 |
| rs2241210  | G | A | 0.0332 | 0.0035 |
| rs2241770  | T | C | 0.0989 | 0.0057 |
| rs2250802  | G | A | 0.034  | 0.0038 |
| rs2278236  | A | G | 0.0331 | 0.0035 |
| rs2293889  | G | T | 0.0312 | 0.0035 |
| rs2454722  | G | A | 0.0351 | 0.0044 |
| rs2602836  | A | G | 0.0192 | 0.0034 |
| rs2606736  | C | T | 0.0246 | 0.0043 |
| rs2642438  | G | A | 0.0303 | 0.0039 |
| rs2853579  | T | G | 0.0499 | 0.0053 |
| rs289723   | C | A | 0.022  | 0.0038 |
| rs2925979  | C | T | 0.0351 | 0.0037 |
| rs3111576  | T | C | 0.0448 | 0.0054 |

|           |   |   |        |        |
|-----------|---|---|--------|--------|
| rs333947  | G | A | 0.0296 | 0.0047 |
| rs3741414 | T | C | 0.0296 | 0.004  |
| rs3822072 | G | A | 0.0251 | 0.0034 |
| rs3861397 | A | G | 0.024  | 0.0036 |
| rs3936511 | A | G | 0.0308 | 0.0046 |
| rs4142995 | G | T | 0.0263 | 0.0037 |
| rs4148005 | T | G | 0.0283 | 0.0036 |
| rs4240624 | A | G | 0.0818 | 0.0058 |
| rs4465830 | A | G | 0.0597 | 0.0044 |
| rs459193  | A | G | 0.0235 | 0.0039 |
| rs4599828 | T | C | 0.0232 | 0.0035 |
| rs4650994 | G | A | 0.021  | 0.0034 |
| rs4660293 | A | G | 0.0353 | 0.004  |
| rs4783961 | A | G | 0.0997 | 0.0036 |
| rs4783972 | C | A | 0.022  | 0.0036 |
| rs4846914 | A | G | 0.0479 | 0.0034 |
| rs4917014 | G | T | 0.0222 | 0.0036 |
| rs492571  | T | C | 0.0663 | 0.009  |
| rs4939883 | C | T | 0.0799 | 0.0045 |
| rs4969178 | G | A | 0.0263 | 0.0035 |
| rs499974  | C | A | 0.0263 | 0.0044 |
| rs5167    | G | T | 0.032  | 0.0037 |
| rs6450176 | G | A | 0.0254 | 0.0039 |
| rs653178  | T | C | 0.0263 | 0.0035 |
| rs6567160 | T | C | 0.0257 | 0.0041 |
| rs676210  | A | G | 0.066  | 0.004  |
| rs6805251 | T | C | 0.02   | 0.0035 |
| rs686030  | A | C | 0.055  | 0.0049 |
| rs687339  | C | T | 0.0316 | 0.0042 |
| rs7014168 | G | A | 0.0267 | 0.0041 |
| rs7016529 | T | C | 0.2186 | 0.0141 |

|                                |    |    |        |        |
|--------------------------------|----|----|--------|--------|
| rs702485                       | G  | A  | 0.0243 | 0.0034 |
| rs7117842                      | C  | T  | 0.0272 | 0.0035 |
| rs7128597                      | C  | A  | 0.0398 | 0.0065 |
| rs7179726                      | C  | T  | 0.022  | 0.0034 |
| rs7306660                      | G  | A  | 0.0345 | 0.0036 |
| rs731839                       | A  | G  | 0.022  | 0.0037 |
| rs737337                       | T  | C  | 0.0565 | 0.0061 |
| rs7607980                      | C  | T  | 0.0447 | 0.0052 |
| rs783149                       | C  | A  | 0.0313 | 0.0046 |
| rs7942717                      | A  | G  | 0.0397 | 0.0068 |
| rs7959530                      | C  | T  | 0.0281 | 0.0048 |
| rs7973683                      | A  | C  | 0.0286 | 0.0036 |
| rs8033940                      | A  | G  | 0.0978 | 0.0038 |
| rs8093249                      | A  | G  | 0.0384 | 0.0051 |
| rs838876                       | A  | G  | 0.0493 | 0.0039 |
| rs9457931                      | A  | G  | 0.0552 | 0.0073 |
| rs964184                       | C  | G  | 0.1065 | 0.0071 |
| rs970548                       | C  | A  | 0.0258 | 0.0039 |
| rs9955201                      | A  | G  | 0.0638 | 0.0081 |
| rs998584                       | C  | A  | 0.026  | 0.0038 |
| rs9989419                      | G  | A  | 0.1473 | 0.0036 |
| <b>LOW DENSITY LIPOPROTEIN</b> |    |    |        |        |
| SNP                            | A1 | A2 | Beta   | SE     |
| rs10102164                     | A  | G  | 0.0316 | 0.0045 |
| rs10195252                     | T  | C  | 0.0238 | 0.0039 |
| rs1025447                      | C  | T  | 0.0418 | 0.0048 |
| rs10401969                     | T  | C  | 0.1184 | 0.0072 |
| rs10403668                     | G  | A  | 0.0439 | 0.0052 |
| rs10490626                     | G  | A  | 0.0508 | 0.0069 |
| rs10832962                     | T  | C  | 0.032  | 0.004  |

|             |   |   |        |        |
|-------------|---|---|--------|--------|
| rs10893499  | A | G | 0.0521 | 0.0053 |
| rs10903129  | G | A | 0.0328 | 0.0037 |
| rs11206510  | T | C | 0.0831 | 0.005  |
| rs11485618  | A | G | 0.05   | 0.0039 |
| rs11563251  | T | C | 0.0345 | 0.0062 |
| rs11591147  | G | T | 0.497  | 0.018  |
| rs11600380  | T | C | 0.0558 | 0.0081 |
| rs1169288   | C | A | 0.0375 | 0.004  |
| rs117733303 | G | A | 0.1551 | 0.022  |
| rs1250229   | C | T | 0.0243 | 0.0042 |
| rs12670798  | C | T | 0.0344 | 0.0043 |
| rs12721109  | G | A | 0.4462 | 0.0183 |
| rs12748152  | T | C | 0.0499 | 0.0066 |
| rs12916     | C | T | 0.0733 | 0.0038 |
| rs12974306  | T | G | 0.0221 | 0.0037 |
| rs12983889  | A | G | 0.056  | 0.0068 |
| rs13206249  | G | A | 0.0378 | 0.0062 |
| rs13277801  | C | T | 0.0338 | 0.0038 |
| rs1367117   | A | G | 0.1186 | 0.004  |
| rs1475701   | C | T | 0.0904 | 0.0092 |
| rs1531517   | G | A | 0.2202 | 0.008  |
| rs1564348   | C | T | 0.0481 | 0.005  |
| rs16872670  | A | G | 0.0553 | 0.0084 |
| rs17404153  | G | T | 0.0336 | 0.0054 |
| rs174583    | C | T | 0.0522 | 0.0038 |
| rs1800562   | G | A | 0.0615 | 0.008  |
| rs1800961   | C | T | 0.0685 | 0.0106 |
| rs1883025   | C | T | 0.0296 | 0.0044 |
| rs2000999   | A | G | 0.065  | 0.0046 |
| rs2030746   | T | C | 0.0214 | 0.0038 |
| rs2073547   | G | A | 0.0485 | 0.0049 |

|           |   |   |        |        |
|-----------|---|---|--------|--------|
| rs2075650 | G | A | 0.1767 | 0.0055 |
| rs2328223 | C | A | 0.0299 | 0.005  |
| rs2419604 | A | G | 0.0302 | 0.004  |
| rs247616  | C | T | 0.0547 | 0.0041 |
| rs2587534 | A | G | 0.0391 | 0.0037 |
| rs2642438 | G | A | 0.0352 | 0.0042 |
| rs267733  | A | G | 0.0331 | 0.0053 |
| rs2710642 | A | G | 0.0239 | 0.0038 |
| rs2737252 | G | A | 0.0314 | 0.0041 |
| rs2886232 | T | C | 0.0451 | 0.0064 |
| rs289714  | G | A | 0.0358 | 0.0054 |
| rs2954029 | A | T | 0.0564 | 0.0036 |
| rs3125055 | A | T | 0.0468 | 0.0055 |
| rs3184504 | C | T | 0.0268 | 0.0038 |
| rs364585  | G | A | 0.0249 | 0.0038 |
| rs3745148 | G | A | 0.0497 | 0.0089 |
| rs3757354 | C | T | 0.0382 | 0.0044 |
| rs3780181 | A | G | 0.0445 | 0.0074 |
| rs4246169 | A | C | 0.0319 | 0.0051 |
| rs4253776 | G | A | 0.0311 | 0.0059 |
| rs4530754 | A | G | 0.0275 | 0.0036 |
| rs461473  | G | A | 0.0427 | 0.0064 |
| rs4665790 | T | A | 0.0259 | 0.0036 |
| rs4722551 | C | T | 0.0391 | 0.0049 |
| rs492602  | G | A | 0.0293 | 0.0039 |
| rs4927207 | G | A | 0.0692 | 0.0049 |
| rs4942486 | T | C | 0.0243 | 0.0037 |
| rs4970712 | C | A | 0.0339 | 0.0044 |
| rs520861  | G | A | 0.0843 | 0.0042 |
| rs5763662 | T | C | 0.0767 | 0.0121 |
| rs579459  | C | T | 0.0665 | 0.0045 |

|            |   |   |        |        |
|------------|---|---|--------|--------|
| rs6016373  | A | G | 0.0349 | 0.0037 |
| rs6065311  | C | T | 0.0417 | 0.0036 |
| rs646776   | T | C | 0.1602 | 0.0044 |
| rs6504872  | T | C | 0.0274 | 0.0037 |
| rs6511720  | G | T | 0.2209 | 0.0061 |
| rs6544713  | T | C | 0.0806 | 0.0041 |
| rs6818397  | T | G | 0.0224 | 0.004  |
| rs688      | T | C | 0.054  | 0.0037 |
| rs6882076  | C | T | 0.0456 | 0.0038 |
| rs6909746  | C | T | 0.0263 | 0.0037 |
| rs7254892  | G | A | 0.4853 | 0.0119 |
| rs7264396  | C | T | 0.0246 | 0.0045 |
| rs76366838 | A | G | 0.1704 | 0.0167 |
| rs7640978  | C | T | 0.0392 | 0.0069 |
| rs7774197  | C | A | 0.0508 | 0.0073 |
| rs780093   | T | C | 0.0223 | 0.0037 |
| rs7832643  | T | G | 0.0339 | 0.0038 |
| rs8017377  | A | G | 0.0303 | 0.0038 |
| rs964184   | G | C | 0.0855 | 0.0078 |
| rs9875338  | G | A | 0.027  | 0.0037 |
| rs9938506  | G | A | 0.0283 | 0.004  |
| rs9987289  | G | A | 0.0714 | 0.0066 |

| <b>EVER SMOKING</b> |    |    |         |        |
|---------------------|----|----|---------|--------|
| SNP                 | A1 | A2 | Beta    | SE     |
| rs10042827          | C  | T  | 0.0167  | 0.0027 |
| rs1004787           | A  | G  | 0.0284  | 0.0026 |
| rs10060196          | A  | C  | 0.0183  | 0.0026 |
| rs1008078           | T  | C  | 0.0228  | 0.0026 |
| rs1022376           | C  | T  | -0.0147 | 0.0026 |
| rs1022528           | A  | G  | 0.0174  | 0.0027 |



|            |   |   |         |        |
|------------|---|---|---------|--------|
| rs10233018 | G | A | 0.0246  | 0.0025 |
| rs10272990 | C | T | -0.0209 | 0.0027 |
| rs10279261 | A | G | -0.0189 | 0.0026 |
| rs1030015  | T | G | 0.0143  | 0.0026 |
| rs10446419 | G | A | -0.0196 | 0.0031 |
| rs10490159 | T | C | 0.0172  | 0.0026 |
| rs1050847  | T | C | -0.0148 | 0.0026 |
| rs1059490  | C | T | -0.0186 | 0.0026 |
| rs10698713 | A | G | -0.0335 | 0.0056 |
| rs10789369 | G | A | -0.0234 | 0.0026 |
| rs10805858 | T | A | 0.0181  | 0.0027 |
| rs10853981 | A | G | 0.0148  | 0.0027 |
| rs10858334 | G | C | 0.0229  | 0.0038 |
| rs10873871 | G | A | 0.0175  | 0.0031 |
| rs10885480 | C | T | -0.0187 | 0.0028 |
| rs10905461 | C | T | -0.0164 | 0.0029 |
| rs10914684 | A | G | -0.0158 | 0.0027 |
| rs10935779 | T | C | -0.0143 | 0.0026 |
| rs10945141 | A | G | 0.0181  | 0.0029 |
| rs10953957 | A | G | 0.0144  | 0.0026 |
| rs10966092 | C | T | -0.0205 | 0.0029 |
| rs10969352 | A | T | 0.0143  | 0.0025 |
| rs11057005 | G | A | -0.0157 | 0.0026 |
| rs1106363  | T | C | 0.0174  | 0.0027 |
| rs11076962 | C | T | 0.0183  | 0.0028 |
| rs11078713 | G | A | -0.0146 | 0.0026 |
| rs1108130  | A | T | 0.0239  | 0.0031 |
| rs1109480  | A | G | -0.0167 | 0.0026 |
| rs11128203 | A | T | 0.0204  | 0.0026 |
| rs11162019 | T | C | -0.0155 | 0.0026 |
| rs1116690  | G | A | 0.0163  | 0.0029 |

|             |   |   |         |        |
|-------------|---|---|---------|--------|
| rs11191269  | G | C | 0.0176  | 0.0032 |
| rs11192347  | A | G | -0.0265 | 0.0043 |
| rs11258417  | T | C | -0.0145 | 0.0026 |
| rs1126757   | T | C | 0.0142  | 0.0026 |
| rs112725451 | T | C | 0.0261  | 0.0034 |
| rs113230003 | A | G | -0.0189 | 0.0029 |
| rs114976176 | C | A | -0.0155 | 0.0027 |
| rs1150668   | G | T | -0.0185 | 0.0026 |
| rs11587399  | T | A | -0.0178 | 0.0031 |
| rs11594623  | C | T | 0.0274  | 0.0030 |
| rs1160685   | G | C | 0.0153  | 0.0026 |
| rs11611651  | A | G | 0.0271  | 0.0045 |
| rs11642231  | A | G | -0.0156 | 0.0026 |
| rs11651955  | A | G | -0.0140 | 0.0025 |
| rs11678980  | A | G | 0.0177  | 0.0026 |
| rs11692435  | A | G | 0.0251  | 0.0046 |
| rs11713899  | C | A | 0.0187  | 0.0034 |
| rs1173461   | T | C | 0.0166  | 0.0027 |
| rs117657830 | G | A | -0.0378 | 0.0064 |
| rs11766326  | C | T | -0.0175 | 0.0026 |
| rs11768481  | A | C | -0.0186 | 0.0027 |
| rs117734003 | C | G | 0.0303  | 0.0051 |
| rs11780471  | A | G | -0.0387 | 0.0052 |
| rs11783093  | T | C | -0.0471 | 0.0035 |
| rs11791671  | T | C | 0.0279  | 0.0051 |
| rs118202    | T | G | -0.0367 | 0.0033 |
| rs11872397  | A | G | -0.0171 | 0.0029 |
| rs1187820   | T | C | -0.0143 | 0.0026 |
| rs11889814  | C | A | -0.0210 | 0.0038 |
| rs11956866  | G | T | -0.0148 | 0.0026 |
| rs12022778  | C | A | 0.0268  | 0.0032 |

|            |   |   |         |        |
|------------|---|---|---------|--------|
| rs12027999 | C | T | -0.0244 | 0.0039 |
| rs12053870 | G | T | 0.0156  | 0.0026 |
| rs12130857 | A | G | -0.0180 | 0.0027 |
| rs12195240 | A | G | 0.0249  | 0.0028 |
| rs12244388 | A | G | 0.0258  | 0.0027 |
| rs12474587 | T | G | 0.0242  | 0.0026 |
| rs12517438 | G | T | 0.0154  | 0.0026 |
| rs12530388 | C | A | -0.0184 | 0.0025 |
| rs12563365 | A | G | 0.0166  | 0.0026 |
| rs12633090 | C | G | -0.0230 | 0.0033 |
| rs12642744 | T | G | -0.0166 | 0.0030 |
| rs12714017 | C | T | 0.0154  | 0.0026 |
| rs12739243 | C | T | -0.0213 | 0.0031 |
| rs12740789 | A | G | -0.0285 | 0.0033 |
| rs12755632 | G | A | -0.0154 | 0.0027 |
| rs12855717 | T | C | 0.0155  | 0.0026 |
| rs12878369 | A | C | 0.0174  | 0.0026 |
| rs12918191 | G | A | -0.0197 | 0.0030 |
| rs1291821  | G | A | 0.0145  | 0.0026 |
| rs13007361 | A | G | 0.0175  | 0.0031 |
| rs13066050 | T | C | 0.0188  | 0.0031 |
| rs13109980 | A | G | -0.0222 | 0.0027 |
| rs13110073 | C | T | -0.0246 | 0.0026 |
| rs13237637 | C | G | -0.0237 | 0.0025 |
| rs13261666 | T | G | -0.0200 | 0.0025 |
| rs13319205 | A | T | 0.0165  | 0.0028 |
| rs13392222 | C | A | -0.0234 | 0.0037 |
| rs13437771 | G | A | -0.0271 | 0.0035 |
| rs1373178  | G | T | -0.0203 | 0.0026 |
| rs1381287  | T | C | 0.0180  | 0.0026 |
| rs1381775  | C | T | -0.0156 | 0.0028 |

|             |   |   |         |        |
|-------------|---|---|---------|--------|
| rs1385108   | T | C | 0.0187  | 0.0030 |
| rs1389171   | A | T | -0.0175 | 0.0030 |
| rs13906     | T | C | -0.0245 | 0.0041 |
| rs139896    | C | T | 0.0154  | 0.0027 |
| rs1413119   | T | C | -0.0153 | 0.0026 |
| rs1435479   | T | G | 0.0164  | 0.0028 |
| rs1435672   | C | T | 0.0141  | 0.0026 |
| rs1435741   | A | G | 0.0183  | 0.0026 |
| rs1445649   | C | T | 0.0206  | 0.0026 |
| rs1449012   | T | C | -0.0154 | 0.0026 |
| rs147052174 | T | G | 0.0623  | 0.0098 |
| rs1514176   | A | G | -0.0193 | 0.0026 |
| rs1518393   | C | A | 0.0169  | 0.0026 |
| rs1549979   | T | C | -0.0245 | 0.0026 |
| rs1555445   | T | A | 0.0188  | 0.0027 |
| rs1561112   | C | T | -0.0152 | 0.0026 |
| rs1565735   | A | T | -0.0192 | 0.0032 |
| rs160631    | G | T | -0.0173 | 0.0029 |
| rs1632941   | C | T | -0.0158 | 0.0026 |
| rs16826827  | C | T | -0.0222 | 0.0039 |
| rs16828799  | T | G | 0.0198  | 0.0035 |
| rs1713676   | G | A | -0.0167 | 0.0026 |
| rs1714521   | C | A | -0.0163 | 0.0026 |
| rs17165769  | G | A | 0.0159  | 0.0026 |
| rs17197663  | A | G | -0.0216 | 0.0039 |
| rs1722666   | T | C | 0.0161  | 0.0029 |
| rs17229285  | T | C | -0.0155 | 0.0025 |
| rs1733760   | C | T | 0.0148  | 0.0025 |
| rs1737329   | G | C | 0.0170  | 0.0029 |
| rs17554906  | C | G | 0.0142  | 0.0026 |
| rs1759433   | A | G | 0.0154  | 0.0026 |

|            |   |   |         |        |
|------------|---|---|---------|--------|
| rs17616642 | G | A | -0.0166 | 0.0030 |
| rs17692129 | T | C | 0.0196  | 0.0027 |
| rs1772572  | A | C | -0.0169 | 0.0027 |
| rs1799068  | T | G | 0.0166  | 0.0026 |
| rs1811739  | A | G | 0.0183  | 0.0030 |
| rs1834306  | G | A | -0.0145 | 0.0026 |
| rs1863161  | A | G | 0.0153  | 0.0026 |
| rs1889571  | G | T | 0.0222  | 0.0038 |
| rs1901477  | G | A | 0.0304  | 0.0026 |
| rs1910236  | A | G | 0.0146  | 0.0026 |
| rs1927901  | C | T | -0.0142 | 0.0026 |
| rs1930371  | T | C | -0.0172 | 0.0030 |
| rs1931431  | C | G | 0.0182  | 0.0026 |
| rs1935571  | G | T | -0.0157 | 0.0026 |
| rs1937443  | G | C | 0.0204  | 0.0026 |
| rs1944689  | T | G | 0.0177  | 0.0031 |
| rs2010921  | A | G | 0.0174  | 0.0028 |
| rs2028269  | A | G | 0.0162  | 0.0026 |
| rs2063976  | T | C | -0.0202 | 0.0027 |
| rs2155646  | C | T | 0.0378  | 0.0026 |
| rs2173019  | A | T | 0.0282  | 0.0033 |
| rs2196356  | C | G | -0.0188 | 0.0028 |
| rs221988   | C | A | -0.0149 | 0.0026 |
| rs2276825  | C | T | 0.0189  | 0.0030 |
| rs2279829  | T | C | -0.0174 | 0.0031 |
| rs2289791  | T | G | -0.0177 | 0.0030 |
| rs2306866  | T | A | -0.0167 | 0.0026 |
| rs2319545  | A | C | 0.0232  | 0.0036 |
| rs2344976  | C | T | -0.0151 | 0.0026 |
| rs2378662  | A | G | 0.0152  | 0.0026 |
| rs238896   | A | G | -0.0169 | 0.0025 |

|            |   |   |         |        |
|------------|---|---|---------|--------|
| rs2526390  | T | C | 0.0205  | 0.0027 |
| rs2539706  | A | G | 0.0162  | 0.0026 |
| rs2637869  | A | G | 0.0182  | 0.0028 |
| rs2710634  | C | T | -0.0178 | 0.0026 |
| rs2734390  | G | A | 0.0148  | 0.0026 |
| rs2796793  | A | G | 0.0145  | 0.0026 |
| rs281296   | A | G | 0.0247  | 0.0027 |
| rs28408682 | G | A | 0.0167  | 0.0026 |
| rs28441558 | C | T | -0.0356 | 0.0055 |
| rs28717373 | T | C | -0.0165 | 0.0027 |
| rs2901785  | A | G | -0.0173 | 0.0026 |
| rs290601   | T | C | 0.0163  | 0.0029 |
| rs2925128  | T | C | 0.0168  | 0.0027 |
| rs2938134  | A | C | -0.0175 | 0.0028 |
| rs2939756  | A | G | -0.0157 | 0.0026 |
| rs2952251  | G | A | 0.0164  | 0.0030 |
| rs2959084  | A | G | 0.0171  | 0.0028 |
| rs301807   | G | A | 0.0180  | 0.0026 |
| rs3098272  | C | A | -0.0178 | 0.0032 |
| rs3115418  | C | T | -0.0142 | 0.0026 |
| rs3172494  | T | G | -0.0291 | 0.0040 |
| rs3218116  | T | C | -0.0198 | 0.0029 |
| rs329124   | G | A | -0.0164 | 0.0026 |
| rs34342129 | C | T | -0.0143 | 0.0025 |
| rs34399632 | G | A | 0.0194  | 0.0030 |
| rs34553878 | G | A | 0.0247  | 0.0041 |
| rs34940743 | G | A | 0.0159  | 0.0027 |
| rs34970111 | T | C | -0.0146 | 0.0026 |
| rs35375873 | C | G | -0.0270 | 0.0041 |
| rs35656245 | A | G | 0.0159  | 0.0029 |
| rs357304   | C | T | 0.0167  | 0.0029 |

|            |   |   |         |        |
|------------|---|---|---------|--------|
| rs359247   | T | A | 0.0220  | 0.0027 |
| rs359431   | T | C | -0.0142 | 0.0026 |
| rs3740977  | C | T | 0.0195  | 0.0034 |
| rs3764351  | A | G | -0.0147 | 0.0027 |
| rs3800227  | G | A | 0.0172  | 0.0029 |
| rs3810496  | C | T | 0.0159  | 0.0026 |
| rs3811038  | C | T | 0.0191  | 0.0028 |
| rs3820277  | T | G | -0.0188 | 0.0026 |
| rs3843905  | T | C | -0.0151 | 0.0026 |
| rs3847244  | T | C | 0.0187  | 0.0026 |
| rs3850736  | G | C | 0.0191  | 0.0026 |
| rs3909281  | G | T | 0.0211  | 0.0026 |
| rs3934797  | A | G | -0.0213 | 0.0033 |
| rs4044321  | G | A | -0.0226 | 0.0027 |
| rs4140932  | A | T | -0.0140 | 0.0026 |
| rs42417    | T | C | 0.0169  | 0.0028 |
| rs4264267  | T | C | 0.0148  | 0.0026 |
| rs4275621  | G | A | -0.0214 | 0.0026 |
| rs4310804  | G | C | -0.0182 | 0.0030 |
| rs4326350  | G | C | -0.0176 | 0.0026 |
| rs4476253  | A | G | -0.0185 | 0.0030 |
| rs4543050  | T | A | 0.0222  | 0.0033 |
| rs45444697 | G | C | 0.0197  | 0.0031 |
| rs4674916  | A | C | -0.0180 | 0.0027 |
| rs4674993  | G | A | -0.0240 | 0.0032 |
| rs4727189  | C | T | 0.0149  | 0.0027 |
| rs4752018  | A | C | 0.0189  | 0.0030 |
| rs4759229  | G | A | 0.0156  | 0.0027 |
| rs4785187  | A | G | 0.0200  | 0.0031 |
| rs4788676  | C | T | -0.0177 | 0.0030 |
| rs4790874  | T | C | 0.0174  | 0.0026 |

|            |   |   |         |        |
|------------|---|---|---------|--------|
| rs4818005  | A | G | -0.0204 | 0.0026 |
| rs4822102  | T | C | -0.0165 | 0.0026 |
| rs4837631  | T | C | -0.0154 | 0.0026 |
| rs4877285  | A | G | -0.0181 | 0.0027 |
| rs4886207  | C | T | -0.0162 | 0.0026 |
| rs4912332  | T | C | 0.0141  | 0.0025 |
| rs540860   | G | A | 0.0176  | 0.0026 |
| rs55786907 | G | A | 0.0194  | 0.0035 |
| rs55913542 | T | G | 0.0186  | 0.0034 |
| rs55944129 | C | T | -0.0176 | 0.0029 |
| rs56208390 | G | A | 0.0216  | 0.0039 |
| rs56367474 | T | C | -0.0173 | 0.0028 |
| rs56902655 | G | T | -0.0219 | 0.0037 |
| rs57153235 | G | T | -0.0194 | 0.0027 |
| rs58400863 | A | G | -0.0202 | 0.0027 |
| rs586699   | A | G | -0.0148 | 0.0026 |
| rs59537158 | T | C | 0.0225  | 0.0031 |
| rs6011779  | T | C | -0.0192 | 0.0032 |
| rs6050446  | G | A | 0.0544  | 0.0076 |
| rs6058782  | T | C | 0.0297  | 0.0044 |
| rs6073075  | A | T | -0.0187 | 0.0034 |
| rs60833441 | G | A | -0.0143 | 0.0026 |
| rs61533748 | C | T | 0.0174  | 0.0026 |
| rs61884449 | T | C | 0.0200  | 0.0036 |
| rs61886926 | T | C | -0.0179 | 0.0026 |
| rs619087   | G | A | 0.0143  | 0.0026 |
| rs61959481 | A | G | -0.0203 | 0.0031 |
| rs62007780 | T | G | -0.0159 | 0.0026 |
| rs62052916 | T | A | -0.0319 | 0.0050 |
| rs62098013 | A | G | 0.0177  | 0.0026 |
| rs62137126 | G | A | -0.0237 | 0.0039 |



|            |   |   |         |        |
|------------|---|---|---------|--------|
| rs62180324 | A | G | -0.0195 | 0.0031 |
| rs62193862 | A | G | 0.0238  | 0.0042 |
| rs62246017 | A | G | -0.0162 | 0.0027 |
| rs62340589 | C | G | 0.0174  | 0.0032 |
| rs62618693 | T | C | -0.0353 | 0.0063 |
| rs6265     | T | C | -0.0293 | 0.0033 |
| rs6437769  | T | C | 0.0142  | 0.0026 |
| rs6438436  | T | C | 0.0247  | 0.0033 |
| rs644740   | T | C | -0.0141 | 0.0026 |
| rs6452785  | T | C | -0.0269 | 0.0026 |
| rs6474609  | A | T | -0.0156 | 0.0026 |
| rs6497840  | A | G | 0.0228  | 0.0029 |
| rs6568832  | A | G | 0.0189  | 0.0030 |
| rs67050670 | G | A | -0.0203 | 0.0030 |
| rs6730325  | A | G | -0.0146 | 0.0026 |
| rs6731872  | G | T | 0.0316  | 0.0034 |
| rs6750107  | A | G | 0.0146  | 0.0026 |
| rs6750529  | T | C | 0.0199  | 0.0029 |
| rs6756212  | T | C | -0.0339 | 0.0026 |
| rs67777803 | T | G | -0.0246 | 0.0034 |
| rs6782116  | T | C | -0.0147 | 0.0026 |
| rs6874731  | G | T | 0.0153  | 0.0025 |
| rs6890961  | T | C | -0.0193 | 0.0026 |
| rs6932350  | A | T | 0.0150  | 0.0026 |
| rs6936160  | T | C | 0.0201  | 0.0028 |
| rs6948707  | G | T | 0.0243  | 0.0026 |
| rs6968380  | A | G | -0.0234 | 0.0027 |
| rs6986430  | C | T | -0.0243 | 0.0031 |
| rs6993429  | A | C | -0.0191 | 0.0026 |
| rs7024924  | C | T | 0.0189  | 0.0034 |
| rs7026534  | G | T | -0.0166 | 0.0028 |

|            |   |   |         |        |
|------------|---|---|---------|--------|
| rs7072776  | G | A | -0.0220 | 0.0028 |
| rs7134009  | C | T | -0.0158 | 0.0029 |
| rs71367544 | T | C | 0.0206  | 0.0032 |
| rs71592686 | C | T | 0.0207  | 0.0029 |
| rs71602617 | T | C | -0.0178 | 0.0032 |
| rs7188873  | G | A | 0.0203  | 0.0026 |
| rs7192140  | C | T | -0.0169 | 0.0025 |
| rs72780746 | C | T | -0.0258 | 0.0034 |
| rs72789626 | A | T | -0.0256 | 0.0037 |
| rs72790288 | A | G | -0.0455 | 0.0077 |
| rs72898831 | G | A | -0.0244 | 0.0035 |
| rs72938304 | A | G | -0.0272 | 0.0040 |
| rs73008357 | C | A | -0.0223 | 0.0040 |
| rs7333559  | A | G | -0.0232 | 0.0031 |
| rs73831818 | G | A | 0.0320  | 0.0055 |
| rs74697736 | A | G | 0.0223  | 0.0028 |
| rs748832   | G | A | 0.0172  | 0.0026 |
| rs7505855  | T | C | -0.0170 | 0.0026 |
| rs75210106 | T | C | -0.0187 | 0.0033 |
| rs75674569 | A | G | -0.0253 | 0.0043 |
| rs7585579  | G | C | 0.0204  | 0.0026 |
| rs75919030 | C | T | -0.0210 | 0.0029 |
| rs7598402  | G | C | -0.0147 | 0.0025 |
| rs7600835  | A | G | -0.0151 | 0.0027 |
| rs7631379  | C | T | 0.0208  | 0.0032 |
| rs7640107  | T | C | -0.0142 | 0.0026 |
| rs7657022  | G | A | 0.0183  | 0.0025 |
| rs76841737 | G | C | -0.0231 | 0.0042 |
| rs7696257  | A | G | 0.0153  | 0.0026 |
| rs77215829 | C | A | -0.0240 | 0.0038 |
| rs77283305 | A | G | -0.0152 | 0.0028 |

|            |   |   |         |        |
|------------|---|---|---------|--------|
| rs7743165  | G | T | 0.0193  | 0.0025 |
| rs7802996  | T | C | -0.0209 | 0.0034 |
| rs7809303  | A | G | -0.0214 | 0.0027 |
| rs7836565  | T | C | -0.0155 | 0.0028 |
| rs7867822  | G | A | -0.0151 | 0.0027 |
| rs7901883  | A | G | -0.0193 | 0.0030 |
| rs7920501  | A | T | -0.0155 | 0.0026 |
| rs7921378  | C | G | -0.0233 | 0.0025 |
| rs7929518  | G | A | 0.0192  | 0.0030 |
| rs7943721  | A | G | -0.0212 | 0.0034 |
| rs79476395 | G | A | 0.0334  | 0.0049 |
| rs7969559  | G | A | -0.0170 | 0.0028 |
| rs8005334  | G | T | 0.0167  | 0.0027 |
| rs8027457  | C | T | 0.0153  | 0.0025 |
| rs8050598  | T | C | 0.0187  | 0.0029 |
| rs8083764  | T | G | -0.0160 | 0.0028 |
| rs8096225  | C | A | 0.0155  | 0.0028 |
| rs8103660  | C | T | 0.0158  | 0.0027 |
| rs876793   | C | T | -0.0179 | 0.0027 |
| rs910912   | C | T | -0.0168 | 0.0029 |
| rs925524   | G | A | 0.0156  | 0.0028 |
| rs9288999  | A | G | 0.0174  | 0.0029 |
| rs9302604  | G | A | 0.0187  | 0.0026 |
| rs9323328  | G | A | -0.0142 | 0.0026 |
| rs951740   | A | G | 0.0295  | 0.0026 |
| rs9538162  | C | T | 0.0174  | 0.0026 |
| rs9540731  | T | C | -0.0177 | 0.0025 |
| rs9545155  | C | T | -0.0161 | 0.0026 |
| rs963354   | A | C | 0.0150  | 0.0027 |
| rs9787523  | C | T | -0.0156 | 0.0026 |
| rs9826984  | A | G | -0.0141 | 0.0026 |

|           |   |   |         |        |
|-----------|---|---|---------|--------|
| rs9841807 | T | C | 0.0163  | 0.0029 |
| rs9850597 | A | G | -0.0186 | 0.0033 |
| rs986714  | T | A | -0.0160 | 0.0026 |
| rs9922607 | T | C | -0.0222 | 0.0032 |
| rs9936784 | G | T | 0.0140  | 0.0026 |
| rs9941217 | G | C | -0.0186 | 0.0027 |
| rs9987376 | G | T | -0.0205 | 0.0026 |

| <b>TYPE 2 DIABETES</b> |    |    |        |        |
|------------------------|----|----|--------|--------|
| SNP                    | A1 | A2 | Beta   | SE     |
| rs1005752              | A  | C  | 0.0770 | 0.0047 |
| rs10096633             | C  | T  | 0.0677 | 0.0096 |
| rs10097617             | T  | C  | 0.0392 | 0.0049 |
| rs10195252             | T  | C  | 0.0677 | 0.0048 |
| rs10228066             | T  | C  | 0.0677 | 0.0048 |
| rs10406327             | C  | G  | 0.0392 | 0.0099 |
| rs10406431             | A  | G  | 0.0488 | 0.0049 |
| rs1061810              | A  | C  | 0.0488 | 0.0049 |
| rs10811660             | G  | A  | 0.2390 | 0.0122 |
| rs10830963             | G  | C  | 0.0953 | 0.0047 |
| rs10842994             | C  | T  | 0.0770 | 0.0095 |
| rs10882101             | T  | C  | 0.0583 | 0.0097 |
| rs10908278             | T  | A  | 0.0770 | 0.0047 |
| rs10937721             | C  | G  | 0.0583 | 0.0097 |
| rs10938398             | A  | G  | 0.0488 | 0.0098 |
| rs10954772             | T  | C  | 0.0392 | 0.0049 |
| rs10974438             | C  | A  | 0.0488 | 0.0049 |
| rs11070332             | A  | G  | 0.0488 | 0.0049 |
| rs11137820             | C  | G  | 0.0392 | 0.0099 |
| rs11257655             | T  | C  | 0.0862 | 0.0047 |
| rs1127215              | C  | T  | 0.0488 | 0.0049 |

|             |   |   |        |        |
|-------------|---|---|--------|--------|
| rs11496066  | T | C | 0.0770 | 0.0144 |
| rs115505614 | T | C | 0.1740 | 0.0174 |
| rs11642430  | G | C | 0.0392 | 0.0049 |
| rs11688682  | G | C | 0.0488 | 0.0098 |
| rs11699802  | C | T | 0.0392 | 0.0049 |
| rs117001013 | C | T | 0.0677 | 0.0145 |
| rs11708067  | A | G | 0.0862 | 0.0047 |
| rs11709077  | G | A | 0.1310 | 0.0136 |
| rs117483894 | G | A | 0.0953 | 0.0189 |
| rs11759026  | G | A | 0.0677 | 0.0096 |
| rs11820019  | T | C | 0.1484 | 0.0225 |
| rs11842871  | G | T | 0.0392 | 0.0049 |
| rs11926707  | C | T | 0.2390 | 0.0418 |
| rs12001437  | C | T | 0.0392 | 0.0049 |
| rs12048743  | G | C | 0.0392 | 0.0049 |
| rs12140153  | G | T | 0.0677 | 0.0145 |
| rs1260326   | C | T | 0.0677 | 0.0048 |
| rs12640250  | C | A | 0.0392 | 0.0049 |
| rs12680028  | C | G | 0.0392 | 0.0099 |
| rs12811407  | A | G | 0.0488 | 0.0049 |
| rs12910825  | G | A | 0.0488 | 0.0049 |
| rs12920022  | A | T | 0.0488 | 0.0049 |
| rs1296328   | A | C | 0.0392 | 0.0099 |
| rs13041756  | C | T | 0.0583 | 0.0097 |
| rs13085136  | C | T | 0.0770 | 0.0144 |
| rs1316776   | C | A | 0.0488 | 0.0098 |
| rs13262861  | C | A | 0.0677 | 0.0096 |
| rs13426680  | A | G | 0.0862 | 0.0142 |
| rs1359790   | G | A | 0.0862 | 0.0094 |
| rs13737     | G | T | 0.0488 | 0.0098 |
| rs1377807   | C | G | 0.0488 | 0.0049 |

|             |   |   |        |        |
|-------------|---|---|--------|--------|
| rs1412234   | C | T | 0.0392 | 0.0049 |
| rs141521721 | A | C | 0.1222 | 0.0231 |
| rs1421085   | C | T | 0.1222 | 0.0045 |
| rs1426371   | G | A | 0.0488 | 0.0049 |
| rs145678014 | G | T | 0.1044 | 0.0187 |
| rs1493694   | T | C | 0.0862 | 0.0094 |
| rs1531583   | T | G | 0.1222 | 0.0184 |
| rs1561927   | C | T | 0.0392 | 0.0049 |
| rs1562396   | G | A | 0.0583 | 0.0048 |
| rs1580278   | C | A | 0.0392 | 0.0049 |
| rs1708302   | C | T | 0.0953 | 0.0094 |
| rs17122772  | G | C | 0.0392 | 0.0049 |
| rs17522122  | T | G | 0.0392 | 0.0049 |
| rs17684074  | G | C | 0.0392 | 0.0049 |
| rs17689007  | G | A | 0.0392 | 0.0049 |
| rs17791513  | A | G | 0.0953 | 0.0094 |
| rs17802463  | G | T | 0.0392 | 0.0049 |
| rs1783541   | T | C | 0.0583 | 0.0048 |
| rs17836088  | C | G | 0.0583 | 0.0097 |
| rs1796330   | G | C | 0.0488 | 0.0049 |
| rs1800961   | T | C | 0.1655 | 0.0131 |
| rs1903002   | G | C | 0.0392 | 0.0099 |
| rs2102278   | G | A | 0.0392 | 0.0099 |
| rs2197973   | T | C | 0.0392 | 0.0099 |
| rs2237895   | C | A | 0.1133 | 0.0046 |
| rs2249105   | A | G | 0.0953 | 0.0094 |
| rs2258238   | T | A | 0.0953 | 0.0094 |
| rs2268078   | A | G | 0.0392 | 0.0049 |
| rs2272163   | C | A | 0.0392 | 0.0099 |
| rs2280141   | T | G | 0.0488 | 0.0098 |
| rs2307111   | T | C | 0.0488 | 0.0049 |

|            |   |   |        |        |
|------------|---|---|--------|--------|
| rs243024   | A | G | 0.0583 | 0.0048 |
| rs2456530  | T | C | 0.0583 | 0.0097 |
| rs2581787  | T | G | 0.0392 | 0.0099 |
| rs2642588  | G | T | 0.0488 | 0.0049 |
| rs2767036  | C | A | 0.0392 | 0.0099 |
| rs2796441  | G | A | 0.0677 | 0.0096 |
| rs2800733  | A | G | 0.0488 | 0.0098 |
| rs2820446  | C | G | 0.0583 | 0.0097 |
| rs2872246  | A | C | 0.0392 | 0.0099 |
| rs28819812 | C | A | 0.0392 | 0.0049 |
| rs291367   | G | A | 0.0392 | 0.0049 |
| rs2925979  | T | C | 0.0488 | 0.0049 |
| rs2972144  | G | A | 0.0953 | 0.0094 |
| rs3111316  | A | G | 0.0488 | 0.0098 |
| rs329122   | A | G | 0.0392 | 0.0049 |
| rs340874   | C | T | 0.0677 | 0.0096 |
| rs34298980 | T | C | 0.0392 | 0.0049 |
| rs34454109 | A | T | 0.0392 | 0.0049 |
| rs34584161 | A | G | 0.0488 | 0.0098 |
| rs34715063 | C | T | 0.0953 | 0.0141 |
| rs348330   | G | A | 0.0488 | 0.0049 |
| rs34855406 | C | G | 0.0488 | 0.0049 |
| rs34965774 | A | G | 0.0583 | 0.0097 |
| rs35352848 | T | C | 0.0677 | 0.0096 |
| rs35895680 | C | A | 0.0583 | 0.0097 |
| rs35999103 | T | C | 0.0488 | 0.0098 |
| rs362307   | T | C | 0.0770 | 0.0144 |
| rs3751837  | T | C | 0.0392 | 0.0049 |
| rs3772071  | T | C | 0.0488 | 0.0098 |
| rs3774723  | G | A | 0.0677 | 0.0096 |
| rs3798519  | C | A | 0.0583 | 0.0097 |

|            |   |   |        |        |
|------------|---|---|--------|--------|
| rs3802177  | G | A | 0.1044 | 0.0046 |
| rs3810291  | A | G | 0.0488 | 0.0098 |
| rs3811978  | G | A | 0.0583 | 0.0097 |
| rs3887925  | T | C | 0.0677 | 0.0096 |
| rs39328    | T | C | 0.0392 | 0.0099 |
| rs4148856  | C | G | 0.0488 | 0.0098 |
| rs4279506  | G | C | 0.0583 | 0.0097 |
| rs429358   | T | C | 0.0770 | 0.0095 |
| rs4457053  | G | A | 0.0583 | 0.0048 |
| rs465002   | T | C | 0.1044 | 0.0093 |
| rs4686471  | C | T | 0.0583 | 0.0048 |
| rs4688760  | T | C | 0.0392 | 0.0049 |
| rs4709746  | C | T | 0.0583 | 0.0097 |
| rs474513   | A | G | 0.0392 | 0.0049 |
| rs4776970  | A | T | 0.0392 | 0.0049 |
| rs4804833  | A | G | 0.0488 | 0.0098 |
| rs4925109  | A | G | 0.0488 | 0.0098 |
| rs4929965  | A | G | 0.0677 | 0.0048 |
| rs4932265  | T | C | 0.0677 | 0.0096 |
| rs4946812  | G | A | 0.0392 | 0.0049 |
| rs4977213  | C | T | 0.0488 | 0.0049 |
| rs505922   | C | T | 0.0488 | 0.0098 |
| rs523288   | T | A | 0.0488 | 0.0049 |
| rs539515   | C | A | 0.0488 | 0.0049 |
| rs55653563 | A | C | 0.0392 | 0.0049 |
| rs56337234 | C | T | 0.0583 | 0.0097 |
| rs56348580 | G | C | 0.0488 | 0.0049 |
| rs57327348 | A | T | 0.0392 | 0.0099 |
| rs5758223  | A | G | 0.0392 | 0.0049 |
| rs576674   | G | A | 0.0488 | 0.0049 |
| rs58432198 | C | T | 0.0677 | 0.0096 |



|            |   |   |        |        |
|------------|---|---|--------|--------|
| rs58730668 | T | C | 0.0677 | 0.0096 |
| rs601945   | G | A | 0.0583 | 0.0097 |
| rs60276348 | T | C | 0.0488 | 0.0098 |
| rs6063048  | G | A | 0.0488 | 0.0098 |
| rs6070625  | G | C | 0.0488 | 0.0049 |
| rs61676547 | C | G | 0.0583 | 0.0097 |
| rs62007683 | G | T | 0.0392 | 0.0099 |
| rs62080313 | C | T | 0.0583 | 0.0097 |
| rs62271373 | A | T | 0.0862 | 0.0142 |
| rs62492368 | A | G | 0.0488 | 0.0098 |
| rs6458354  | C | T | 0.0488 | 0.0049 |
| rs6459733  | G | C | 0.0583 | 0.0048 |
| rs649961   | T | C | 0.0392 | 0.0049 |
| rs6518681  | G | A | 0.0862 | 0.0142 |
| rs6545714  | G | A | 0.0392 | 0.0099 |
| rs6600191  | T | C | 0.0583 | 0.0048 |
| rs67232546 | T | C | 0.0583 | 0.0097 |
| rs6780171  | A | T | 0.1310 | 0.0090 |
| rs6821438  | A | G | 0.0392 | 0.0049 |
| rs6884702  | G | A | 0.0392 | 0.0049 |
| rs6976111  | A | C | 0.0392 | 0.0049 |
| rs7022807  | G | A | 0.0392 | 0.0049 |
| rs702634   | A | G | 0.0488 | 0.0049 |
| rs703972   | G | C | 0.0677 | 0.0048 |
| rs7115753  | A | G | 0.0392 | 0.0049 |
| rs7124681  | A | C | 0.0392 | 0.0049 |
| rs71372253 | C | T | 0.0770 | 0.0144 |
| rs7178762  | C | T | 0.0392 | 0.0049 |
| rs718314   | G | A | 0.0488 | 0.0098 |
| rs7222481  | C | G | 0.0392 | 0.0049 |
| rs7240767  | C | T | 0.0392 | 0.0099 |

|            |   |   |        |        |
|------------|---|---|--------|--------|
| rs7249758  | A | G | 0.0488 | 0.0098 |
| rs72802342 | C | A | 0.1570 | 0.0133 |
| rs72926932 | C | A | 0.0862 | 0.0094 |
| rs738408   | T | C | 0.0488 | 0.0098 |
| rs75253922 | C | T | 0.0488 | 0.0098 |
| rs76263492 | T | G | 0.0862 | 0.0142 |
| rs7629630  | A | T | 0.0488 | 0.0098 |
| rs7669833  | T | A | 0.0583 | 0.0097 |
| rs7719891  | G | A | 0.0392 | 0.0049 |
| rs77464186 | A | C | 0.1044 | 0.0093 |
| rs7756992  | G | A | 0.1398 | 0.0090 |
| rs77864822 | A | G | 0.0770 | 0.0144 |
| rs7867635  | C | T | 0.0392 | 0.0099 |
| rs7903146  | T | C | 0.3148 | 0.0075 |
| rs7987740  | T | C | 0.0392 | 0.0099 |
| rs8010382  | G | A | 0.0392 | 0.0049 |
| rs80147536 | A | T | 0.1222 | 0.0091 |
| rs8017808  | G | T | 0.0392 | 0.0049 |
| rs8037894  | G | C | 0.0488 | 0.0098 |
| rs8046545  | G | A | 0.0392 | 0.0099 |
| rs8107974  | T | A | 0.0953 | 0.0141 |
| rs862320   | C | T | 0.0392 | 0.0049 |
| rs878521   | A | G | 0.0583 | 0.0097 |
| rs917195   | C | T | 0.0488 | 0.0049 |
| rs9379084  | G | A | 0.1044 | 0.0140 |
| rs9430095  | C | G | 0.0392 | 0.0099 |
| rs9494624  | A | G | 0.0392 | 0.0049 |
| rs9537803  | C | T | 0.0392 | 0.0049 |
| rs9563615  | A | T | 0.0488 | 0.0098 |
| rs963740   | A | T | 0.0392 | 0.0049 |
| rs9828772  | C | G | 0.0583 | 0.0097 |

|                       |    |    |          |          |         |
|-----------------------|----|----|----------|----------|---------|
| rs9860730             | A  | G  | 0.0583   | 0.0097   |         |
| rs9873618             | G  | A  | 0.0677   | 0.0096   |         |
| rs9957145             | G  | A  | 0.0488   | 0.0098   |         |
| <b>BLOOD PRESSURE</b> |    |    |          |          |         |
| SNP                   | A1 | A2 | Beta_SBP | Beta_DBP | Beta_PP |
| rs10057188            | G  | A  | 0.182    | 0.03     | 0.153   |
| rs10103353            | C  | T  | 0.18     | 0.147    | 0.04    |
| rs1015538             | A  | G  | 0.098    | 0.137    | -0.03   |
| rs10198275            | A  | C  | 0.171    | 0.135    | 0.046   |
| rs10199082            | T  | C  | 0.121    | -0.15    | 0.26    |
| rs10418305            | C  | G  | -0.225   | 0.125    | -0.33   |
| rs1053711             | G  | A  | 0.079    | 0.153    | -0.073  |
| rs1063281             | C  | T  | 0.247    | 0.17     | 0.083   |
| rs10747570            | A  | G  | 0.256    | 0.184    | 0.066   |
| rs10751962            | C  | T  | -0.242   | -0.219   | -0.025  |
| rs10784502            | C  | T  | -0.235   | -0.043   | -0.188  |
| rs10818775            | C  | T  | 0.332    | 0.052    | 0.263   |
| rs10838433            | G  | A  | -0.144   | 0.057    | -0.195  |
| rs10859580            | A  | T  | -0.113   | 0.044    | -0.143  |
| rs10958717            | G  | C  | -0.113   | 0.042    | -0.168  |
| rs11008355            | G  | C  | 0.104    | -0.072   | 0.168   |
| rs11021221            | T  | A  | 0.064    | 0.213    | -0.143  |
| rs11030119            | G  | A  | 0.196    | 0.18     | 0.03    |
| rs111304266           | C  | G  | -0.459   | -0.37    | -0.114  |
| rs111630016           | C  | T  | 0.386    | 0.324    | 0.052   |
| rs11168244            | C  | T  | 0.318    | 0.165    | 0.147   |
| rs112204826           | C  | T  | -0.598   | -0.395   | -0.189  |
| rs11222386            | G  | C  | -0.108   | 0.051    | -0.178  |
| rs112875651           | G  | A  | 0.226    | 0.11     | 0.116   |
| rs113161639           | G  | T  | 0.451    | 0.288    | 0.16    |

|             |   |   |        |        |        |
|-------------|---|---|--------|--------|--------|
| rs114407963 | A | T | -0.087 | 0.162  | -0.234 |
| rs114534    | G | A | 0.159  | 0.001  | 0.154  |
| rs11486794  | C | T | 0.304  | 0.219  | 0.061  |
| rs1152958   | G | A | 0.145  | 0.138  | 0.014  |
| rs11556924  | C | T | 0.193  | 0.181  | 0.021  |
| rs11631778  | G | A | -0.033 | -0.141 | 0.107  |
| rs11638064  | G | A | -0.141 | 0.02   | -0.168 |
| rs11677932  | G | A | 0.103  | -0.041 | 0.151  |
| rs11690961  | A | C | 0.185  | -0.127 | 0.313  |
| rs11701033  | C | G | -0.253 | -0.083 | -0.178 |
| rs11708647  | G | A | 0.131  | -0.058 | 0.178  |
| rs117204111 | G | A | 0.428  | -0.048 | 0.491  |
| rs11993898  | T | C | -0.326 | -0.159 | -0.162 |
| rs12037669  | T | G | 0.162  | -0.062 | 0.22   |
| rs12050260  | T | C | 0.21   | 0.014  | 0.193  |
| rs12206253  | C | T | 0.168  | -0.135 | 0.287  |
| rs12208834  | A | G | -0.175 | -0.021 | -0.15  |
| rs12248718  | A | G | -0.21  | -0.054 | -0.154 |
| rs12405515  | G | T | 0.189  | 0.17   | 0.02   |
| rs12485003  | G | A | -0.169 | 0.147  | -0.327 |
| rs1250247   | C | G | 0.31   | 0.013  | 0.279  |
| rs12504699  | G | A | 0.221  | 0.109  | 0.103  |
| rs12538229  | C | T | 0.298  | 0.004  | 0.289  |
| rs12596053  | A | C | -0.275 | -0.162 | -0.111 |
| rs12606620  | G | T | 0.292  | 0.041  | 0.229  |
| rs1261744   | T | C | -0.196 | 0.077  | -0.264 |
| rs12630213  | C | T | 0.276  | 0.153  | 0.107  |
| rs12636552  | A | G | 0.241  | 0.087  | 0.144  |
| rs12670854  | A | G | 0.36   | 0.171  | 0.18   |
| rs12906962  | T | C | -0.179 | -0.16  | -0.033 |
| rs12928482  | G | A | 0.196  | 0.147  | 0.046  |

|             |   |   |        |        |        |
|-------------|---|---|--------|--------|--------|
| rs13024657  | C | T | -0.296 | -0.064 | -0.216 |
| rs13050325  | A | G | -0.258 | -0.106 | -0.146 |
| rs13104866  | G | A | 0.278  | 0.123  | 0.151  |
| rs13112725  | G | C | -0.297 | -0.15  | -0.136 |
| rs13192976  | A | T | -0.291 | 0.149  | -0.43  |
| rs13205180  | C | T | -0.045 | -0.143 | 0.094  |
| rs1322639   | G | A | -0.199 | 0.117  | -0.302 |
| rs1333047   | A | T | -0.127 | 0.037  | -0.162 |
| rs13403122  | C | T | 0.25   | 0.195  | 0.043  |
| rs13420463  | A | G | 0.282  | 0.131  | 0.159  |
| rs1350100   | A | G | 0.108  | -0.057 | 0.152  |
| rs137993948 | T | G | -0.15  | 0.056  | -0.196 |
| rs139703184 | T | A | -0.275 | 0.018  | -0.271 |
| rs1449544   | A | C | 0.171  | -0.035 | 0.2    |
| rs1475130   | T | C | -0.175 | 0      | -0.168 |
| rs147696085 | G | A | 0.184  | -0.122 | 0.29   |
| rs1544935   | T | G | 0.18   | 0.176  | 0.004  |
| rs1570350   | A | G | 0.162  | -0.042 | 0.201  |
| rs1630266   | G | A | -0.333 | -0.252 | -0.118 |
| rs168643    | T | C | 0.196  | 0.139  | 0.067  |
| rs169287    | C | A | 0.007  | 0.215  | -0.19  |
| rs1694068   | T | A | -0.245 | -0.093 | -0.164 |
| rs17046596  | A | C | -0.181 | -0.151 | -0.044 |
| rs17082391  | C | G | 0.544  | 0.375  | 0.196  |
| rs17210898  | G | A | 0.556  | 0.351  | 0.203  |
| rs17286052  | A | G | 0.36   | 0.188  | 0.167  |
| rs17423264  | C | T | 0.366  | 0.184  | 0.166  |
| rs17471509  | A | G | 0.191  | 0.056  | 0.143  |
| rs17617337  | C | T | 0.13   | 0.172  | -0.046 |
| rs1761870   | G | A | 0.119  | 0.175  | -0.049 |
| rs17831815  | T | C | 0.203  | 0.032  | 0.176  |

|           |   |   |        |        |        |
|-----------|---|---|--------|--------|--------|
| rs1848797 | A | G | 0.265  | 0.191  | 0.065  |
| rs1876487 | A | C | -0.205 | -0.162 | -0.05  |
| rs1923409 | G | A | -0.137 | 0.024  | -0.164 |
| rs1938598 | T | C | 0.33   | 0.127  | 0.21   |
| rs1966203 | C | G | -0.105 | 0.035  | -0.143 |
| rs200541  | A | G | -0.281 | -0.095 | -0.175 |
| rs2012714 | C | T | -0.222 | -0.038 | -0.182 |
| rs2034618 | C | T | 0.137  | 0.188  | -0.052 |
| rs2049814 | A | G | -0.152 | 0.001  | -0.153 |
| rs2050663 | T | C | -0.229 | -0.174 | -0.062 |
| rs210156  | A | G | -0.149 | -0.148 | -0.001 |
| rs2178452 | G | A | 0.259  | 0.133  | 0.137  |
| rs2193635 | C | T | -0.274 | 0.073  | -0.324 |
| rs2215590 | C | T | -0.079 | 0.09   | -0.161 |
| rs2236973 | T | C | -0.255 | -0.182 | -0.088 |
| rs2244643 | A | C | -0.146 | 0.073  | -0.219 |
| rs2246438 | G | A | 0.139  | 0.16   | -0.018 |
| rs2280861 | A | G | -0.175 | -0.173 | -0.01  |
| rs2289125 | A | C | -0.274 | 0.091  | -0.347 |
| rs2360970 | G | C | -0.215 | -0.124 | -0.103 |
| rs2393455 | C | A | -0.171 | -0.02  | -0.153 |
| rs2404715 | C | T | 0.4    | 0.066  | 0.338  |
| rs2424908 | C | T | -0.196 | -0.009 | -0.189 |
| rs2440907 | G | T | -0.199 | -0.061 | -0.14  |
| rs2498323 | G | A | -0.292 | 0.021  | -0.29  |
| rs2540950 | C | T | 0.193  | 0.017  | 0.172  |
| rs258494  | C | G | 0.141  | 0.216  | -0.06  |
| rs2585810 | G | A | -0.22  | -0.117 | -0.112 |
| rs2645466 | A | C | -0.173 | -0.029 | -0.152 |
| rs2706110 | T | C | 0.122  | -0.051 | 0.182  |
| rs273957  | C | T | -0.145 | 0.003  | -0.147 |

|            |   |   |        |        |        |
|------------|---|---|--------|--------|--------|
| rs2759308  | G | A | -0.276 | -0.136 | -0.145 |
| rs2761436  | C | T | -0.2   | -0.03  | -0.154 |
| rs28594215 | G | A | -0.133 | 0.014  | -0.144 |
| rs28663144 | A | C | -0.694 | -0.322 | -0.366 |
| rs2899463  | T | C | 0.189  | 0.027  | 0.153  |
| rs2971669  | C | T | -0.159 | 0.015  | -0.169 |
| rs3011549  | A | C | 0.326  | 0.137  | 0.174  |
| rs303343   | C | T | -0.229 | -0.095 | -0.122 |
| rs34331990 | T | G | -0.096 | -0.154 | 0.036  |
| rs34457140 | T | G | -0.183 | -0.015 | -0.163 |
| rs34489224 | C | G | 0.108  | -0.092 | 0.185  |
| rs34594435 | C | T | 0.187  | 0.183  | 0.008  |
| rs34872471 | T | C | -0.25  | -0.043 | -0.204 |
| rs35261357 | C | T | -0.265 | -0.051 | -0.216 |
| rs35410524 | C | T | -0.305 | -0.121 | -0.166 |
| rs35565381 | T | C | -0.157 | -0.14  | -0.02  |
| rs35654783 | T | C | 0.185  | 0.166  | 0.02   |
| rs36010659 | T | C | 0.281  | 0.042  | 0.254  |
| rs360158   | G | A | -0.301 | -0.165 | -0.13  |
| rs36061333 | C | G | 0.107  | 0.16   | -0.047 |
| rs36226649 | T | C | -0.156 | -0.297 | 0.149  |
| rs3731818  | G | A | 0.24   | 0.117  | 0.127  |
| rs3749237  | G | A | -0.208 | -0.165 | -0.041 |
| rs3790227  | C | A | -0.127 | 0.11   | -0.22  |
| rs3820068  | A | G | 0.255  | 0.066  | 0.199  |
| rs3915499  | G | A | 0.169  | 0.02   | 0.152  |
| rs3923097  | T | A | 0.345  | 0.273  | 0.086  |
| rs4110517  | A | G | -0.282 | -0.135 | -0.148 |
| rs4141663  | C | T | 0.258  | 0.126  | 0.125  |
| rs4292285  | T | A | 0.23   | 0.154  | 0.072  |
| rs4295     | C | G | 0.24   | 0.14   | 0.097  |

|            |   |   |        |        |        |
|------------|---|---|--------|--------|--------|
| rs4475250  | G | A | 0.243  | 0.136  | 0.097  |
| rs4551692  | G | A | -0.419 | -0.255 | -0.177 |
| rs460105   | T | C | 0.175  | 0.178  | -0.008 |
| rs4653889  | A | G | 0.205  | 0.152  | 0.057  |
| rs4686683  | T | G | -0.183 | -0.172 | -0.019 |
| rs4709746  | C | T | 0.249  | 0.19   | 0.051  |
| rs4712656  | G | C | -0.227 | -0.124 | -0.094 |
| rs4788913  | G | A | -0.283 | -0.122 | -0.154 |
| rs4803457  | T | C | 0.081  | -0.075 | 0.149  |
| rs4808569  | C | A | 0.235  | 0.162  | 0.074  |
| rs4923910  | G | C | -0.141 | -0.178 | 0.046  |
| rs4972805  | C | T | 0.184  | 0.143  | 0.038  |
| rs4980877  | C | T | -0.165 | -0.014 | -0.162 |
| rs4984497  | T | C | 0.098  | 0.148  | -0.046 |
| rs507666   | G | A | 0.025  | 0.169  | -0.145 |
| rs55940751 | C | T | 0.216  | 0.087  | 0.129  |
| rs57400569 | G | A | 0.244  | 0.049  | 0.204  |
| rs58117425 | G | A | -0.137 | -0.192 | 0.036  |
| rs6019378  | C | T | 0.156  | 0.156  | -0.003 |
| rs60199046 | A | G | 0.24   | -0.083 | 0.313  |
| rs6031435  | A | G | -0.214 | -0.052 | -0.17  |
| rs6060114  | T | C | 0.259  | 0.237  | 0.009  |
| rs6090040  | A | C | 0.265  | 0.1    | 0.15   |
| rs6129880  | T | G | 0.264  | 0.174  | 0.086  |
| rs61448762 | G | A | 0.358  | 0.172  | 0.172  |
| rs61735998 | G | T | -0.589 | -0.035 | -0.519 |
| rs61823001 | A | G | 0.099  | -0.215 | 0.312  |
| rs61879810 | A | G | 0.285  | 0.198  | 0.079  |
| rs62011052 | T | C | -0.207 | 0.105  | -0.28  |
| rs62162674 | G | C | 0.14   | -0.042 | 0.181  |
| rs62270945 | C | T | -0.608 | -0.041 | -0.534 |



|            |   |   |        |        |        |
|------------|---|---|--------|--------|--------|
| rs62361303 | C | T | 0.262  | 0.015  | 0.235  |
| rs62524579 | G | A | 0.244  | 0.147  | 0.1    |
| rs6428947  | C | G | 0.253  | 0.205  | 0.047  |
| rs6429422  | T | G | -0.158 | -0.249 | 0.075  |
| rs6434404  | A | G | 0.311  | 0.125  | 0.185  |
| rs6479908  | C | G | -0.092 | -0.142 | 0.041  |
| rs649472   | T | C | 0.165  | 0.01   | 0.161  |
| rs6595838  | G | A | -0.267 | -0.133 | -0.136 |
| rs66887589 | T | C | -0.214 | -0.206 | -0.026 |
| rs670463   | A | G | -0.187 | -0.023 | -0.158 |
| rs6747874  | G | A | -0.163 | 0.003  | -0.171 |
| rs6782694  | C | A | -0.178 | 0.024  | -0.19  |
| rs6793656  | A | G | -0.197 | 0.032  | -0.224 |
| rs6795735  | C | T | 0.169  | 0.159  | 0.019  |
| rs6803322  | C | A | 0.228  | 0.102  | 0.13   |
| rs685149   | A | G | -0.311 | -0.098 | -0.186 |
| rs6957161  | A | G | 0.256  | 0.157  | 0.103  |
| rs7008914  | T | C | 0.238  | 0.104  | 0.127  |
| rs7019055  | A | G | 0.18   | 0.031  | 0.15   |
| rs7041664  | C | A | -0.247 | -0.083 | -0.166 |
| rs7107356  | A | G | -0.309 | -0.149 | -0.159 |
| rs7116797  | A | G | 0.311  | 0.214  | 0.11   |
| rs7161323  | C | T | -0.275 | -0.147 | -0.132 |
| rs7225219  | T | A | -0.248 | -0.094 | -0.137 |
| rs7255     | T | C | -0.164 | 0.036  | -0.205 |
| rs72799341 | G | A | -0.031 | -0.161 | 0.132  |
| rs72812846 | T | A | 0.198  | 0.202  | -0.008 |
| rs72930293 | C | T | 0.257  | 0.234  | 0.03   |
| rs72958213 | C | T | 0.101  | -0.097 | 0.177  |
| rs7312132  | G | C | 0.354  | 0.077  | 0.283  |
| rs73605614 | A | C | -0.175 | 0.016  | -0.177 |

|            |   |   |        |        |        |
|------------|---|---|--------|--------|--------|
| rs74237369 | G | T | 0.315  | 0.162  | 0.144  |
| rs74482535 | C | T | 0.27   | -0.005 | 0.271  |
| rs74621754 | G | A | 0.132  | -0.229 | 0.36   |
| rs7500448  | A | G | 0.192  | -0.135 | 0.301  |
| rs7546498  | G | T | 0.257  | 0.147  | 0.095  |
| rs7575523  | T | G | 0.154  | 0.011  | 0.142  |
| rs7586597  | G | T | -0.072 | 0.088  | -0.154 |
| rs7590201  | G | T | -0.216 | -0.138 | -0.082 |
| rs7591091  | T | C | 0.079  | 0.131  | -0.055 |
| rs7605066  | C | T | 0.156  | 0.004  | 0.149  |
| rs76398786 | C | T | -0.437 | -0.382 | -0.057 |
| rs76627715 | T | C | 0.14   | 0.216  | -0.062 |
| rs7665304  | A | C | 0.22   | 0.128  | 0.079  |
| rs7666150  | T | C | 0.206  | 0.05   | 0.15   |
| rs76735299 | G | A | -0.429 | -0.249 | -0.204 |
| rs76785029 | C | T | 0.324  | -0.072 | 0.379  |
| rs7714219  | G | C | -0.143 | 0.018  | -0.164 |
| rs7734334  | C | A | -0.162 | -0.154 | -0.009 |
| rs783621   | A | G | 0.289  | 0.082  | 0.207  |
| rs78378222 | T | G | 0.336  | -0.638 | 0.875  |
| rs7838781  | A | G | 0.227  | 0.048  | 0.183  |
| rs7856420  | G | C | 0.13   | -0.035 | 0.159  |
| rs786919   | A | G | 0.262  | 0.109  | 0.156  |
| rs7914287  | T | C | -0.202 | -0.035 | -0.187 |
| rs7927515  | C | A | -0.235 | -0.084 | -0.149 |
| rs7928655  | C | G | -0.158 | -0.143 | -0.014 |
| rs7951348  | C | T | -0.252 | -0.12  | -0.122 |
| rs7977389  | T | C | 0.381  | 0.104  | 0.274  |
| rs7980687  | G | A | 0.118  | 0.196  | -0.061 |
| rs80073370 | A | T | 0.404  | 0.163  | 0.219  |
| rs8073626  | C | T | 0.217  | 0.092  | 0.122  |

|           |   |   |        |        |        |
|-----------|---|---|--------|--------|--------|
| rs8103992 | A | C | 0.137  | -0.055 | 0.198  |
| rs8105753 | A | C | 0.249  | 0.137  | 0.107  |
| rs813412  | C | T | 0.202  | 0.029  | 0.178  |
| rs8139817 | A | C | -0.155 | -0.143 | -0.012 |
| rs869396  | C | A | 0.166  | -0.05  | 0.222  |
| rs8904    | G | A | -0.259 | -0.082 | -0.167 |
| rs893929  | G | A | 0.233  | 0.124  | 0.113  |
| rs903432  | A | G | 0.387  | 0.313  | 0.073  |
| rs917275  | A | G | -0.162 | 0.013  | -0.182 |
| rs9303241 | T | A | 0.204  | 0.047  | 0.159  |
| rs9314907 | C | T | -0.292 | -0.122 | -0.16  |
| rs9337951 | G | A | -0.156 | 0.109  | -0.265 |
| rs9349379 | A | G | 0.187  | -0.018 | 0.195  |
| rs937213  | T | C | 0.256  | 0.131  | 0.122  |
| rs956006  | C | T | 0.158  | -0.06  | 0.215  |
| rs9565436 | A | C | -0.303 | -0.1   | -0.196 |
| rs9662255 | C | A | 0.2    | 0.013  | 0.177  |
| rs9708177 | C | T | -0.276 | 0.018  | -0.274 |
| rs9729719 | G | A | -0.13  | 0.053  | -0.188 |
| rs9844972 | G | C | -0.441 | -0.148 | -0.296 |
| rs9845655 | T | C | 0.215  | 0.161  | 0.042  |
| rs9864898 | C | T | -0.271 | -0.19  | -0.093 |
| rs9882772 | T | C | -0.154 | -0.133 | -0.018 |
| rs9935770 | C | T | 0.223  | 0.111  | 0.11   |

**Supplementary Table 3 – Pathway Analysis Results From Multi-trait analysis with FDR<0.5**

| <b>FULL_NAME</b>                                                                           | <b>NGENES</b> | <b>BETA</b> | <b>BETA STD</b> | <b>SE</b> | <b>P</b> | <b>fdr</b> |
|--------------------------------------------------------------------------------------------|---------------|-------------|-----------------|-----------|----------|------------|
| GO_PHOSPHATIDYLINOSITOL_5_PHOSPHATE_BINDING                                                | 13            | 1.18        | 0.0322          | 0.258     | 2.24E-06 | 0.020      |
| GO_EXTRACELLULAR_MATRIX_STRUCTURAL_CONSTITUENT                                             | 149           | 0.316       | 0.029           | 0.0724    | 6.19E-06 | 0.027      |
| GO_EXTRACELLULAR_MATRIX_CONSTITUENT_CONFERRING_ELASTICITY                                  | 9             | 1.18        | 0.0268          | 0.276     | 8.91E-06 | 0.027      |
| GO_MIDDLE_EAR_MORPHOGENESIS                                                                | 18            | 0.835       | 0.0267          | 0.205     | 2.27E-05 | 0.049      |
| GO_ROUNDABOUT_BINDING                                                                      | 5             | 1.71        | 0.0288          | 0.423     | 2.72E-05 | 0.049      |
| GO_COLLAGEN_TYPE_IV_TRIMER                                                                 | 4             | 1.98        | 0.0298          | 0.508     | 5.01E-05 | 0.075      |
| GO_STRUCTURAL_MOLECULE_ACTIVITY_CONFERRING_ELASTICITY                                      | 11            | 0.933       | 0.0233          | 0.256     | 1.34E-04 | 0.173      |
| GO_VOLTAGE_GATED_CALCIUM_CHANNEL_ACTIVITY_INVOLVED_IN_CARDIAC_MUSCLE_CELL_ACTION_POTENTIAL | 5             | 1.55        | 0.0262          | 0.434     | 1.72E-04 | 0.194      |
| GO_REGULATION_OF_VOLTAGE_GATED_CALCIUM_CHANNEL_ACTIVITY                                    | 32            | 0.499       | 0.0213          | 0.144     | 2.69E-04 | 0.245      |
| GO_EXTRACELLULAR_MATRIX_COMPONENT                                                          | 45            | 0.46        | 0.0232          | 0.135     | 3.19E-04 | 0.245      |
| GO_PHOSPHATIDYLINOSITOL_3_PHOSPHATE_BINDING                                                | 34            | 0.491       | 0.0216          | 0.144     | 3.21E-04 | 0.245      |
| GO_POSITIVE_REGULATION_OF_CGMP_MEDIATED_SIGNALING                                          | 8             | 0.854       | 0.0182          | 0.252     | 3.49E-04 | 0.245      |
| GO_ELASTIC_FIBER_ASSEMBLY                                                                  | 7             | 0.857       | 0.0171          | 0.254     | 3.80E-04 | 0.245      |
| GO_REGULATION_OF_HIGH_VOLTAGE_GATED_CALCIUM_CHANNEL_ACTIVITY                               | 16            | 0.68        | 0.0205          | 0.203     | 4.04E-04 | 0.245      |
| GO_NEGATIVE_REGULATION_OF_RUFFLE_ASSEMBLY                                                  | 5             | 1.34        | 0.0226          | 0.401     | 4.14E-04 | 0.245      |
| GO_90S_PRERIBOSOME                                                                         | 28            | 0.416       | 0.0166          | 0.125     | 4.34E-04 | 0.245      |
| GO_REGULATION_OF_CGMP_MEDIATED_SIGNALING                                                   | 15            | 0.661       | 0.0193          | 0.201     | 0.001    | 0.260      |
| GO_MATURATION_OF_SSU_RRNA_FROM_TRICISTRONIC_RRNA_TRANSCRIPT_SSU_RRNA_5_8S_RRNA_LSU_RRNA    | 33            | 0.422       | 0.0183          | 0.129     | 0.001    | 0.260      |
| GO_MEMBRANE_DEPOLARIZATION_DURING_AV_NODE_CELL_ACTION_POTENTIAL                            | 5             | 1.37        | 0.0231          | 0.43      | 0.001    | 0.342      |
| GO_CALCIUM_ION_TRANSMEMBRANE_TRANSPORT_VIA_HIGH_VOLTAGE_GATED_CALCIUM_CHANNEL              | 12            | 0.815       | 0.0213          | 0.257     | 0.001    | 0.342      |
| GO_HIGH_VOLTAGE_GATED_CALCIUM_CHANNEL_ACTIVITY                                             | 8             | 0.976       | 0.0208          | 0.315     | 0.001    | 0.409      |
| GO_REGULATION_OF_CHOLESTEROL_ESTERIFICATION                                                | 11            | 0.785       | 0.0196          | 0.255     | 0.001    | 0.409      |
| GO_BASEMENT_MEMBRANE                                                                       | 85            | 0.302       | 0.0209          | 0.0981    | 0.001    | 0.409      |
| GO_CGMP_MEDIATED_SIGNALING                                                                 | 31            | 0.46        | 0.0193          | 0.15      | 0.001    | 0.409      |
| GO_POSITIVE_REGULATION_OF_LONG_TERM_NEURONAL_SYNAPTIC_PLASTICITY                           | 5             | 1.31        | 0.0221          | 0.432     | 0.001    | 0.425      |
| GO_NEGATIVE_REGULATION_OF_MACROPHAGE_CHEMOTAXIS                                            | 7             | 0.902       | 0.018           | 0.3       | 0.001    | 0.430      |
| GO_ASCENDING_AORTA_DEVELOPMENT                                                             | 4             | 1.11        | 0.0167          | 0.368     | 0.001    | 0.430      |
| GO_NEGATIVE_REGULATION_OF_DNA_DAMAGE_CHECKPOINT                                            | 5             | 1.35        | 0.0228          | 0.451     | 0.001    | 0.430      |

|                                                                                                 |     |       |        |        |       |       |
|-------------------------------------------------------------------------------------------------|-----|-------|--------|--------|-------|-------|
| GO_POSITIVE_REGULATION_OF_MAST_CELL_ACTIVATION                                                  | 17  | 0.664 | 0.0206 | 0.223  | 0.001 | 0.435 |
| GO_CHORIONIC_TROPHOBLAST_CELL_DIFFERENTIATION                                                   | 5   | 1.26  | 0.0212 | 0.424  | 0.001 | 0.435 |
| GO_ANCHORED_COMPONENT_OF_POSTSYNAPTIC_MEMBRANE                                                  | 5   | 1.3   | 0.022  | 0.439  | 0.001 | 0.435 |
| GO_NEGATIVE_REGULATION_OF_SYSTEMIC_ARTERIAL_BLOOD_PRESSURE                                      | 17  | 0.633 | 0.0197 | 0.215  | 0.002 | 0.458 |
| GO_POSITIVE_REGULATION_OF_EPIDERMAL_GROWTH_FACTOR_ACTIVATED_RECEPTOR_ACTIVITY                   | 9   | 0.84  | 0.019  | 0.288  | 0.002 | 0.483 |
| GO_CLATHRIN_COATED_VESICLE_MEMBRANE                                                             | 101 | 0.238 | 0.018  | 0.082  | 0.002 | 0.483 |
| GO_CALMODULIN_DEPENDENT_PROTEIN_PHOSPHATASE_ACTIVITY                                            | 5   | 1.3   | 0.022  | 0.45   | 0.002 | 0.483 |
| GO_PRERIBOSOME                                                                                  | 68  | 0.243 | 0.0151 | 0.0845 | 0.002 | 0.498 |
| GO_EXTRACELLULAR_MATRIX_ASSEMBLY                                                                | 22  | 0.481 | 0.017  | 0.169  | 0.002 | 0.499 |
| GO_SUPEROXIDE_GENERATING_NADPH_OXIDASE_ACTIVATOR_ACTIVITY                                       | 6   | 1.1   | 0.0203 | 0.387  | 0.002 | 0.499 |
| GO_MODULATION_OF_AGE_RELATED_BEHAVIORAL_DECLINE                                                 | 7   | 0.826 | 0.0165 | 0.291  | 0.002 | 0.499 |
| GO_PEBOW_COMPLEX                                                                                | 5   | 0.864 | 0.0146 | 0.306  | 0.002 | 0.499 |
| GO_POSITIVE_REGULATION_OF_HIGH_VOLTAGE_GATED_CALCIUM_CHANNEL_ACTIVITY                           | 5   | 0.922 | 0.0155 | 0.327  | 0.002 | 0.499 |
| GO_POSITIVE_REGULATION_OF_SYNAPSE_MATURATION                                                    | 8   | 0.85  | 0.0181 | 0.302  | 0.002 | 0.499 |
| GO_POSITIVE_REGULATION_OF_MAPKKK_CASCADE_BY_FIBROBLAST_GROWTH_FACTOR_RECEPTOR_SIGNALING_PATHWAY | 5   | 1.01  | 0.017  | 0.359  | 0.002 | 0.499 |
| GO_RNA_CAP_BINDING                                                                              | 18  | 0.491 | 0.0157 | 0.175  | 0.003 | 0.499 |
| GO_CALCIUM_DEPENDENT_PROTEIN_SERINE_THREONINE_PHOSPHATASE_ACTIVITY                              | 7   | 0.868 | 0.0173 | 0.311  | 0.003 | 0.499 |
| GO_RESPONSE_TO_CORTISOL                                                                         | 5   | 1.31  | 0.0221 | 0.471  | 0.003 | 0.499 |
| GO_K63_LINKED_POLYUBIQUITIN_MODIFICATION_DEPENDENT_PROTEIN_BINDING                              | 20  | 0.475 | 0.016  | 0.171  | 0.003 | 0.499 |
| GO_PHAGOPHORE_ASSEMBLY_SITE                                                                     | 31  | 0.412 | 0.0173 | 0.148  | 0.003 | 0.499 |
| GO_POSITIVE_REGULATION_OF_CATION_CHANNEL_ACTIVITY                                               | 61  | 0.302 | 0.0177 | 0.109  | 0.003 | 0.499 |
| GO_ROUNDABOUT_SIGNALING_PATHWAY                                                                 | 7   | 1.06  | 0.021  | 0.381  | 0.003 | 0.499 |
| GO_POSITIVE_REGULATION_OF_T_CELL_RECEPTOR_SIGNALING_PATHWAY                                     | 13  | 0.582 | 0.0158 | 0.211  | 0.003 | 0.499 |
| GO_NEGATIVE_REGULATION_OF_CIRCADIAN_SLEEP_WAKE_CYCLE_SLEEP                                      | 5   | 0.934 | 0.0157 | 0.338  | 0.003 | 0.499 |
| GO_MODIFICATION_OF_POSTSYNAPTIC_ACTIN_CYTOSKELETON                                              | 10  | 0.749 | 0.0178 | 0.272  | 0.003 | 0.499 |
| GO_NEUROLOGICAL_SYSTEM_PROCESS_INVOLVED_IN_REGULATION_OF_SYSTEMIC_ARTERIAL_BLOOD_PRESSURE       | 8   | 0.855 | 0.0182 | 0.311  | 0.003 | 0.499 |
| GO_NEGATIVE_REGULATION_OF_SODIUM_ION_TRANSMEMBRANE_TRANSPORT                                    | 13  | 0.709 | 0.0192 | 0.258  | 0.003 | 0.499 |

**Supplementary Table 4 - Associations of Genome-wide Significant SNPs identified in MEGASTROKE with Lacunar Stroke (Europeans) in this analysis**

| SNP        | CHR | BP        | RA | OA | RAF    | beta     | SE     | pval      | TotalSampleSize | TotalCases |
|------------|-----|-----------|----|----|--------|----------|--------|-----------|-----------------|------------|
| rs12037987 | 1   | 113042822 | t  | c  | 0.918  | 0.0423   | 0.0404 | 0.2946    | 248766          | 5470       |
| rs12124533 | 1   | 115657799 | t  | c  | 0.2453 | -0.0163  | 0.0246 | 0.5074    | 249205          | 5502       |
| rs880315   | 1   | 10796866  | t  | c  | 0.652  | 0.0851   | 0.0218 | 9.27E-05  | 250023          | 5706       |
| rs13143308 | 4   | 111714419 | t  | g  | 0.2092 | 0.0315   | 0.0251 | 0.2092    | 254952          | 6038       |
| rs17612742 | 4   | 148414651 | t  | c  | 0.8649 | 0.0312   | 0.0306 | 0.308     | 249205          | 5502       |
| rs6825454  | 4   | 155501188 | t  | c  | 0.7419 | 0.0251   | 0.0242 | 0.2981    | 249205          | 5502       |
| rs11957829 | 5   | 121515195 | a  | g  | 0.8319 | -0.129   | 0.0338 | 0.0001369 | 240101          | 4433       |
| rs6891174  | 5   | 172640590 | a  | g  | 0.3664 | 0.017    | 0.0224 | 0.4472    | 249205          | 5502       |
| rs16896398 | 6   | 43262704  | a  | t  | 0.7041 | 0.0194   | 0.0232 | 0.4028    | 249205          | 5502       |
| rs4959130  | 6   | 1356916   | a  | g  | 0.1423 | -0.1339  | 0.0291 | 4.23E-06  | 254132          | 5834       |
| rs2107595  | 7   | 19049388  | a  | g  | 0.164  | -0.0214  | 0.0283 | 0.4491    | 250021          | 5706       |
| rs42039    | 7   | 92244422  | t  | c  | 0.2458 | 0.0393   | 0.0238 | 0.09818   | 254952          | 6038       |
| rs10820405 | 9   | 106010237 | a  | g  | 0.1898 | -0.0149  | 0.0264 | 0.5729    | 250023          | 5706       |
| rs635634   | 9   | 136155000 | t  | c  | 0.1903 | -0.0081  | 0.0264 | 0.7608    | 253764          | 5840       |
| rs7859727  | 9   | 22102165  | t  | c  | 0.4858 | -0.0582  | 0.0203 | 0.004088  | 254950          | 6038       |
| rs2295786  | 10  | 105616482 | a  | t  | 0.6518 | -0.0455  | 0.0223 | 0.04108   | 249205          | 5502       |
| rs3184504  | 12  | 111884608 | t  | c  | 0.4678 | -0.0958  | 0.0228 | 2.67E-05  | 245847          | 4969       |
| rs35436    | 12  | 115554523 | t  | c  | 0.3874 | 0.0543   | 0.0219 | 0.01319   | 249205          | 5502       |
| rs7304841  | 12  | 20577593  | a  | c  | 0.5984 | -0.024   | 0.0222 | 0.2801    | 249205          | 5502       |
| rs9526212  | 13  | 47225745  | a  | g  | 0.2393 | 0.0488   | 0.0238 | 0.04003   | 254952          | 6038       |
| rs4932370  | 15  | 91404705  | a  | g  | 0.3382 | -0.0165  | 0.0227 | 0.4676    | 253771          | 5671       |
| rs12445022 | 16  | 87575332  | a  | g  | 0.3376 | -0.1212  | 0.0217 | 2.48E-08  | 250025          | 5706       |
| rs12932445 | 16  | 73069888  | t  | c  | 0.823  | 0.0023   | 0.0273 | 0.9315    | 254132          | 5834       |
| rs11867415 | 17  | 1571818   | a  | g  | 0.9439 | 0.1125   | 0.0496 | 0.02327   | 231099          | 4745       |
| rs2229383  | 19  | 10794630  | t  | g  | 0.6454 | -0.0307  | 0.0212 | 0.1487    | 254946          | 6038       |
| rs8103309  | 19  | 11174935  | t  | c  | 0.6471 | 2.00E-04 | 0.0211 | 0.9907    | 254945          | 6038       |

CHR, chromosome; BP, base position; RA, reference allele; OA, other allele; RAF, reference allele frequency; SE, standard error.

**Supplementary Table 5 - Associations of Genome-wide Significant SNPs identified in MEGASTROKE with Lacunar Stroke (Transethnic) in this analysis**

| SNP        | CHR | BP        | RA | OA | RAF    | beta    | SE     | pval      | TotalSampleSize | TotalCases |
|------------|-----|-----------|----|----|--------|---------|--------|-----------|-----------------|------------|
| rs12037987 | 1   | 113042822 | t  | c  | 0.9205 | 0.0541  | 0.0392 | 0.1678    | 252954          | 6223       |
| rs12124533 | 1   | 115657799 | t  | c  | 0.2375 | -0.023  | 0.024  | 0.3379    | 253147          | 6200       |
| rs880315   | 1   | 10796866  | t  | c  | 0.6631 | 0.0739  | 0.0211 | 0.0004462 | 253965          | 6404       |
| rs13143308 | 4   | 111714419 | t  | g  | 0.2214 | 0.0344  | 0.0235 | 0.1421    | 259137          | 6791       |
| rs17612742 | 4   | 148414651 | t  | c  | 0.8601 | 0.024   | 0.0287 | 0.4039    | 253147          | 6200       |
| rs6825454  | 4   | 155501188 | t  | c  | 0.7442 | 0.0269  | 0.023  | 0.242     | 253147          | 6200       |
| rs11957829 | 5   | 121515195 | a  | g  | 0.8215 | -0.1125 | 0.0309 | 0.0002704 | 244281          | 5186       |
| rs6891174  | 5   | 172640590 | a  | g  | 0.3563 | 0.0159  | 0.022  | 0.4701    | 253147          | 6200       |
| rs16896398 | 6   | 43262704  | a  | t  | 0.6655 | 0.0206  | 0.022  | 0.3484    | 253393          | 6255       |
| rs4959130  | 6   | 1356916   | a  | g  | 0.14   | -0.1367 | 0.0288 | 2.13E-06  | 258317          | 6587       |
| rs2107595  | 7   | 19049388  | a  | g  | 0.1696 | -0.0178 | 0.0265 | 0.5028    | 253963          | 6404       |
| rs42039    | 7   | 92244422  | t  | c  | 0.2388 | 0.0389  | 0.0232 | 0.09409   | 259139          | 6791       |
| rs10820405 | 9   | 106010237 | a  | g  | 0.1847 | -0.0171 | 0.0258 | 0.5076    | 254208          | 6459       |
| rs635634   | 9   | 136155000 | t  | c  | 0.1848 | -0.0063 | 0.0256 | 0.8045    | 257952          | 6593       |
| rs7859727  | 9   | 22102165  | t  | c  | 0.5049 | -0.0585 | 0.0195 | 0.00273   | 259133          | 6791       |
| rs2295786  | 10  | 105616482 | a  | t  | 0.663  | -0.0462 | 0.0216 | 0.03241   | 253392          | 6255       |
| rs3184504  | 12  | 111884608 | t  | c  | 0.4555 | -0.1015 | 0.0224 | 6.07E-06  | 250035          | 5722       |
| rs35436    | 12  | 115554523 | t  | c  | 0.3962 | 0.0572  | 0.0207 | 0.005719  | 253392          | 6255       |
| rs7304841  | 12  | 20577593  | a  | c  | 0.5914 | -0.0286 | 0.0209 | 0.1723    | 253147          | 6200       |
| rs9526212  | 13  | 47225745  | a  | g  | 0.2532 | 0.0426  | 0.0223 | 0.05629   | 259137          | 6791       |
| rs4932370  | 15  | 91404705  | a  | g  | 0.3621 | -0.0267 | 0.0214 | 0.2118    | 257959          | 6424       |
| rs12445022 | 16  | 87575332  | a  | g  | 0.3262 | -0.1139 | 0.0211 | 6.62E-08  | 253967          | 6404       |
| rs12932445 | 16  | 73069888  | t  | c  | 0.8257 | 0.0097  | 0.0259 | 0.7081    | 258074          | 6532       |
| rs11867415 | 17  | 1571818   | a  | g  | 0.7676 | 0.1117  | 0.0392 | 0.004391  | 235286          | 5498       |
| rs2229383  | 19  | 10794630  | t  | g  | 0.6481 | -0.0256 | 0.0202 | 0.2066    | 259134          | 6791       |
| rs8103309  | 19  | 11174935  | t  | c  | 0.6247 | -0.0162 | 0.02   | 0.418     | 259126          | 6791       |

CHR, chromosome; BP, base position; RA, reference allele; OA, other allele; RAF, reference allele frequency; SE, standard error.

**Supplementary Table 6 - Association Results for 12 SNPs associated with Lacunar Stroke in this analysis in MEGASTROKE All Stroke (European) Analysis**

| SNP        | CHR | BP        | RA | OA | RAF    | Beta    | SE     | P         | TotalSampleSize | TotalCases |
|------------|-----|-----------|----|----|--------|---------|--------|-----------|-----------------|------------|
| rs2984613  | 1   | 156197380 | t  | c  | 0.3579 | -0.0641 | 0.0095 | 1.72E-11  | 444629          | 40453      |
| rs72934535 | 2   | 203968973 | t  | c  | 0.8936 | 0.0502  | 0.0151 | 0.0009157 | 442265          | 40404      |
| rs4621303  | 3   | 41839370  | a  | t  | 0.1623 | -0.0486 | 0.0127 | 0.0001339 | 444629          | 40453      |
| rs2303655  | 5   | 121518378 | t  | c  | 0.8135 | 0.052   | 0.0122 | 2.01E-05  | 442142          | 39067      |
| rs7766042  | 6   | 1366718   | t  | c  | 0.8978 | -0.0847 | 0.016  | 1.24E-07  | 435591          | 39527      |
| rs225744   | 6   | 142562417 | t  | c  | 0.2374 | -0.0171 | 0.0108 | 0.1131    | 443916          | 39978      |
| rs61000833 | 10  | 105447838 | t  | c  | 0.6032 | 0.0189  | 0.0095 | 0.04757   | 444629          | 40453      |
| rs79043147 | 10  | 124233181 | t  | c  | 0.0642 | 0.078   | 0.0188 | 3.44E-05  | 429911          | 40093      |
| rs2293576  | 11  | 47434986  | a  | g  | 0.3281 | -0.0369 | 0.0097 | 0.0001362 | 443926          | 40528      |
| rs11838776 | 13  | 111040681 | a  | g  | 0.2855 | 0.0245  | 0.0102 | 0.01622   | 442255          | 39854      |
| rs12445022 | 16  | 87575332  | a  | g  | 0.3346 | 0.052   | 0.0098 | 1.03E-07  | 438714          | 39884      |
| rs9958650  | 18  | 5389832   | a  | g  | 0.8957 | -0.0441 | 0.0157 | 0.004896  | 433748          | 38659      |

CHR, chromosome; BP, base position; RA, reference allele; OA, other allele; RAF, reference allele frequency; SE, standard error.



**Supplementary Table 7 - Association Results for 12 SNPs associated with Lacunar Stroke in this analysis in MEGASTROKE All Stroke (Transethnic) Analysis**

| SNP        | CHR | BP        | RA | OA | RAF    | Beta    | SE     | P         | TotalSampleSize | TotalCases |
|------------|-----|-----------|----|----|--------|---------|--------|-----------|-----------------|------------|
| rs2984613  | 1   | 156197380 | t  | c  | 0.3531 | -0.0579 | 0.0081 | 1.12E-12  | 522198          | 67030      |
| rs72934535 | 2   | 203968973 | t  | c  | 0.8964 | 0.0496  | 0.0148 | 0.0008144 | 469963          | 48195      |
| rs4621303  | 3   | 41839370  | a  | t  | 0.2063 | -0.038  | 0.0107 | 0.0003802 | 522001          | 67030      |
| rs2303655  | 5   | 121518378 | t  | c  | 0.7641 | 0.0384  | 0.0106 | 0.0002891 | 517463          | 64414      |
| rs7766042  | 6   | 1366718   | t  | c  | 0.8971 | -0.0766 | 0.0152 | 4.57E-07  | 463918          | 48062      |
| rs225744   | 6   | 142562417 | t  | c  | 0.224  | -0.0113 | 0.0098 | 0.2509    | 521553          | 66555      |
| rs79043147 | 10  | 124233181 | t  | c  | 0.0627 | 0.0754  | 0.0185 | 4.64E-05  | 457617          | 47884      |
| rs61000833 | 10  | 105447838 | t  | c  | 0.6055 | 0.0153  | 0.0083 | 0.06535   | 521069          | 66473      |
| rs2293576  | 11  | 47434986  | a  | g  | 0.3195 | -0.0311 | 0.0086 | 0.0002859 | 521132          | 66913      |
| rs11838776 | 13  | 111040681 | a  | g  | 0.2662 | 0.0283  | 0.0092 | 0.00211   | 519755          | 66431      |
| rs12445022 | 16  | 87575332  | a  | g  | 0.3089 | 0.0574  | 0.0089 | 1.05E-10  | 516372          | 66461      |
| rs9958650  | 18  | 5389832   | a  | g  | 0.8583 | -0.0362 | 0.0128 | 0.004654  | 506396          | 63589      |

CHR, chromosome; BP, base position; RA, reference allele; OA, other allele; RAF, reference allele frequency; SE, standard error.

**Supplementary Table 8 - Association Results for 12 SNPs associated with Lacunar Stroke in this analysis in MEGASTROKE All Ischaemic Stroke (European) Analysis**

| SNP        | CHR | BP        | RA | OA | RAF    | Beta    | SE     | P         | TotalSampleSize | TotalCases |
|------------|-----|-----------|----|----|--------|---------|--------|-----------|-----------------|------------|
| rs2984613  | 1   | 156197380 | t  | c  | 0.358  | -0.0582 | 0.0103 | 1.76E-08  | 434418          | 34217      |
| rs72934535 | 2   | 203968973 | t  | c  | 0.8933 | 0.0588  | 0.0165 | 0.0003606 | 421859          | 34031      |
| rs4621303  | 3   | 41839370  | a  | t  | 0.1625 | -0.0545 | 0.0139 | 8.61E-05  | 432531          | 34171      |
| rs2303655  | 5   | 121518378 | t  | c  | 0.813  | 0.0571  | 0.0133 | 1.78E-05  | 430355          | 32792      |
| rs7766042  | 6   | 1366718   | t  | c  | 0.898  | -0.0916 | 0.0176 | 1.87E-07  | 411371          | 32971      |
| rs225744   | 6   | 142562417 | t  | c  | 0.2377 | -0.0216 | 0.0117 | 0.06619   | 424955          | 33512      |
| rs61000833 | 10  | 105447838 | t  | c  | 0.6036 | 0.0199  | 0.0103 | 0.05307   | 434418          | 34217      |
| rs79043147 | 10  | 124233181 | t  | c  | 0.064  | 0.0921  | 0.0203 | 5.63E-06  | 419706          | 33972      |
| rs2293576  | 11  | 47434986  | a  | g  | 0.3285 | -0.0387 | 0.0106 | 0.0002467 | 432060          | 34174      |
| rs11838776 | 13  | 111040681 | a  | g  | 0.2854 | 0.0212  | 0.0111 | 0.0557    | 432044          | 33618      |
| rs12445022 | 16  | 87575332  | a  | g  | 0.3347 | 0.0555  | 0.0106 | 1.81E-07  | 432044          | 33618      |
| rs9958650  | 18  | 5389832   | a  | g  | 0.8956 | -0.0376 | 0.0171 | 0.02758   | 413427          | 32408      |

CHR, chromosome; BP, base position; RA, reference allele; OA, other allele; RAF, reference allele frequency; SE, standard error.

**Supplementary Table 9 - Association Results for 12 SNPs associated with Lacunar Stroke in this analysis in MEGASTROKE All Ischaemic Stroke (Transethnic) Analysis**

| SNP        | CHR | BP        | RA | OA | RAF    | Beta    | SE     | P         | TotalSampleSize | TotalCases |
|------------|-----|-----------|----|----|--------|---------|--------|-----------|-----------------|------------|
| rs2984613  | 1   | 156197380 | t  | c  | 0.3528 | -0.0533 | 0.0086 | 6.68E-10  | 511534          | 60341      |
| rs72934535 | 2   | 203968973 | t  | c  | 0.8965 | 0.0576  | 0.0161 | 0.0003587 | 449247          | 41512      |
| rs4621303  | 3   | 41839370  | a  | t  | 0.2124 | -0.0408 | 0.0114 | 0.0003447 | 509450          | 60295      |
| rs2303655  | 5   | 121518378 | t  | c  | 0.757  | 0.0402  | 0.0113 | 0.0003664 | 505676          | 58139      |
| rs7766042  | 6   | 1366718   | t  | c  | 0.8971 | -0.0807 | 0.0165 | 1.06E-06  | 439388          | 41196      |
| rs225744   | 6   | 142562417 | t  | c  | 0.2224 | -0.0127 | 0.0105 | 0.2255    | 502139          | 59636      |
| rs61000833 | 10  | 105447838 | t  | c  | 0.6059 | 0.0159  | 0.0088 | 0.07045   | 509301          | 59372      |
| rs79043147 | 10  | 124233181 | t  | c  | 0.0623 | 0.0892  | 0.0199 | 7.64E-06  | 447102          | 41453      |
| rs2293576  | 11  | 47434986  | a  | g  | 0.3183 | -0.0318 | 0.0092 | 0.0005283 | 508813          | 60106      |
| rs11838776 | 13  | 111040681 | a  | g  | 0.2634 | 0.0258  | 0.0099 | 0.008765  | 509091          | 59742      |
| rs12445022 | 16  | 87575332  | a  | g  | 0.3057 | 0.0609  | 0.0095 | 1.28E-10  | 509249          | 59742      |
| rs9958650  | 18  | 5389832   | a  | g  | 0.8539 | -0.0312 | 0.0135 | 0.0209    | 486075          | 57338      |

CHR, chromosome; BP, base position; RA, reference allele; OA, other allele; RAF, reference allele frequency; SE, standard error.

**Supplementary Table 10 – Association Results for 12 SNPs associated with Lacunar Stroke in this analysis in MEGASTROKE Small Vessel Stroke (European) Analysis**

| <b>SNP</b> | <b>CHR</b> | <b>BP</b> | <b>Ra</b> | <b>OA</b> | <b>RAF</b> | <b>Beta</b> | <b>SE</b> | <b>P</b>  | <b>TotalSampleSize</b> | <b>TotalCases</b> |
|------------|------------|-----------|-----------|-----------|------------|-------------|-----------|-----------|------------------------|-------------------|
| rs2984613  | 1          | 156197380 | t         | c         | 0.3564     | -0.0923     | 0.0238    | 0.0001044 | 254558                 | 5386              |
| rs72934535 | 2          | 203968973 | t         | c         | 0.8916     | 0.1885      | 0.0385    | 9.97E-07  | 244659                 | 5316              |
| rs4621303  | 3          | 41839370  | a         | t         | 0.1609     | -0.1062     | 0.0323    | 0.0009933 | 254558                 | 5386              |
| rs2303655  | 5          | 121518378 | t         | c         | 0.8146     | 0.1077      | 0.0316    | 0.0006495 | 251540                 | 5006              |
| rs7766042  | 6          | 1366718   | t         | c         | 0.8984     | -0.2129     | 0.0397    | 7.97E-08  | 241890                 | 5169              |
| rs225744   | 6          | 142562417 | t         | c         | 0.2382     | -0.0823     | 0.0271    | 0.002405  | 252646                 | 5249              |
| rs61000833 | 10         | 105447838 | t         | c         | 0.6043     | 0.0794      | 0.0239    | 0.000885  | 254558                 | 5386              |
| rs79043147 | 10         | 124233181 | t         | c         | 0.0663     | 0.1471      | 0.046     | 0.001377  | 242784                 | 5254              |
| rs2293576  | 11         | 47434986  | a         | g         | 0.3275     | -0.0987     | 0.0243    | 4.98E-05  | 254558                 | 5386              |
| rs11838776 | 13         | 111040681 | a         | g         | 0.2859     | 0.115       | 0.0252    | 4.92E-06  | 252646                 | 5249              |
| rs12445022 | 16         | 87575332  | a         | g         | 0.3367     | 0.1301      | 0.0244    | 9.26E-08  | 252646                 | 5249              |
| rs9958650  | 18         | 5389832   | a         | g         | 0.8951     | -0.0913     | 0.0392    | 0.01996   | 239766                 | 4874              |

CHR, chromosome; BP, base position; RA, reference allele; OA, other allele; RAF, reference allele frequency; SE, standard error.

**Supplementary Table 11 - Association Results for 12 SNPs associated with Lacunar Stroke in this analysis in MEGASTROKE Small Vessel Stroke (Transethnic) Analysis**

| SNP        | CHR | BP        | RA | OA | RAF    | Beta    | SE     | P         | TotalSampleSize | TotalCases |
|------------|-----|-----------|----|----|--------|---------|--------|-----------|-----------------|------------|
| rs2984613  | 1   | 156197380 | t  | c  | 0.354  | -0.0819 | 0.0173 | 2.29E-06  | 298777          | 11710      |
| rs72934535 | 2   | 203968973 | t  | c  | 0.894  | 0.1751  | 0.0379 | 3.94E-06  | 248332          | 5809       |
| rs4621303  | 3   | 41839370  | a  | t  | 0.2054 | -0.0989 | 0.0232 | 1.98E-05  | 298777          | 11710      |
| rs2303655  | 5   | 121518378 | t  | c  | 0.7674 | 0.0951  | 0.0243 | 8.99E-05  | 294514          | 11110      |
| rs7766042  | 6   | 1366718   | t  | c  | 0.9    | -0.201  | 0.0381 | 1.28E-07  | 245352          | 5741       |
| rs225744   | 6   | 142562417 | t  | c  | 0.2052 | -0.054  | 0.0228 | 0.01814   | 296590          | 11529      |
| rs79043147 | 10  | 124233181 | t  | c  | 0.0663 | 0.1471  | 0.046  | 0.001385  | 242784          | 5254       |
| rs61000833 | 10  | 105447838 | t  | c  | 0.63   | 0.0467  | 0.0181 | 0.009917  | 297532          | 11490      |
| rs2293576  | 11  | 47434986  | a  | g  | 0.3074 | -0.064  | 0.0184 | 0.0004975 | 298502          | 11666      |
| rs11838776 | 13  | 111040681 | a  | g  | 0.2403 | 0.1101  | 0.0207 | 1.09E-07  | 296865          | 11573      |
| rs12445022 | 16  | 87575332  | a  | g  | 0.2764 | 0.1198  | 0.0201 | 2.55E-09  | 296590          | 11529      |
| rs9958650  | 18  | 5389832   | a  | g  | 0.8551 | -0.0705 | 0.0261 | 0.006906  | 282465          | 10934      |

CHR, chromosome; BP, base position; RA, reference allele; OA, other allele; RAF, reference allele frequency; SE, standard error.

**Supplementary Table 12 – Full Results for 12 Associated Loci, Including BMASS Results**

| Nearest Genes                    | CHR | BP          | rsid       | RA/OA | RAF  | Lacunar Stroke<br>(European: 6030<br>Cases, 249,389<br>Controls) |                       | White Matter<br>Hyperintensities<br>(N=42,310) |                       | MTAG                   | BMASS |
|----------------------------------|-----|-------------|------------|-------|------|------------------------------------------------------------------|-----------------------|------------------------------------------------|-----------------------|------------------------|-------|
|                                  |     |             |            |       |      | OR(SE)                                                           | P value               | Beta(SE)                                       | P value               | P value                | logBF |
| A.                               |     |             |            |       |      |                                                                  |                       |                                                |                       |                        |       |
| <i>ICA1L-WDR12-CARF-NBEAL1</i>   | 2   | 203,968,973 | rs72934535 | G/A   | 0.88 | 1.25(0.04)                                                       | 3.7x10 <sup>-9</sup>  | 0.070(0.01)                                    | 2.8x10 <sup>-10</sup> | 5.3x10 <sup>-16</sup>  | 13.9  |
| <i>ULK4</i>                      | 3   | 41,839,370  | rs4621303  | T/A   | 0.83 | 1.15(0.03)                                                       | 1.7x10 <sup>-7</sup>  | 0.015(0.01)                                    | 0.12                  | 2.2 x10 <sup>-7*</sup> | 4.8   |
| <i>SPI1-SLC39A13-PSMC3-RAPSN</i> | 11  | 47,434,986  | rs2293576  | G/A   | 0.67 | 1.14(0.02)                                                       | 7.2x10 <sup>-10</sup> | 0.030(0.01)                                    | 3.1x10 <sup>-5</sup>  | 6.4x10 <sup>-13</sup>  | 9.9   |
| <i>ZCCHC14</i>                   | 16  | 87,575,332  | rs12445022 | A/G   | 0.34 | 1.13(0.02)                                                       | 2.5x10 <sup>-8</sup>  | 0.019(0.01)                                    | 0.0078                | 3.1x10 <sup>-9</sup>   | 6.3   |
| <i>ZBTB14-EPB41L3</i>            | 18  | 5,389,832   | rs9958650  | G/A   | 0.10 | 1.18(0.03)                                                       | 9.9x10 <sup>-7</sup>  | -0.011(0.01)                                   | 0.33                  | 0.0005                 | 3.9   |
| B.                               |     |             |            |       |      |                                                                  |                       |                                                |                       |                        |       |
| <i>SLC25A44-PMF1-BGLAP</i>       | 1   | 156,197,380 | rs2984613  | T/C   | 0.36 | 1.10(0.02)                                                       | 2.5x10 <sup>-5</sup>  | 0.037(0.01)                                    | 2.3x10 <sup>-7</sup>  | 8.2x10 <sup>-10</sup>  | 7.7   |
| <i>LOX-ZNF474-LOC100505841</i>   | 5   | 121,518,378 | rs2303655  | T/C   | 0.81 | 1.14(0.03)                                                       | 3.6x10 <sup>-5</sup>  | 0.050(0.01)                                    | 1.4x10 <sup>-8</sup>  | 1.9x10 <sup>-10</sup>  | 8.7   |
| <i>FOXF2-FOXQ1</i>               | 6   | 1,366,718   | rs7766042  | C/T   | 0.11 | 1.17(0.03)                                                       | 3.7x10 <sup>-6</sup>  | 0.045(0.01)                                    | 7.1x10 <sup>-5</sup>  | 5.2x10 <sup>-9</sup>   | 6.3   |
| <i>VTA1-GPR126</i>               | 6   | 142,562,417 | rs225744   | C/T   | 0.77 | 1.11(0.03)                                                       | 3.5x10 <sup>-5</sup>  | 0.037(0.01)                                    | 5.8x10 <sup>-6</sup>  | 9.2x10 <sup>-9</sup>   | 6.3   |
| <i>SH3PXD2A</i>                  | 10  | 105,447,838 | rs61000833 | T/C   | 0.60 | 1.10(0.02)                                                       | 1.7x10 <sup>-5</sup>  | 0.049(0.01)                                    | 2.0x10 <sup>-12</sup> | 6.0x10 <sup>-13</sup>  | 13.5  |
| <i>HTRA1-ARMS2</i>               | 10  | 124,233,181 | rs79043147 | T/C   | 0.07 | 1.21(0.04)                                                       | 3.2x10 <sup>-6</sup>  | 0.057(0.01)                                    | 1.8x10 <sup>-5</sup>  | 1.6x10 <sup>-9</sup>   | 6.9   |
| <i>COL4A2</i>                    | 13  | 111,040,681 | rs11838776 | A/G   | 0.29 | 1.11(0.02)                                                       | 4.3x10 <sup>-6</sup>  | 0.050(0.01)                                    | 7.9x10 <sup>-11</sup> | 7.9x10 <sup>-13</sup>  | 11.6  |

A, Associations reaching genome-wide significance for Lacunar Stroke; B, Associations reaching genome-wide significance in multi-trait analysis; CHR, chromosome; BP, base position; RA, reference allele; OA, other allele; RAF, reference allele frequency; OR, odds ratio; SE, standard error. MTAG, multi-trait analysis of GWAS; BMASS, Bayesian multivariate analysis of summary statistics; logBF, log (Bayes factor); \*, As A/T and C/G SNPs are removed by MTAG, results are presented for SNP in highest LD (rs9842261).

**Supplementary Table 13 – Association Statistics for 12 Variants Associated with Lacunar Stroke from MRI Confirmed and Standard Phenotyping Groups Separately in European ancestry individuals**

| SNP             | MRI Confirmed<br>(2612 Cases, 27725 Controls) |       |          | Standard Phenotyping<br>(3418 Cases, 221,204 Controls) |       |          | OR Ratio |
|-----------------|-----------------------------------------------|-------|----------|--------------------------------------------------------|-------|----------|----------|
|                 | OR                                            | SE    | P-value  | OR                                                     | SE    | P-value  |          |
| 18:5389832:AG   | 1.169                                         | 0.049 | 1.55E-03 | 1.231                                                  | 0.055 | 1.49E-04 | 0.950    |
| 11:47434986:AG  | 1.121                                         | 0.033 | 4.44E-04 | 1.172                                                  | 0.031 | 2.01E-07 | 0.957    |
| 6:1366718:CT    | 1.169                                         | 0.053 | 3.09E-03 | 1.186                                                  | 0.048 | 3.65E-04 | 0.986    |
| 10:105447838:CT | 1.095                                         | 0.032 | 3.91E-03 | 1.103                                                  | 0.031 | 1.42E-03 | 0.993    |
| 1:156197380:CT  | 1.119                                         | 0.032 | 4.59E-04 | 1.091                                                  | 0.031 | 4.50E-03 | 1.025    |
| 2:203968973:CT  | 1.265                                         | 0.053 | 9.99E-06 | 1.228                                                  | 0.052 | 8.86E-05 | 1.031    |
| 6:142562417:CT  | 1.132                                         | 0.037 | 7.39E-04 | 1.093                                                  | 0.036 | 1.27E-02 | 1.036    |
| 13:111040681:AG | 1.135                                         | 0.034 | 1.66E-04 | 1.093                                                  | 0.032 | 5.95E-03 | 1.039    |
| 10:124233181:CT | 1.233                                         | 0.058 | 2.87E-04 | 1.187                                                  | 0.058 | 3.03E-03 | 1.039    |
| 16:87575332:AG  | 1.170                                         | 0.032 | 6.98E-07 | 1.104                                                  | 0.031 | 1.24E-03 | 1.060    |
| 3:41839370:AT   | 1.211                                         | 0.043 | 7.40E-06 | 1.109                                                  | 0.039 | 8.29E-03 | 1.093    |
| 5:121518378:CT  | 1.234                                         | 0.042 | 6.39E-07 | 1.023                                                  | 0.051 | 6.53E-01 | 1.206    |

OR, Odds Ratio; SE, standard error; OR Ratio, Ratio of Odds Ratios between MRI Confirmed and Standard Phenotyping groups.

**Supplementary Table 14 – Associations of Genome-wide Significant Variants identified in this analysis with Epigenetic markers from Genome wide Association Studies reaching  $p < 5e-8$**

| snp        | hg19 coordinates | a1 | a2 | pmid     | tissue      | marker     | beta    | se      | p        | direction | n    |
|------------|------------------|----|----|----------|-------------|------------|---------|---------|----------|-----------|------|
| rs12445022 | chr16:87575332   | A  | G  | 27918535 | Whole blood | cg16596957 | NA      | NA      | 3.63E-63 | -         | 3841 |
| rs12445022 | chr16:87575332   | A  | G  | 27918535 | Whole blood | cg04245248 | NA      | NA      | 1.75E-56 | -         | 3841 |
| rs12445022 | chr16:87575332   | A  | G  | 27918535 | Whole blood | cg08031982 | NA      | NA      | 8.59E-55 | +         | 3841 |
| rs12445022 | chr16:87575332   | A  | G  | 27918535 | Whole blood | cg03020503 | NA      | NA      | 1.14E-41 | +         | 3841 |
| rs12445022 | chr16:87575332   | A  | G  | 27918535 | Whole blood | cg10312981 | NA      | NA      | 3.44E-25 | +         | 3841 |
| rs12445022 | chr16:87575332   | A  | G  | 27918535 | Whole blood | cg00555085 | NA      | NA      | 1.02E-24 | +         | 3841 |
| rs12445022 | chr16:87575332   | A  | G  | 27918535 | Whole blood | cg00512563 | NA      | NA      | 8.31E-18 | +         | 3841 |
| rs12445022 | chr16:87575332   | A  | G  | 27918535 | Whole blood | cg09880724 | NA      | NA      | 1.15E-11 | +         | 3841 |
| rs12445022 | chr16:87575332   | A  | G  | 27918535 | Whole blood | cg04980478 | NA      | NA      | 1.68E-09 | -         | 3841 |
| rs12445022 | chr16:87575332   | A  | G  | 27918535 | Whole blood | cg27522573 | NA      | NA      | 5.96E-09 | +         | 3841 |
| rs12445022 | chr16:87575332   | A  | G  | 27918535 | Whole blood | cg06750038 | NA      | NA      | 1.34E-08 | -         | 3841 |
| rs12445022 | chr16:87575332   | A  | G  | 27918535 | Whole blood | cg16788656 | NA      | NA      | 2.17E-08 | +         | 3841 |
| rs12445022 | chr16:87575332   | A  | G  | 27918535 | Whole blood | cg02093708 | NA      | NA      | 3.23E-08 | +         | 3841 |
| rs12445022 | chr16:87575332   | A  | G  | 27918535 | Whole blood | cg06655861 | NA      | NA      | 3.56E-08 | +         | 3841 |
| rs12445022 | chr16:87575332   | A  | G  | 27036880 | Whole blood | cg04245248 | -0.2809 | 0.04418 | 3.35E-10 | -         | 837  |
| rs12445022 | chr16:87575332   | A  | G  | 27036880 | Whole blood | cg08031982 | 0.2917  | 0.04587 | 3.32E-10 | +         | 837  |
| rs12445022 | chr16:87575332   | A  | G  | 27036880 | Cord blood  | cg04245248 | -0.3104 | 0.04366 | 2.66E-12 | -         | 771  |
| rs12445022 | chr16:87575332   | A  | G  | 27036880 | Cord blood  | cg08031982 | 0.387   | 0.04695 | 7.25E-16 | +         | 771  |
| rs12445022 | chr16:87575332   | A  | G  | 27036880 | Whole blood | cg00555085 | 0.24    | 0.0411  | 7.45E-09 | +         | 834  |
| rs12445022 | chr16:87575332   | A  | G  | 27036880 | Whole blood | cg08031982 | 0.3391  | 0.04415 | 4.50E-14 | +         | 834  |
| rs12445022 | chr16:87575332   | A  | G  | 27036880 | Whole blood | cg08031982 | 0.2891  | 0.04841 | 3.65E-09 | +         | 742  |
| rs72934535 | chr2:203968973   | C  | T  | 27918535 | Whole blood | cg16796381 | NA      | NA      | 3.71E-94 | +         | 3841 |
| rs72934535 | chr2:203968973   | C  | T  | 27918535 | Whole blood | cg13521797 | NA      | NA      | 4.11E-49 | +         | 3841 |
| rs72934535 | chr2:203968973   | C  | T  | 27918535 | Whole blood | cg14367014 | NA      | NA      | 2.36E-25 | +         | 3841 |
| rs72934535 | chr2:203968973   | C  | T  | 27918535 | Whole blood | cg05158606 | NA      | NA      | 2.28E-20 | -         | 3841 |
| rs72934535 | chr2:203968973   | C  | T  | 27918535 | Whole blood | cg17681313 | NA      | NA      | 6.40E-18 | +         | 3841 |
| rs72934535 | chr2:203968973   | C  | T  | 27918535 | Whole blood | cg26648948 | NA      | NA      | 1.39E-13 | -         | 3841 |
| rs72934535 | chr2:203968973   | C  | T  | 27918535 | Whole blood | cg27413025 | NA      | NA      | 2.72E-13 | +         | 3841 |



|            |                |   |   |          |             |            |        |         |          |   |      |
|------------|----------------|---|---|----------|-------------|------------|--------|---------|----------|---|------|
| rs72934535 | chr2:203968973 | C | T | 27036880 | Whole blood | cg16796381 | 0.5507 | 0.05864 | 5.51E-20 | + | 837  |
| rs72934535 | chr2:203968973 | C | T | 27036880 | Whole blood | cg16796381 | 0.4645 | 0.05783 | 3.64E-15 | + | 837  |
| rs72934535 | chr2:203968973 | C | T | 27036880 | Cord blood  | cg15057621 | 0.3435 | 0.05613 | 1.49E-09 | + | 771  |
| rs72934535 | chr2:203968973 | C | T | 27036880 | Cord blood  | cg16796381 | 0.3774 | 0.05824 | 1.64E-10 | + | 771  |
| rs72934535 | chr2:203968973 | C | T | 27036880 | Whole blood | cg15057621 | 0.395  | 0.05505 | 1.59E-12 | + | 834  |
| rs72934535 | chr2:203968973 | C | T | 27036880 | Whole blood | cg16796381 | 0.5303 | 0.05639 | 4.93E-20 | + | 834  |
| rs72934535 | chr2:203968973 | C | T | 27036880 | Whole blood | cg15057621 | 0.3615 | 0.05528 | 1.16E-10 | + | 742  |
| rs72934535 | chr2:203968973 | C | T | 27036880 | Whole blood | cg16796381 | 0.4292 | 0.05859 | 6.26E-13 | + | 742  |
| rs2293576  | chr11:47434986 | A | G | 27918535 | Whole blood | cg13308137 | NA     | NA      | 1.04E-57 | - | 3841 |
| rs2293576  | chr11:47434986 | A | G | 27918535 | Whole blood | cg15270729 | NA     | NA      | 4.46E-50 | + | 3841 |
| rs2293576  | chr11:47434986 | A | G | 27918535 | Whole blood | cg18512352 | NA     | NA      | 2.39E-47 | + | 3841 |
| rs2293576  | chr11:47434986 | A | G | 27918535 | Whole blood | cg04411041 | NA     | NA      | 1.30E-35 | - | 3841 |
| rs2293576  | chr11:47434986 | A | G | 27918535 | Whole blood | cg19460817 | NA     | NA      | 1.22E-31 | - | 3841 |
| rs2293576  | chr11:47434986 | A | G | 27918535 | Whole blood | cg25953688 | NA     | NA      | 1.88E-27 | - | 3841 |
| rs2293576  | chr11:47434986 | A | G | 27918535 | Whole blood | cg20135002 | NA     | NA      | 4.20E-27 | + | 3841 |
| rs2293576  | chr11:47434986 | A | G | 27918535 | Whole blood | cg18589874 | NA     | NA      | 1.37E-21 | - | 3841 |
| rs2293576  | chr11:47434986 | A | G | 27918535 | Whole blood | cg07698783 | NA     | NA      | 1.66E-16 | - | 3841 |
| rs2293576  | chr11:47434986 | A | G | 27918535 | Whole blood | cg12613344 | NA     | NA      | 1.15E-15 | - | 3841 |
| rs2293576  | chr11:47434986 | A | G | 27918535 | Whole blood | cg04959790 | NA     | NA      | 2.97E-15 | - | 3841 |
| rs2293576  | chr11:47434986 | A | G | 27918535 | Whole blood | cg19668951 | NA     | NA      | 3.47E-13 | + | 3841 |
| rs2293576  | chr11:47434986 | A | G | 27918535 | Whole blood | cg05377527 | NA     | NA      | 2.79E-12 | - | 3841 |
| rs2293576  | chr11:47434986 | A | G | 27918535 | Whole blood | cg26139080 | NA     | NA      | 9.43E-12 | + | 3841 |
| rs2293576  | chr11:47434986 | A | G | 27918535 | Whole blood | cg03393444 | NA     | NA      | 1.28E-11 | + | 3841 |
| rs2293576  | chr11:47434986 | A | G | 27918535 | Whole blood | cg17614165 | NA     | NA      | 2.50E-10 | + | 3841 |
| rs2293576  | chr11:47434986 | A | G | 27918535 | Whole blood | cg05585544 | NA     | NA      | 7.98E-10 | + | 3841 |
| rs2293576  | chr11:47434986 | A | G | 27918535 | Whole blood | cg04692506 | NA     | NA      | 9.49E-10 | + | 3841 |
| rs2293576  | chr11:47434986 | A | G | 27863251 | Monocytes   | H3K4me1    | 0.8317 | 0.1036  | 9.91E-16 | + | 172  |
| rs2293576  | chr11:47434986 | A | G | 27863251 | Neutrophils | H3K4me1    | 0.817  | 0.106   | 1.30E-14 | + | 173  |
| rs2293576  | chr11:47434986 | A | G | 27863251 | Monocytes   | cg20307385 | 1.029  | 0.0931  | 2.27E-28 | + | 196  |
| rs2293576  | chr11:47434986 | A | G | 27863251 | Neutrophils | cg20307385 | 1.009  | 0.0931  | 2.33E-27 | + | 197  |
| rs2293576  | chr11:47434986 | A | G | 27863251 | T cells     | cg20307385 | 1.02   | 0.1068  | 1.30E-21 | + | 132  |

|           |                |   |   |          |             |            |         |         |           |   |      |
|-----------|----------------|---|---|----------|-------------|------------|---------|---------|-----------|---|------|
| rs2293576 | chr11:47434986 | A | G | 27036880 | Whole blood | cg04959790 | -0.26   | 0.03871 | 3.47E-11  | - | 837  |
| rs2293576 | chr11:47434986 | A | G | 27036880 | Whole blood | cg07425170 | 0.3606  | 0.04411 | 1.09E-15  | + | 837  |
| rs2293576 | chr11:47434986 | A | G | 27036880 | Whole blood | cg10504702 | -0.2761 | 0.04508 | 1.40E-09  | - | 837  |
| rs2293576 | chr11:47434986 | A | G | 27036880 | Whole blood | cg13308137 | -0.3675 | 0.04601 | 4.54E-15  | - | 837  |
| rs2293576 | chr11:47434986 | A | G | 27036880 | Whole blood | cg20307385 | 0.5318  | 0.03469 | 6.54E-47  | + | 837  |
| rs2293576 | chr11:47434986 | A | G | 27036880 | Whole blood | cg07425170 | 0.5009  | 0.04371 | 3.69E-28  | + | 837  |
| rs2293576 | chr11:47434986 | A | G | 27036880 | Whole blood | cg13308137 | -0.3323 | 0.04659 | 2.30E-12  | - | 837  |
| rs2293576 | chr11:47434986 | A | G | 27036880 | Whole blood | cg20307385 | 0.5589  | 0.03333 | 6.01E-54  | + | 837  |
| rs2293576 | chr11:47434986 | A | G | 27036880 | Cord blood  | cg07425170 | 0.5057  | 0.04483 | 2.06E-27  | + | 771  |
| rs2293576 | chr11:47434986 | A | G | 27036880 | Cord blood  | cg13308137 | -0.3585 | 0.04737 | 1.09E-13  | - | 771  |
| rs2293576 | chr11:47434986 | A | G | 27036880 | Cord blood  | cg20307385 | 0.6095  | 0.03732 | 1.06E-51  | + | 771  |
| rs2293576 | chr11:47434986 | A | G | 27036880 | Whole blood | cg04959790 | -0.2274 | 0.03993 | 1.72E-08  | - | 834  |
| rs2293576 | chr11:47434986 | A | G | 27036880 | Whole blood | cg07425170 | 0.376   | 0.04238 | 4.32E-18  | + | 834  |
| rs2293576 | chr11:47434986 | A | G | 27036880 | Whole blood | cg13308137 | -0.3618 | 0.04694 | 3.66E-14  | - | 834  |
| rs2293576 | chr11:47434986 | A | G | 27036880 | Whole blood | cg20307385 | 0.5421  | 0.0328  | 2.82E-53  | + | 834  |
| rs2293576 | chr11:47434986 | A | G | 27036880 | Whole blood | cg04959790 | -0.2294 | 0.04033 | 1.85E-08  | - | 742  |
| rs2293576 | chr11:47434986 | A | G | 27036880 | Whole blood | cg07425170 | 0.4449  | 0.04356 | 5.40E-23  | + | 742  |
| rs2293576 | chr11:47434986 | A | G | 27036880 | Whole blood | cg13308137 | -0.3662 | 0.04649 | 1.19E-14  | - | 742  |
| rs2293576 | chr11:47434986 | A | G | 27036880 | Whole blood | cg20307385 | 0.5646  | 0.03633 | 2.35E-47  | + | 742  |
| rs4621303 | chr3:41839370  | A | T | 27918535 | Whole blood | cg02108620 | NA      | NA      | 6.31E-205 | - | 3841 |
| rs4621303 | chr3:41839370  | A | T | 27918535 | Whole blood | cg02648746 | NA      | NA      | 4.14E-116 | - | 3841 |
| rs4621303 | chr3:41839370  | A | T | 27918535 | Whole blood | cg19010139 | NA      | NA      | 1.58E-95  | + | 3841 |
| rs4621303 | chr3:41839370  | A | T | 27918535 | Whole blood | cg22222413 | NA      | NA      | 4.52E-80  | + | 3841 |
| rs4621303 | chr3:41839370  | A | T | 27918535 | Whole blood | cg03022575 | NA      | NA      | 5.34E-38  | + | 3841 |
| rs4621303 | chr3:41839370  | A | T | 27918535 | Whole blood | cg04831656 | NA      | NA      | 1.10E-32  | + | 3841 |
| rs4621303 | chr3:41839370  | A | T | 27918535 | Whole blood | cg05590619 | NA      | NA      | 8.80E-32  | + | 3841 |
| rs4621303 | chr3:41839370  | A | T | 27918535 | Whole blood | cg09809224 | NA      | NA      | 4.75E-28  | + | 3841 |
| rs4621303 | chr3:41839370  | A | T | 27918535 | Whole blood | cg12084388 | NA      | NA      | 2.70E-26  | + | 3841 |
| rs4621303 | chr3:41839370  | A | T | 27918535 | Whole blood | cg05999828 | NA      | NA      | 2.73E-19  | + | 3841 |
| rs4621303 | chr3:41839370  | A | T | 27918535 | Whole blood | cg22988851 | NA      | NA      | 2.73E-18  | + | 3841 |
| rs4621303 | chr3:41839370  | A | T | 27918535 | Whole blood | cg17224181 | NA      | NA      | 3.45E-18  | + | 3841 |

|            |                 |   |   |          |             |                   |         |         |          |   |      |
|------------|-----------------|---|---|----------|-------------|-------------------|---------|---------|----------|---|------|
| rs4621303  | chr3:41839370   | A | T | 27918535 | Whole blood | cg21185355        | NA      | NA      | 5.69E-17 | - | 3841 |
| rs4621303  | chr3:41839370   | A | T | 27918535 | Whole blood | cg02527375        | NA      | NA      | 8.02E-17 | + | 3841 |
| rs4621303  | chr3:41839370   | A | T | 27918535 | Whole blood | cg04010712        | NA      | NA      | 6.42E-12 | - | 3841 |
| rs4621303  | chr3:41839370   | A | T | 27863251 | Monocytes   | H3K27ac           | -0.8781 | 0.1484  | 3.25E-09 | - | 162  |
| rs4621303  | chr3:41839370   | A | T | 27863251 | Neutrophils | H3K27ac           | 0.8788  | 0.1395  | 3.01E-10 | + | 174  |
| rs4621303  | chr3:41839370   | A | T | 27863251 | Monocytes   | H3K4me1           | -0.8346 | 0.1407  | 3.00E-09 | - | 172  |
| rs4621303  | chr3:41839370   | A | T | 27863251 | Monocytes   | Percent-splice-in | 1.529   | 0.1147  | 1.46E-40 | + | 194  |
| rs4621303  | chr3:41839370   | A | T | 27863251 | Monocytes   | Percent-splice-in | 1.532   | 0.1144  | 6.58E-41 | + | 194  |
| rs4621303  | chr3:41839370   | A | T | 27863251 | Neutrophils | Percent-splice-in | 1.377   | 0.1203  | 2.59E-30 | + | 192  |
| rs4621303  | chr3:41839370   | A | T | 27863251 | Neutrophils | Percent-splice-in | 1.372   | 0.1206  | 5.25E-30 | + | 192  |
| rs4621303  | chr3:41839370   | A | T | 27863251 | T cells     | Percent-splice-in | 1.482   | 0.1232  | 2.51E-33 | + | 169  |
| rs4621303  | chr3:41839370   | A | T | 27863251 | T cells     | Percent-splice-in | 1.469   | 0.1241  | 2.60E-32 | + | 169  |
| rs4621303  | chr3:41839370   | A | T | 27863251 | T cells     | Percent-splice-in | 1.066   | 0.1382  | 1.23E-14 | + | 169  |
| rs4621303  | chr3:41839370   | A | T | 27863251 | Monocytes   | cg02108620        | -0.9479 | 0.1324  | 8.15E-13 | - | 196  |
| rs4621303  | chr3:41839370   | A | T | 27863251 | Monocytes   | cg03022575        | 1.125   | 0.1292  | 3.19E-18 | + | 196  |
| rs4621303  | chr3:41839370   | A | T | 27863251 | Neutrophils | cg02108620        | -1.188  | 0.1267  | 6.99E-21 | - | 197  |
| rs4621303  | chr3:41839370   | A | T | 27863251 | Neutrophils | cg03022575        | 0.8301  | 0.1343  | 6.30E-10 | + | 197  |
| rs4621303  | chr3:41839370   | A | T | 27036880 | Whole blood | cg02108620        | -0.3079 | 0.04446 | 8.73E-12 | - | 837  |
| rs4621303  | chr3:41839370   | A | T | 27036880 | Whole blood | cg03022575        | 0.3323  | 0.05101 | 1.25E-10 | + | 837  |
| rs4621303  | chr3:41839370   | A | T | 27036880 | Whole blood | cg02108620        | -0.4246 | 0.04672 | 8.65E-19 | - | 837  |
| rs4621303  | chr3:41839370   | A | T | 27036880 | Whole blood | cg03022575        | 0.3111  | 0.04851 | 2.49E-10 | + | 837  |
| rs4621303  | chr3:41839370   | A | T | 27036880 | Cord blood  | cg02108620        | -0.4453 | 0.05369 | 4.89E-16 | - | 771  |
| rs4621303  | chr3:41839370   | A | T | 27036880 | Cord blood  | cg03022575        | 0.3089  | 0.05307 | 8.61E-09 | + | 771  |
| rs4621303  | chr3:41839370   | A | T | 27036880 | Whole blood | cg02108620        | -0.331  | 0.04343 | 6.83E-14 | - | 834  |
| rs4621303  | chr3:41839370   | A | T | 27036880 | Whole blood | cg03022575        | 0.3305  | 0.0496  | 4.90E-11 | + | 834  |
| rs4621303  | chr3:41839370   | A | T | 27036880 | Whole blood | cg22222413        | 0.2735  | 0.04799 | 1.66E-08 | + | 834  |
| rs4621303  | chr3:41839370   | A | T | 27036880 | Whole blood | cg02108620        | -0.3131 | 0.04126 | 9.70E-14 | - | 742  |
| rs4621303  | chr3:41839370   | A | T | 27036880 | Whole blood | cg22222413        | 0.3191  | 0.0551  | 1.03E-08 | + | 742  |
| rs61000833 | chr10:105447838 | C | T | 27918535 | Whole blood | cg16669339        | NA      | NA      | 1.10E-93 | + | 3841 |
| rs61000833 | chr10:105447838 | C | T | 27918535 | Whole blood | cg18735015        | NA      | NA      | 1.99E-87 | + | 3841 |
| rs61000833 | chr10:105447838 | C | T | 27918535 | Whole blood | cg00492979        | NA      | NA      | 6.95E-84 | + | 3841 |

|            |                 |   |   |          |             |            |        |         |          |   |      |
|------------|-----------------|---|---|----------|-------------|------------|--------|---------|----------|---|------|
| rs61000833 | chr10:105447838 | C | T | 27918535 | Whole blood | cg19726408 | NA     | NA      | 2.47E-79 | + | 3841 |
| rs61000833 | chr10:105447838 | C | T | 27918535 | Whole blood | cg19007269 | NA     | NA      | 7.71E-64 | + | 3841 |
| rs61000833 | chr10:105447838 | C | T | 27918535 | Whole blood | cg20669641 | NA     | NA      | 8.15E-46 | + | 3841 |
| rs61000833 | chr10:105447838 | C | T | 27918535 | Whole blood | cg00126946 | NA     | NA      | 2.27E-44 | + | 3841 |
| rs61000833 | chr10:105447838 | C | T | 27918535 | Whole blood | cg23901918 | NA     | NA      | 2.54E-38 | + | 3841 |
| rs61000833 | chr10:105447838 | C | T | 27918535 | Whole blood | cg13634090 | NA     | NA      | 2.14E-31 | + | 3841 |
| rs61000833 | chr10:105447838 | C | T | 27918535 | Whole blood | cg12477923 | NA     | NA      | 5.13E-26 | - | 3841 |
| rs61000833 | chr10:105447838 | C | T | 27918535 | Whole blood | cg03880642 | NA     | NA      | 2.45E-23 | - | 3841 |
| rs61000833 | chr10:105447838 | C | T | 27918535 | Whole blood | cg26550162 | NA     | NA      | 4.16E-12 | + | 3841 |
| rs61000833 | chr10:105447838 | C | T | 27918535 | Whole blood | cg07709475 | NA     | NA      | 4.54E-12 | + | 3841 |
| rs61000833 | chr10:105447838 | C | T | 27918535 | Whole blood | cg02432295 | NA     | NA      | 6.72E-12 | + | 3841 |
| rs61000833 | chr10:105447838 | C | T | 27918535 | Whole blood | cg20386580 | NA     | NA      | 2.21E-11 | + | 3841 |
| rs61000833 | chr10:105447838 | C | T | 27918535 | Whole blood | cg02324920 | NA     | NA      | 3.09E-10 | + | 3841 |
| rs61000833 | chr10:105447838 | C | T | 27918535 | Whole blood | cg07869830 | NA     | NA      | 5.36E-10 | + | 3841 |
| rs61000833 | chr10:105447838 | C | T | 27918535 | Whole blood | cg25066490 | NA     | NA      | 7.37E-10 | + | 3841 |
| rs61000833 | chr10:105447838 | C | T | 27918535 | Whole blood | cg26378073 | NA     | NA      | 8.65E-10 | - | 3841 |
| rs61000833 | chr10:105447838 | C | T | 27918535 | Whole blood | cg04788957 | NA     | NA      | 1.28E-08 | + | 3841 |
| rs61000833 | chr10:105447838 | C | T | 27863251 | Monocytes   | cg00126946 | 0.5842 | 0.0987  | 3.30E-09 | + | 196  |
| rs61000833 | chr10:105447838 | C | T | 27036880 | Whole blood | cg00492979 | 0.3201 | 0.04118 | 2.24E-14 | + | 837  |
| rs61000833 | chr10:105447838 | C | T | 27036880 | Whole blood | cg16669339 | 0.3272 | 0.04037 | 1.87E-15 | + | 837  |
| rs61000833 | chr10:105447838 | C | T | 27036880 | Whole blood | cg18735015 | 0.3473 | 0.04033 | 3.58E-17 | + | 837  |
| rs61000833 | chr10:105447838 | C | T | 27036880 | Whole blood | cg19726408 | 0.3695 | 0.04016 | 2.77E-19 | + | 837  |
| rs61000833 | chr10:105447838 | C | T | 27036880 | Whole blood | cg00492979 | 0.2935 | 0.04228 | 8.27E-12 | + | 837  |
| rs61000833 | chr10:105447838 | C | T | 27036880 | Whole blood | cg16669339 | 0.2943 | 0.04362 | 2.96E-11 | + | 837  |
| rs61000833 | chr10:105447838 | C | T | 27036880 | Whole blood | cg18735015 | 0.3461 | 0.043   | 3.17E-15 | + | 837  |
| rs61000833 | chr10:105447838 | C | T | 27036880 | Whole blood | cg19359398 | 0.2445 | 0.04324 | 2.21E-08 | + | 837  |
| rs61000833 | chr10:105447838 | C | T | 27036880 | Whole blood | cg19726408 | 0.3408 | 0.04482 | 8.41E-14 | + | 837  |
| rs61000833 | chr10:105447838 | C | T | 27036880 | Cord blood  | cg00492979 | 0.3125 | 0.04212 | 3.14E-13 | + | 771  |
| rs61000833 | chr10:105447838 | C | T | 27036880 | Cord blood  | cg16669339 | 0.3351 | 0.04205 | 5.82E-15 | + | 771  |
| rs61000833 | chr10:105447838 | C | T | 27036880 | Cord blood  | cg18735015 | 0.3423 | 0.04099 | 3.17E-16 | + | 771  |
| rs61000833 | chr10:105447838 | C | T | 27036880 | Cord blood  | cg19726408 | 0.2909 | 0.04178 | 7.17E-12 | + | 771  |

|            |                 |   |   |          |             |            |         |         |          |   |      |
|------------|-----------------|---|---|----------|-------------|------------|---------|---------|----------|---|------|
| rs61000833 | chr10:105447838 | C | T | 27036880 | Whole blood | cg00492979 | 0.3526  | 0.04223 | 2.87E-16 | + | 834  |
| rs61000833 | chr10:105447838 | C | T | 27036880 | Whole blood | cg16669339 | 0.297   | 0.04193 | 2.98E-12 | + | 834  |
| rs61000833 | chr10:105447838 | C | T | 27036880 | Whole blood | cg18735015 | 0.3395  | 0.04065 | 2.79E-16 | + | 834  |
| rs61000833 | chr10:105447838 | C | T | 27036880 | Whole blood | cg19726408 | 0.3578  | 0.03829 | 8.30E-20 | + | 834  |
| rs61000833 | chr10:105447838 | C | T | 27036880 | Whole blood | cg16669339 | 0.2602  | 0.04629 | 2.70E-08 | + | 742  |
| rs61000833 | chr10:105447838 | C | T | 27036880 | Whole blood | cg18735015 | 0.2795  | 0.04581 | 1.70E-09 | + | 742  |
| rs79043147 | chr10:124233181 | C | T | 27918535 | Whole blood | cg19863426 | NA      | NA      | 8.16E-28 | + | 3841 |
| rs79043147 | chr10:124233181 | C | T | 27036880 | Whole blood | cg03623097 | -0.4311 | 0.07628 | 2.19E-08 | - | 837  |
| rs2984613  | chr1:156197380  | C | T | 27918535 | Whole blood | cg07384080 | NA      | NA      | 9.41E-47 | - | 3841 |
| rs2984613  | chr1:156197380  | C | T | 27918535 | Whole blood | cg20302342 | NA      | NA      | 3.20E-36 | + | 3841 |
| rs2984613  | chr1:156197380  | C | T | 27918535 | Whole blood | cg12036877 | NA      | NA      | 3.94E-27 | + | 3841 |
| rs2984613  | chr1:156197380  | C | T | 27918535 | Whole blood | cg14500718 | NA      | NA      | 1.50E-26 | - | 3841 |
| rs2984613  | chr1:156197380  | C | T | 27918535 | Whole blood | cg11580676 | NA      | NA      | 3.40E-26 | + | 3841 |
| rs2984613  | chr1:156197380  | C | T | 27918535 | Whole blood | cg15685922 | NA      | NA      | 2.63E-24 | + | 3841 |
| rs2984613  | chr1:156197380  | C | T | 27918535 | Whole blood | cg13282594 | NA      | NA      | 2.76E-24 | + | 3841 |
| rs2984613  | chr1:156197380  | C | T | 27918535 | Whole blood | cg25133887 | NA      | NA      | 1.75E-23 | + | 3841 |
| rs2984613  | chr1:156197380  | C | T | 27918535 | Whole blood | cg24843609 | NA      | NA      | 3.99E-19 | + | 3841 |
| rs2984613  | chr1:156197380  | C | T | 27918535 | Whole blood | cg24674445 | NA      | NA      | 1.15E-18 | - | 3841 |
| rs2984613  | chr1:156197380  | C | T | 27918535 | Whole blood | cg14663278 | NA      | NA      | 1.28E-18 | + | 3841 |
| rs2984613  | chr1:156197380  | C | T | 27918535 | Whole blood | cg11519176 | NA      | NA      | 2.28E-17 | + | 3841 |
| rs2984613  | chr1:156197380  | C | T | 27918535 | Whole blood | cg16558208 | NA      | NA      | 1.44E-16 | + | 3841 |
| rs2984613  | chr1:156197380  | C | T | 27918535 | Whole blood | cg05532239 | NA      | NA      | 4.89E-15 | - | 3841 |
| rs2984613  | chr1:156197380  | C | T | 27918535 | Whole blood | cg18973101 | NA      | NA      | 5.80E-15 | + | 3841 |
| rs2984613  | chr1:156197380  | C | T | 27918535 | Whole blood | cg10585648 | NA      | NA      | 4.03E-14 | - | 3841 |
| rs2984613  | chr1:156197380  | C | T | 27918535 | Whole blood | cg17419597 | NA      | NA      | 9.61E-14 | + | 3841 |
| rs2984613  | chr1:156197380  | C | T | 27918535 | Whole blood | cg23729443 | NA      | NA      | 1.37E-13 | + | 3841 |
| rs2984613  | chr1:156197380  | C | T | 27918535 | Whole blood | cg18993334 | NA      | NA      | 2.03E-13 | - | 3841 |
| rs2984613  | chr1:156197380  | C | T | 27918535 | Whole blood | cg09996284 | NA      | NA      | 1.09E-12 | + | 3841 |
| rs2984613  | chr1:156197380  | C | T | 27918535 | Whole blood | cg19372602 | NA      | NA      | 1.33E-11 | + | 3841 |
| rs2984613  | chr1:156197380  | C | T | 27918535 | Whole blood | cg11075509 | NA      | NA      | 6.13E-10 | + | 3841 |
| rs2984613  | chr1:156197380  | C | T | 27918535 | Whole blood | cg18276016 | NA      | NA      | 6.03E-09 | - | 3841 |

|            |                 |   |   |          |             |                   |         |         |           |   |      |
|------------|-----------------|---|---|----------|-------------|-------------------|---------|---------|-----------|---|------|
| rs2984613  | chr1:156197380  | C | T | 27863251 | Monocytes   | Percent-splice-in | 1.053   | 0.0858  | 1.35E-34  | + | 194  |
| rs2984613  | chr1:156197380  | C | T | 27863251 | Neutrophils | Percent-splice-in | 0.6197  | 0.0975  | 2.08E-10  | + | 192  |
| rs2984613  | chr1:156197380  | C | T | 27863251 | T cells     | Percent-splice-in | 1.076   | 0.0908  | 2.05E-32  | + | 169  |
| rs2984613  | chr1:156197380  | C | T | 27863251 | Monocytes   | cg24450063        | -1.111  | 0.0826  | 3.23E-41  | - | 196  |
| rs2984613  | chr1:156197380  | C | T | 27863251 | Monocytes   | cg24849049        | -0.7551 | 0.0945  | 1.31E-15  | - | 196  |
| rs2984613  | chr1:156197380  | C | T | 27863251 | Monocytes   | cg25208724        | -1.092  | 0.0835  | 4.56E-39  | - | 196  |
| rs2984613  | chr1:156197380  | C | T | 27863251 | Neutrophils | cg24450063        | -1.085  | 0.0839  | 3.04E-38  | - | 197  |
| rs2984613  | chr1:156197380  | C | T | 27863251 | Neutrophils | cg25208724        | -1.038  | 0.0857  | 8.90E-34  | - | 197  |
| rs2984613  | chr1:156197380  | C | T | 27863251 | T cells     | cg06970220        | -0.6947 | 0.1185  | 4.58E-09  | - | 132  |
| rs2984613  | chr1:156197380  | C | T | 27863251 | T cells     | cg24450063        | -1.052  | 0.1067  | 6.45E-23  | - | 132  |
| rs2984613  | chr1:156197380  | C | T | 27863251 | T cells     | cg25208724        | -1.098  | 0.1045  | 8.37E-26  | - | 132  |
| rs2984613  | chr1:156197380  | C | T | 27036880 | Whole blood | cg06970220        | -0.3518 | 0.02924 | 7.51E-31  | - | 837  |
| rs2984613  | chr1:156197380  | C | T | 27036880 | Whole blood | cg24450063        | -0.8452 | 0.03236 | 2.09E-110 | - | 837  |
| rs2984613  | chr1:156197380  | C | T | 27036880 | Whole blood | cg25208724        | -0.8534 | 0.03193 | 3.11E-114 | - | 837  |
| rs2984613  | chr1:156197380  | C | T | 27036880 | Whole blood | cg06970220        | -0.3362 | 0.03383 | 5.81E-22  | - | 837  |
| rs2984613  | chr1:156197380  | C | T | 27036880 | Whole blood | cg24450063        | -0.8714 | 0.03559 | 4.01E-98  | - | 837  |
| rs2984613  | chr1:156197380  | C | T | 27036880 | Whole blood | cg25208724        | -0.9032 | 0.03555 | 1.30E-103 | - | 837  |
| rs2984613  | chr1:156197380  | C | T | 27036880 | Cord blood  | cg06970220        | -0.3984 | 0.03312 | 1.14E-30  | - | 771  |
| rs2984613  | chr1:156197380  | C | T | 27036880 | Cord blood  | cg07384080        | -0.1946 | 0.0329  | 5.01E-09  | - | 771  |
| rs2984613  | chr1:156197380  | C | T | 27036880 | Cord blood  | cg24450063        | -0.8201 | 0.03511 | 1.30E-91  | - | 771  |
| rs2984613  | chr1:156197380  | C | T | 27036880 | Cord blood  | cg25208724        | -0.8496 | 0.03399 | 2.17E-101 | - | 771  |
| rs2984613  | chr1:156197380  | C | T | 27036880 | Whole blood | cg06970220        | -0.3934 | 0.03106 | 9.47E-34  | - | 834  |
| rs2984613  | chr1:156197380  | C | T | 27036880 | Whole blood | cg24450063        | -0.8368 | 0.03215 | 9.58E-110 | - | 834  |
| rs2984613  | chr1:156197380  | C | T | 27036880 | Whole blood | cg25208724        | -0.8583 | 0.03176 | 6.05E-116 | - | 834  |
| rs2984613  | chr1:156197380  | C | T | 27036880 | Whole blood | cg06970220        | -0.4337 | 0.03318 | 2.76E-35  | - | 742  |
| rs2984613  | chr1:156197380  | C | T | 27036880 | Whole blood | cg07384080        | -0.2002 | 0.03199 | 6.59E-10  | - | 742  |
| rs2984613  | chr1:156197380  | C | T | 27036880 | Whole blood | cg24450063        | -0.9013 | 0.03568 | 5.07E-102 | - | 742  |
| rs2984613  | chr1:156197380  | C | T | 27036880 | Whole blood | cg25208724        | -0.8736 | 0.03697 | 2.07E-92  | - | 742  |
| rs11838776 | chr13:111040681 | A | G | 27918535 | Whole blood | cg05272587        | NA      | NA      | 2.50E-256 | - | 3841 |
| rs11838776 | chr13:111040681 | A | G | 27918535 | Whole blood | cg15455643        | NA      | NA      | 9.68E-167 | + | 3841 |
| rs11838776 | chr13:111040681 | A | G | 27918535 | Whole blood | cg06243866        | NA      | NA      | 2.41E-112 | - | 3841 |

|            |                 |   |   |          |             |            |         |         |           |   |      |
|------------|-----------------|---|---|----------|-------------|------------|---------|---------|-----------|---|------|
| rs11838776 | chr13:111040681 | A | G | 27918535 | Whole blood | cg03482866 | NA      | NA      | 4.37E-108 | + | 3841 |
| rs11838776 | chr13:111040681 | A | G | 27918535 | Whole blood | cg08009184 | NA      | NA      | 1.93E-56  | - | 3841 |
| rs11838776 | chr13:111040681 | A | G | 27918535 | Whole blood | cg08959039 | NA      | NA      | 4.09E-49  | - | 3841 |
| rs11838776 | chr13:111040681 | A | G | 27918535 | Whole blood | cg24844377 | NA      | NA      | 4.86E-32  | + | 3841 |
| rs11838776 | chr13:111040681 | A | G | 27918535 | Whole blood | cg08556772 | NA      | NA      | 3.47E-24  | - | 3841 |
| rs11838776 | chr13:111040681 | A | G | 27918535 | Whole blood | cg18114040 | NA      | NA      | 7.25E-16  | - | 3841 |
| rs11838776 | chr13:111040681 | A | G | 27918535 | Whole blood | cg07980027 | NA      | NA      | 2.99E-13  | - | 3841 |
| rs11838776 | chr13:111040681 | A | G | 27918535 | Whole blood | cg24371954 | NA      | NA      | 4.55E-13  | + | 3841 |
| rs11838776 | chr13:111040681 | A | G | 27918535 | Whole blood | cg14534089 | NA      | NA      | 1.43E-12  | - | 3841 |
| rs11838776 | chr13:111040681 | A | G | 27918535 | Whole blood | cg04819250 | NA      | NA      | 9.76E-12  | + | 3841 |
| rs11838776 | chr13:111040681 | A | G | 27918535 | Whole blood | cg02577394 | NA      | NA      | 1.55E-11  | + | 3841 |
| rs11838776 | chr13:111040681 | A | G | 27918535 | Whole blood | cg11096515 | NA      | NA      | 1.56E-09  | - | 3841 |
| rs11838776 | chr13:111040681 | A | G | 27918535 | Whole blood | cg13153710 | NA      | NA      | 2.35E-09  | - | 3841 |
| rs11838776 | chr13:111040681 | A | G | 27918535 | Whole blood | cg11438287 | NA      | NA      | 6.92E-09  | - | 3841 |
| rs11838776 | chr13:111040681 | A | G | 27918535 | Whole blood | cg03178404 | NA      | NA      | 1.28E-08  | - | 3841 |
| rs11838776 | chr13:111040681 | A | G | 27863251 | Monocytes   | cg06243866 | -0.7364 | 0.1034  | 1.09E-12  | - | 196  |
| rs11838776 | chr13:111040681 | A | G | 27863251 | Monocytes   | cg12573318 | 0.7788  | 0.1024  | 2.84E-14  | + | 196  |
| rs11838776 | chr13:111040681 | A | G | 27863251 | Monocytes   | cg15455643 | 0.6236  | 0.1059  | 3.95E-09  | + | 196  |
| rs11838776 | chr13:111040681 | A | G | 27863251 | Monocytes   | cg26053697 | 0.8407  | 0.1011  | 9.00E-17  | + | 196  |
| rs11838776 | chr13:111040681 | A | G | 27863251 | Neutrophils | cg00994389 | 0.6606  | 0.105   | 3.20E-10  | + | 197  |
| rs11838776 | chr13:111040681 | A | G | 27863251 | Neutrophils | cg12573318 | 0.7196  | 0.1038  | 4.07E-12  | + | 197  |
| rs11838776 | chr13:111040681 | A | G | 27863251 | Neutrophils | cg15455643 | 0.605   | 0.1059  | 1.13E-08  | + | 197  |
| rs11838776 | chr13:111040681 | A | G | 27863251 | Neutrophils | cg26053697 | 0.8348  | 0.1009  | 1.26E-16  | + | 197  |
| rs11838776 | chr13:111040681 | A | G | 27863251 | T cells     | cg00994389 | 0.8049  | 0.1281  | 3.28E-10  | + | 132  |
| rs11838776 | chr13:111040681 | A | G | 27863251 | T cells     | cg12573318 | 0.8945  | 0.1255  | 1.04E-12  | + | 132  |
| rs11838776 | chr13:111040681 | A | G | 27863251 | T cells     | cg15455643 | 0.7789  | 0.1293  | 1.73E-09  | + | 132  |
| rs11838776 | chr13:111040681 | A | G | 27863251 | T cells     | cg26053697 | 0.9177  | 0.1252  | 2.28E-13  | + | 132  |
| rs11838776 | chr13:111040681 | A | G | 27036880 | Whole blood | cg03482866 | 0.372   | 0.04533 | 8.53E-16  | + | 837  |
| rs11838776 | chr13:111040681 | A | G | 27036880 | Whole blood | cg05272587 | -0.5437 | 0.04434 | 6.69E-32  | - | 837  |
| rs11838776 | chr13:111040681 | A | G | 27036880 | Whole blood | cg06243866 | -0.3566 | 0.04437 | 3.14E-15  | - | 837  |
| rs11838776 | chr13:111040681 | A | G | 27036880 | Whole blood | cg08009184 | -0.2843 | 0.04739 | 2.97E-09  | - | 837  |

|            |                 |   |   |          |             |            |         |         |           |   |      |
|------------|-----------------|---|---|----------|-------------|------------|---------|---------|-----------|---|------|
| rs11838776 | chr13:111040681 | A | G | 27036880 | Whole blood | cg08959039 | -0.2665 | 0.04759 | 2.92E-08  | - | 837  |
| rs11838776 | chr13:111040681 | A | G | 27036880 | Whole blood | cg15455643 | 0.5009  | 0.04411 | 6.73E-28  | + | 837  |
| rs11838776 | chr13:111040681 | A | G | 27036880 | Whole blood | cg26053697 | 0.6779  | 0.04128 | 1.01E-52  | + | 837  |
| rs11838776 | chr13:111040681 | A | G | 27036880 | Whole blood | cg03482866 | 0.5567  | 0.0457  | 2.60E-31  | + | 837  |
| rs11838776 | chr13:111040681 | A | G | 27036880 | Whole blood | cg05272587 | -0.5228 | 0.04555 | 3.12E-28  | - | 837  |
| rs11838776 | chr13:111040681 | A | G | 27036880 | Whole blood | cg06243866 | -0.273  | 0.04554 | 3.17E-09  | - | 837  |
| rs11838776 | chr13:111040681 | A | G | 27036880 | Whole blood | cg08959039 | -0.3076 | 0.05029 | 1.52E-09  | - | 837  |
| rs11838776 | chr13:111040681 | A | G | 27036880 | Whole blood | cg15455643 | 0.6115  | 0.04428 | 7.00E-39  | + | 837  |
| rs11838776 | chr13:111040681 | A | G | 27036880 | Whole blood | cg26053697 | 0.7287  | 0.04186 | 2.08E-57  | + | 837  |
| rs11838776 | chr13:111040681 | A | G | 27036880 | Cord blood  | cg03482866 | 0.4402  | 0.049   | 2.00E-18  | + | 771  |
| rs11838776 | chr13:111040681 | A | G | 27036880 | Cord blood  | cg05272587 | -0.3946 | 0.04865 | 1.98E-15  | - | 771  |
| rs11838776 | chr13:111040681 | A | G | 27036880 | Cord blood  | cg06243866 | -0.3418 | 0.04761 | 1.66E-12  | - | 771  |
| rs11838776 | chr13:111040681 | A | G | 27036880 | Cord blood  | cg15455643 | 0.5924  | 0.04636 | 4.74E-34  | + | 771  |
| rs11838776 | chr13:111040681 | A | G | 27036880 | Cord blood  | cg26053697 | 0.6994  | 0.04466 | 3.47E-48  | + | 771  |
| rs11838776 | chr13:111040681 | A | G | 27036880 | Whole blood | cg03482866 | 0.4539  | 0.04608 | 9.97E-22  | + | 834  |
| rs11838776 | chr13:111040681 | A | G | 27036880 | Whole blood | cg05272587 | -0.5137 | 0.04467 | 1.66E-28  | - | 834  |
| rs11838776 | chr13:111040681 | A | G | 27036880 | Whole blood | cg06243866 | -0.3231 | 0.04357 | 2.99E-13  | - | 834  |
| rs11838776 | chr13:111040681 | A | G | 27036880 | Whole blood | cg08009184 | -0.2977 | 0.04667 | 2.98E-10  | - | 834  |
| rs11838776 | chr13:111040681 | A | G | 27036880 | Whole blood | cg15455643 | 0.5588  | 0.04294 | 2.27E-35  | + | 834  |
| rs11838776 | chr13:111040681 | A | G | 27036880 | Whole blood | cg26053697 | 0.7431  | 0.03997 | 8.46E-65  | + | 834  |
| rs11838776 | chr13:111040681 | A | G | 27036880 | Whole blood | cg03482866 | 0.5014  | 0.04867 | 2.41E-23  | + | 742  |
| rs11838776 | chr13:111040681 | A | G | 27036880 | Whole blood | cg05272587 | -0.442  | 0.04716 | 8.38E-20  | - | 742  |
| rs11838776 | chr13:111040681 | A | G | 27036880 | Whole blood | cg06243866 | -0.3124 | 0.04701 | 5.85E-11  | - | 742  |
| rs11838776 | chr13:111040681 | A | G | 27036880 | Whole blood | cg15455643 | 0.6003  | 0.04763 | 3.85E-33  | + | 742  |
| rs11838776 | chr13:111040681 | A | G | 27036880 | Whole blood | cg26053697 | 0.6574  | 0.0441  | 3.89E-44  | + | 742  |
| rs2303655  | chr5:121518378  | T | C | 27918535 | Whole blood | cg02601475 | NA      | NA      | 7.44E-120 | + | 3841 |
| rs2303655  | chr5:121518378  | T | C | 27918535 | Whole blood | cg22282672 | NA      | NA      | 1.34E-44  | + | 3841 |
| rs2303655  | chr5:121518378  | T | C | 27918535 | Whole blood | cg11560600 | NA      | NA      | 2.32E-33  | + | 3841 |
| rs2303655  | chr5:121518378  | T | C | 27918535 | Whole blood | cg18637698 | NA      | NA      | 8.15E-24  | - | 3841 |
| rs2303655  | chr5:121518378  | T | C | 27918535 | Whole blood | cg05982301 | NA      | NA      | 4.46E-23  | - | 3841 |
| rs2303655  | chr5:121518378  | T | C | 27918535 | Whole blood | cg03553758 | NA      | NA      | 6.72E-21  | + | 3841 |



|           |                |   |   |          |             |            |         |         |           |   |      |
|-----------|----------------|---|---|----------|-------------|------------|---------|---------|-----------|---|------|
| rs2303655 | chr5:121518378 | T | C | 27918535 | Whole blood | cg24150325 | NA      | NA      | 7.28E-13  | - | 3841 |
| rs2303655 | chr5:121518378 | T | C | 27918535 | Whole blood | cg19083497 | NA      | NA      | 2.37E-11  | + | 3841 |
| rs2303655 | chr5:121518378 | T | C | 27918535 | Whole blood | cg04747322 | NA      | NA      | 6.02E-11  | - | 3841 |
| rs2303655 | chr5:121518378 | T | C | 27918535 | Whole blood | cg01790628 | NA      | NA      | 2.92E-10  | - | 3841 |
| rs2303655 | chr5:121518378 | T | C | 27918535 | Whole blood | cg00637695 | NA      | NA      | 9.00E-10  | - | 3841 |
| rs2303655 | chr5:121518378 | T | C | 27918535 | Whole blood | cg07195301 | NA      | NA      | 1.72E-09  | + | 3841 |
| rs2303655 | chr5:121518378 | T | C | 27918535 | Whole blood | cg14122403 | NA      | NA      | 4.69E-08  | - | 3841 |
| rs2303655 | chr5:121518378 | T | C | 27863251 | Monocytes   | cg22282672 | 0.7513  | 0.1342  | 2.15E-08  | + | 196  |
| rs2303655 | chr5:121518378 | T | C | 27863251 | Neutrophils | cg02601475 | 0.7346  | 0.1347  | 4.95E-08  | + | 197  |
| rs2303655 | chr5:121518378 | T | C | 27036880 | Whole blood | cg02601475 | 0.4891  | 0.05076 | 6.54E-21  | + | 837  |
| rs2303655 | chr5:121518378 | T | C | 27036880 | Whole blood | cg02601475 | 0.6742  | 0.05203 | 7.55E-35  | + | 837  |
| rs2303655 | chr5:121518378 | T | C | 27036880 | Cord blood  | cg02601475 | 0.6112  | 0.05424 | 2.27E-27  | + | 771  |
| rs2303655 | chr5:121518378 | T | C | 27036880 | Whole blood | cg02601475 | 0.4802  | 0.04944 | 3.40E-21  | + | 834  |
| rs2303655 | chr5:121518378 | T | C | 27036880 | Whole blood | cg02601475 | 0.4402  | 0.051   | 3.67E-17  | + | 742  |
| rs7766042 | chr6:1366718   | C | T | 27918535 | Whole blood | cg15105476 | NA      | NA      | 2.31E-267 | - | 3841 |
| rs7766042 | chr6:1366718   | C | T | 27918535 | Whole blood | cg00664405 | NA      | NA      | 1.71E-25  | + | 3841 |
| rs7766042 | chr6:1366718   | C | T | 27918535 | Whole blood | cg02359433 | NA      | NA      | 3.63E-24  | + | 3841 |
| rs7766042 | chr6:1366718   | C | T | 27918535 | Whole blood | cg05964950 | NA      | NA      | 7.20E-12  | + | 3841 |
| rs7766042 | chr6:1366718   | C | T | 27918535 | Whole blood | cg05804139 | NA      | NA      | 3.95E-10  | - | 3841 |
| rs7766042 | chr6:1366718   | C | T | 27918535 | Whole blood | cg01764198 | NA      | NA      | 2.96E-08  | - | 3841 |
| rs225744  | chr6:142562417 | C | T | 27918535 | Whole blood | cg26365690 | NA      | NA      | 7.39E-55  | - | 3841 |
| rs225744  | chr6:142562417 | C | T | 27918535 | Whole blood | cg24924958 | NA      | NA      | 7.15E-48  | - | 3841 |
| rs225744  | chr6:142562417 | C | T | 27918535 | Whole blood | cg21460020 | NA      | NA      | 1.17E-42  | - | 3841 |
| rs225744  | chr6:142562417 | C | T | 27918535 | Whole blood | cg13202845 | NA      | NA      | 2.59E-34  | - | 3841 |
| rs225744  | chr6:142562417 | C | T | 27918535 | Whole blood | cg23833425 | NA      | NA      | 2.27E-32  | + | 3841 |
| rs225744  | chr6:142562417 | C | T | 27918535 | Whole blood | cg17345081 | NA      | NA      | 4.32E-15  | - | 3841 |
| rs225744  | chr6:142562417 | C | T | 27918535 | Whole blood | cg18425786 | NA      | NA      | 8.29E-12  | - | 3841 |
| rs225744  | chr6:142562417 | C | T | 27918535 | Whole blood | cg13379208 | NA      | NA      | 1.13E-08  | + | 3841 |
| rs225744  | chr6:142562417 | C | T | 27918535 | Whole blood | cg17256157 | NA      | NA      | 1.21E-08  | - | 3841 |
| rs225744  | chr6:142562417 | C | T | 27036880 | Whole blood | cg21460020 | -0.273  | 0.04789 | 1.65E-08  | - | 837  |
| rs225744  | chr6:142562417 | C | T | 27036880 | Whole blood | cg24924958 | -0.3434 | 0.0472  | 7.90E-13  | - | 837  |

|          |                |   |   |          |             |            |         |         |          |   |     |
|----------|----------------|---|---|----------|-------------|------------|---------|---------|----------|---|-----|
| rs225744 | chr6:142562417 | C | T | 27036880 | Whole blood | cg24924958 | -0.3765 | 0.05139 | 5.99E-13 | - | 837 |
| rs225744 | chr6:142562417 | C | T | 27036880 | Cord blood  | cg24924958 | -0.3226 | 0.05091 | 4.00E-10 | - | 771 |
| rs225744 | chr6:142562417 | C | T | 27036880 | Whole blood | cg24924958 | -0.3102 | 0.04615 | 3.33E-11 | - | 834 |
| rs225744 | chr6:142562417 | C | T | 27036880 | Whole blood | cg26365690 | -0.2729 | 0.04675 | 7.61E-09 | - | 834 |
| rs225744 | chr6:142562417 | C | T | 27036880 | Whole blood | cg24924958 | -0.3402 | 0.05078 | 4.17E-11 | - | 742 |

**Supplementary Table 15 – Potentially Druggable Genes Identified in DGIdb database**

| <b>search term</b> | <b>match term</b> | <b>match type</b> | <b>category</b>              | <b>sources</b>                    |
|--------------------|-------------------|-------------------|------------------------------|-----------------------------------|
| COL4A2             | COL4A2            | Definite          | DRUGGABLE GENOME             | HingoraniCasas                    |
| ULK4               | ULK4              | Definite          | SERINE THREONINE KINASE      | dGene GuideToPharmacologyGenes GO |
| ULK4               | ULK4              | Definite          | DRUGGABLE GENOME             | dGene RussLampel HingoraniCasas   |
| ULK4               | ULK4              | Definite          | KINASE                       | GuideToPharmacologyGenes GO       |
| SPI1               | SPI1              | Definite          | HISTONE MODIFICATION         | GO                                |
| SPI1               | SPI1              | Definite          | TRANSCRIPTION FACTOR BINDING | GO                                |
| SLC39A13           | SLC39A13          | Definite          | TRANSPORTER                  | GuideToPharmacologyGenes GO       |
| PSMC3              | PSMC3             | Definite          | TUMOR SUPPRESSOR             | GO                                |
| PSMC3              | PSMC3             | Definite          | TRANSCRIPTION FACTOR BINDING | GO                                |
| SLC25A44           | SLC25A44          | Definite          | TRANSPORTER                  | GO GuideToPharmacologyGenes       |
| SLC25A44           | SLC25A44          | Definite          | DRUGGABLE GENOME             | RussLampel                        |
| PMF1               | PMF1              | Definite          | TRANSCRIPTION FACTOR COMPLEX | GO                                |
| BGLAP              | BGLAP             | Definite          | DRUGGABLE GENOME             | HingoraniCasas                    |
| BGLAP              | BGLAP             | Definite          | DRUG RESISTANCE              | GO                                |
| LOX                | LOX               | Definite          | DRUG RESISTANCE              | GO                                |
| LOX                | LOX               | Definite          | DRUGGABLE GENOME             | HingoraniCasas                    |
| FOXF2              | FOXF2             | Definite          | TRANSCRIPTION FACTOR COMPLEX | GO                                |
| FOXF2              | FOXF2             | Definite          | TRANSCRIPTION FACTOR BINDING | GO                                |
| HTRA1              | HTRA1             | Definite          | DRUGGABLE GENOME             | HingoraniCasas dGene RussLampel   |
| HTRA1              | HTRA1             | Definite          | PROTEASE                     | dGene GO                          |

## Description of Study Populations

### UK-young lacunar stroke DNA resource (DNA Lacunar)

A total of 1,029 Caucasian patients with lacunar stroke, aged  $\leq 70$  years, were recruited from 72 specialist's stroke centres throughout the UK between 2002 and 2012, as part of the Young Lacunar Stroke DNA Resource. DNA samples were available in 930 patients. An additional 82 Caucasian patients of all ages with lacunar stroke were recruited from St. George's Hospital, London as part of the GENESIS study.<sup>83</sup> Lacunar stroke was defined as a clinical lacunar syndrome, with an anatomically compatible lesion on MRI (subcortical infarct  $\leq 15$  mm in diameter). All patients underwent full stroke investigation including brain MRI, imaging of the carotid arteries and ECG. Echocardiography was performed when appropriate. All MRIs and clinical histories were reviewed centrally by one physician. Exclusion criteria were: stenosis  $>50\%$  in the extra-or intracranial cerebral vessels, or previous carotid endarterectomy; cardioembolic source of stroke, defined according to the TOAST (Trial of Org 10172 in Acute Stroke Treatment) criteria as high or moderate probability; cortical infarct on MRI; subcortical infarct  $> 15$ mm in diameter, as these can be caused by embolic mechanisms (striatocapsular infarcts); any other specific cause of stroke (e.g. lupus anticoagulant, cerebral vasculitis, dissection, monogenic cause of stroke). All cases were screened for NOTCH3 CADASIL and Fabry disease mutations and positive cases excluded. Unrelated Caucasian controls, free of clinical cerebrovascular disease, were obtained by random sampling, stratified for age and sex, from general practice lists from the same geographical location as the patients. All patients and controls underwent a standardized clinical assessment and completed a standardized study questionnaire. MRI was not performed in controls. The study was approved by the Multi-Centre Research Ethics Committee (04/MRE00/36) and informed consent was obtained from all participants.

### DNA Lacunar 2

DNA Lacunar 2 is a prospective study that recruits patients with MRI confirmed lacunar stroke from 54 hospital within the UK. Patients are recruited from in and out-patient stroke, neurology and medical services. For entry patients need to have a clinical lacunar stroke with an anatomically corresponding lacunar infarct confirmed on MRI, with this infarct confirmed on diffusion weighted imaging for MRI performed in the lacunar stroke should have occurred within two years of recruitment, and the MRI should have been performed within one year of stroke. Exclusion criteria included: Patient unwilling or unable to consent; Any other potential coexistent cause of white matter disease (e.g. demyelination); Any cause of stroke other than SVD including cerebral large artery disease  $>50\%$ , cardioembolic source- classified as moderate on TOAST classification or a subcortical infarct  $> 1.5$ cm diameter as these striatocapsular infarcts are often due to emboli; age  $<18$  years; MRI scan of inadequate quality to allow image analysis. For inclusion patients needed to have, as a minimum, the following routine clinical investigations performed to allow determination of whether the patients meet the above inclusion/exclusion criteria: brain MRI; Imaging of the extracerebral arteries with Doppler ultrasound, or CT or MR angiography; and electrocardiography. For posterior circulation lacunes including thalamic lacunes, a CTA or MRA was required to allow exclusion of vertebro-basilar stenosis. All patients were reviewed in the co-ordinating

centre with original MRI scans to confirmed eligibility by a neurologist. The study was approved by the East of England - Cambridge Central Research Ethics Committee (16/EE/0201).

### **SGUL Stroke Register**

This study recruited patients attending cerebrovascular services at St. George's Hospital, London between 2007-2011. All patients had clinically relevant diagnostic workup performed, including brain imaging with magnetic resonance imaging (MRI) as well as ancillary diagnostic investigations including duplex ultrasonography of the carotid and vertebral arteries, echocardiography, Holter monitoring, magnetic resonance angiography (MRA), CT-angiography (CTA) and blood tests

### **GENESIS**

This study recruited patients attending cerebrovascular services at St. George's Hospital, London between 2011-2013. All patients had clinically relevant diagnostic workup performed, including brain imaging with magnetic resonance imaging (MRI) as well as ancillary diagnostic investigations including duplex ultrasonography of the carotid and vertebral arteries, echocardiography, Holter monitoring, magnetic resonance angiography (MRA), CT-angiography (CTA) and blood tests.

### **PRESERVE**

The PRESERVE study was a 2-year, multicenter, randomized clinical trial that tests standard vs intensive BP treatment regimens in patients with severe SVD on outcomes of WM disease (assessed by diffusion-tensor imaging) and cognition. Patients with clinical and radiological features of cerebral small vessel disease were recruited from sites in the UK. Seventy patients with hypertension and with magnetic resonance imaging–confirmed symptomatic lacunar infarct and confluent white matter hyperintensities were recruited between February 29, 2012, and October 21, 2015.

### **Edinburgh Mild Stroke Study**

The Edinburgh Mild Stroke Study (MSS) is a prospective study of patients with recent (within 3 months) clinical lacunar or mild cortical ischaemic stroke. All patients were assessed by an experienced stroke physician. Patients underwent investigations for stroke as indicated including magnetic resonance imaging (MRI) at presentation. Patients had diagnostic brain MRI at presentation, on a 1.5 T MR scanner (Signa LX; General Electric, GE Company, Fairfield, CT, US) with 22 mT/m maximum strength gradients. Diagnostic MRI included axial diffusion-weighted, T2-weighted, fluid-attenuated inversion recovery (FLAIR) and gradient echo sequences.

### **Australian Stroke Genetics Collaborative**

Stroke cases comprised European-ancestry patients admitted to four clinical centres across Australia (The Neurosciences Department at Gosford Hospital, Gosford, New South Wales (NSW); the Neurology Department at John Hunter Hospital, Newcastle, NSW; The Queen Elizabeth Hospital, Adelaide; and the Royal Perth Hospital, Perth) between 2003 and 2008. Stroke was defined by WHO criteria as a sudden focal neurologic deficit of vascular origin, lasting more than 24 hours and confirmed by brain imaging. Other investigative tests such as electrocardiogram, carotid Doppler and trans-oesophageal echocardiogram were conducted to define stroke aetiology as clinically appropriate.

### **Leuven Stroke Genetics Study**

We enrolled patients with a diagnosis of stroke admitted to the stroke unit of the University Hospitals Leuven (Belgium) in the Leuven Stroke Genetics Study (LSGS) between 2013 and 2017. All participants from the LSGS study underwent brain imaging and full diagnostic workup including extra- and intracranial vessel imaging and cardiac examination (echocardiography and ambulatory ECG monitoring) in all patients. Based on clinical presentation and results from the diagnostic work-up, cases were classified into ischemic stroke etiologic subtypes. In this study only patients presenting with a lacunar infarct on diffusion weighted imaging were included.

### **Massachusetts General Hospital (MGH)**

Massachusetts General Hospital enrolls subjects as part of a single-center prospective cohort study of patients with ischemic stroke aged  $\geq 18$  years admitted to the Massachusetts General Hospital Stroke Unit (Boston, MA, U.S.A.) after presenting to the emergency department within 24 hours of symptom onset. Ischemic stroke is defined as a clinical syndrome of any duration associated with a radiographically proven acute infarct consistent with a vascular pattern of involvement and without radiographic evidence of a demyelinating or neoplastic disease or other structural disease, including vasculitis, subacute bacterial endocarditis, vasospasm due to subarachnoid hemorrhage or cocaine abuse, or primary intracerebral hemorrhage. Subjects included in the present study were recruited under the Genes Affecting Stroke Risk and Outcomes Study (GASROS) from 2000-2011, and under the Biorepository for Neurologic Injury between 2012 and 2017. Diagnosis of acute cerebral ischemia was confirmed for all subjects in this study using MRI completed within 48 hours of symptom onset. Expert reviewers subtyped ischemic strokes by systematic medical record review using the TOAST and CCS systems. Small artery occlusion stroke cases included in the present study were not previously genotyped or included under the NINDS-Stroke Genetics Network (SiGN) publication.

### **South London Ethnicity and Stroke Study (SLESS)**

The South London Ethnicity and Stroke Study (SLESS) is a prospective study begun in 1999 that has recruited consecutive black patients with stroke from a contiguous catchment area covered by 3 hospitals in South London (Guy's and St Thomas' Hospitals, King's College Hospital, and St George's Hospital). Ethnicity was defined according to the UK Census 2001 definition and classified as Black African or Black Caribbean. Recruitment of black controls was done by random selection from General

Practice lists in the catchment areas of St George's, Guys and St Thomas, and King's College Hospital between 1999 and 2012. Potential controls were selected from age and gender strata matched to stroke cases. Furthermore controls were identified within St George's University of London and St George's Hospital staff and contacted via email. Additionally, posters inviting healthy Black African and Black Caribbean individuals were displayed in local leisure centres, General Practice surgeries, churches and communities centres within the same catchment area as that of the cases. The study was reviewed and approved by the Wandsworth Local Research Ethics Committee, and informed consent was obtained from all participants. One consultant neurologist performed stroke subtyping using data collected on a standard proforma with additional review of all original brain imaging in all patients, as well as review of original notes when necessary. The pathophysiological Trial of Org 10172 in Acute Stroke Treatment (TOAST) subtyping classification was used for subtyping of ischemic stroke. Stroke ascertainment in SLESS: One consultant neurologist performed stroke subtyping using data collected on a standard proforma with additional review of all original brain imaging in all patients, as well as review of original notes when necessary. The pathophysiological Trial of Org 10172 in Acute Stroke Treatment (TOAST) subtyping classification was used for subtyping of ischemic stroke.

### **Understanding Society**

The United Kingdom Household Longitudinal Study (UKHLS), also known as Understanding Society (<https://www.understandingsociety.ac.uk>) is a longitudinal panel survey of 40,000 UK households (England, Scotland, Wales and Northern Ireland) representative of the UK population. Participants are surveyed annually since 2009 and contribute information relating to their socioeconomic circumstances, attitudes, and behaviours via a computer assisted interview. The study includes phenotypical data for a representative sample of participants for a wide range of social and economic indicators as well as a biological sample collection encompassing biometric, physiological, biochemical, and haematological measurements and self-reported medical history and medication use. The United Kingdom Household Longitudinal Study has been approved by the University of Essex Ethics Committee and informed consent was obtained from every participant. For a subset of individuals who took part in a nurse health assessment, blood samples were taken and genomic DNA extracted. Of these, 10,484 samples were genotyped at the Wellcome Trust Sanger Institute using the Illumina Infinium HumanCoreExome-12 v1.0BeadChip.

### **UK Biobank**

UK Biobank is a long-term study of 500,000 UK participants aged 40-69 years at recruitment covering genetic, lifestyle and health outcome data (PMID: 25826379). In this analysis, South Asian samples from UK Biobank were used as controls for analysis of South Asian lacunar stroke patients. Samples were matched based on principal components analysis.

### **Wellcome Trust Case-Control Consortium 2 (WTCCC2)**

The WTCCC2 samples were genotyped as part of the WTCCC 2 ischemic stroke study. Stroke cases were recruited from three centres in the UK (St. George's University London, Oxford and Edinburgh) and one centre in Germany, University and Klinikum Großhadern, Ludwig-Maximilians-University, Munich.

WTCCC2-UK: The St George's Stroke Study consecutively recruited ischemic stroke patients attending cerebrovascular services in London between 1995 and 2008. All patients had clinically relevant diagnostic workup performed, including brain imaging with computed tomography (CT) and/or magnetic resonance imaging (MRI) as well as ancillary diagnostic investigations including duplex ultrasonography of the carotid and vertebral arteries, echocardiography, Holter monitoring, magnetic resonance angiography (MRA), CT-angiography (CTA) and blood tests. The Oxford Vascular Study recruited patients with acute ischemic stroke or transient ischemic attack (TIA) with evidence of infarction on brain imaging between 2002 and 2008 as part of a population-based study. All cases were phenotyped by one experienced stroke neurologist with review of original imaging. The Edinburgh Stroke Study prospectively recruited consecutive stroke inpatients and outpatients between 2002 and 2005. An experienced stroke physician assessed each patient as soon as possible after the stroke, prospectively recording demographic and clinical details, including vascular risk factors and results of brain imaging and other investigations

WTCCC2-Germany: The Munich study recruited consecutively between 2002 and 2008, from a single Stroke Unit with a high rate of MR imaging (>80%) (n=1383). All subjects were over 18 years of age, of self-reported European ancestry and with a diagnosis of ischemic stroke classified according to TOAST by an experienced neurologist or stroke physician. All patients had brain imaging as well as ancillary diagnostic investigations where clinically relevant.

Controls for the UK samples were drawn from shared WTCCC controls obtained from the 1958 Birth Cohort. This is a prospectively collected cohort of individuals born in 1958 (<http://www.b58cgene.sgul.ac.uk/>), and ascertained as part of the national child development study (<http://www.cls.ioe.ac.uk/studies.asp?section=000100020003>). Data from this cohort are available as a common control set for a number of genetic and epidemiological studies. For the German samples controls were Caucasians of German origin participating into the population KORAgene study ([www.gsf.de/kora/en/english.html](http://www.gsf.de/kora/en/english.html)). This survey represents a gender- and age stratified random sample of all German residents of the Augsburg area and consists of individuals 25 to 74 years of age, with about 300 subjects for each 10-year increment. All controls were free of a history of stroke or transient ischemic attack.

### **Besta Stroke Study (Milano)**

This study includes consecutive Italian patients referred to Besta Institute from 2000 to 2009 with stroke and included in the Besta Cerebrovascular Diseases Registry (CEDIR). Ischemic stroke cases, first ever or recurrent, confirmed on brain imaging, were selected for this study. An experienced stroke neurologist assessed all cases.

### **deCODE study**

The 628 Icelandic cases with lacunar stroke were identified from a registry of individuals diagnosed with ischemic stroke or TIA at Landspítali University Hospital in Reykjavik, the only tertiary referral centre in Iceland, during the years 1993 to 2014. The ischemic stroke or TIA diagnoses were based on standard WHO criteria and imaging



evidence (either CT or MRI), and were clinically confirmed by neurologists. Eligible patients who survived the stroke were invited to participate the genetic study, either by attending a recruitment centre for deCODE's genetic studies, or they were visited at their home by a study nurse. Patients were classified into causative subtypes according to the Trial of Org 10172 in Acute Stroke Treatment (TOAST). The study is based on whole-genome sequencing of 27,633 Icelanders and Illumina SNP chip genotyping of 155,250 Icelanders. Genotypes for the chip-typed individuals are phased using the method of long-range phasing (Kong et al. Detection of sharing by descent, long-range phasing and haplotype imputation *Nat Genet* 40, 1068-75, 2008) and genotype probabilities for un-typed variants are imputed into the chip-typed individuals, and their close relatives, using phased genotypes for the 27,633 WGS individuals as reference. Association testing for case-control analysis was performed using logistic regression, adjusting for age, gender and county of origin and assuming a multiplicative model of risk. About 45 million variants, all with imputation info over 0.8, were tested for association. To account for inflation in the test statistics due to cryptic relatedness and stratification within the case and control sample sets, we applied the method of LD score regression (Bulik-Sullivan B. K. et al. LD Score regression distinguishes confounding from polygenicity in genome-wide association studies. *Nat. Genet.* 47, 291–295, 2015). Control comprised 254,176 individuals recruited through different genetic projects at deCODE. Individuals with confirmed stroke (identified by cross-matching with hospital lists) were excluded as controls. The study was approved by the Data Protection Commission of Iceland and the National Bioethics Committee of Iceland. All participants gave informed consent.

### **Dutch Parelsnoer initiative (PSI)**

We included Dutch patients with the subtype small vessel disease of ischemic stroke who were enrolled in the Dutch Parelsnoer initiative (PSI) Cerebrovascular Disease (1). This study represents a collaboration of eight university medical centers in the Netherlands in which clinical data, imaging and biomaterials of patients with stroke are prospectively and uniformly collected (1). The present study includes patients enrolled between September 2009 and November 2014. Ischemic stroke was defined as focal neurologic deficits of sudden onset originating from the brain and persisting for more than 24 hours, in the absence of hemorrhage as confirmed by imaging. The subtype small vessel disease was determined according to the Trial of Org 10172 in Acute Stroke Treatment (TOAST) (2). Information on ancestry in patients was obtained by self-report. The Medical Ethics Committee of the different university medical centers in the Netherlands approved the study and all patients provided written informed consent.

1. Nederkoorn PJ, et al. The Dutch String-of-Pearls Stroke Study: Protocol of a large prospective multicenter genetic cohort study. *Int. J. Stroke.* 2015;10:120–122.
2. Adams H, et al. (TOAST) Classification of Subtype of Acute Ischemic Stroke. *Stroke.* 1993;23:35–41.

### **Barcelona**

Stroke patients were recruited in Vall d'Hebron Hospital and Sant Pau Hospital (Barcelona, Spain). The patients were recruited if they had a stroke diagnosis performed by an experienced neurologist at each center and confirmed by neuroimaging, were older than 18 years of age. Etiologic subgroups were classified following TOAST criteria. Controls were subjects without a history of ischemic stroke, older than 18, who declared they were free of neurovascular diseases by direct interview before recruitment. The

control cohort was collected in primary care centers from Barcelona city and in hospitals throughout Spanish territory as a part of the GRECOS project (Fernandez-Cadenas et al Stroke 2017). All participants were genotyped with the Illumina® Human Core Exome chip.

## **SAHLSIS**

SAHLSIS is a case-control study of ischemic stroke based in Gothenburg, Sweden. Adult subjects who presented with first-ever or recurrent acute ischemic stroke before 70 years of age were recruited consecutively at stroke units in western Sweden from 1998 to 2012. All participants were of European origin. Patients were not excluded based on stroke severity or whether they were enrolled in a treatment trial. All participants underwent ECG and neuroimaging at the acute stage (all by CT and 58% also by MRI). Additional diagnostic work-up was performed when clinically indicated. Inclusion criteria was ischemic stroke which was defined as an episode of focal neurological deficits with acute onset and lasting > 24 hours or until death, with no apparent non-vascular cause, and no signs of primary hemorrhage on brain imaging. Subjects were excluded if they had a diagnosis of cancer at advanced stage, infectious hepatitis or human immunodeficiency virus. Ischemic stroke was assigned according to modified TOAST criteria.

## **Helsinki Ischemic Stroke Genetics Study**

Helsinki Ischemic Stroke Genetics Study was designed for investigating genetic factors underlying ischemic stroke in the Finnish population and in the long-term to be incorporated to multicenter multinational similar datasets. Ischemic stroke cases were recruited from 2012 to 2017 from the Helsinki University Hospital, Department of Neurology which is the only neurological emergency unit for a population of 1.7 million inhabitants. 1848 patients with positive neuroimaging findings for a new-onset brain infarction were included. All cases are of white, Caucasian origin. Stroke subtyping was performed according to the Trial of Org 10172 in Acute Stroke Treatment (TOAST) classification. 3560 control samples were obtained from the national FINRISK study 1992, 1997, 2002, 2007 and 2012 cohorts (Salomaa 2016 PMID: 27242092). Only participants residing in the same geographic area (Greater Helsinki region) and without history of ischemic or hemorrhagic stroke based on the National Hospital Discharge Register and the National Causes-of-Death Register (ICD-10 codes I61, I63.0-I63.5, I63.7-I63.9, I64 or respective in the earlier ICD versions) were included as controls. Cases and controls have provided a blood sample for the genetic analyses and have been genotyped on the Illumina HumanCoreExome or Illumina Global Screening array. The Helsinki Ischemic Stroke Genetics study and FINRISK study have been approved by the Ethics Committee of Medicine, Helsinki University Hospital and the Coordinating Ethics Committee of Helsinki University Hospital, respectively. All the participants have signed an informed consent.

## **MyCode Community Health Initiative (MyCode)**

Geisinger MyCode Community Health Initiative (MyCode®) is a system-wide biorepository with more than >260,000 participants enrolled to date. Participants are consented to use their deidentified genetic and electronic health record (EHR) data for research purposes. Genotyping was performed in batches on the Illumina Infinium OmniExpress

Exome array and GSA-24v1-0 array and were imputed to HRC.r1-1 EUR reference genome (GRCh37 build) separately using the Michigan Imputation Server. Centralized data included the overlapped variants from the imputation and variants should have an info score  $\geq 0.7$ .

Carey DJ, Fetterolf SN, Davis FD, et al. The Geisinger MyCode community health initiative: an electronic health record-linked biobank for precision medicine research. *Genet Med.* 2016;18(9):906-913.

Dewey FE, Murray MF, Overton JD, et al. Distribution and clinical impact of functional variants in 50,726 whole-exome sequences from the DiscovEHRstudy. *Science.* 2016;354(6319).

## **NINDS-SIGN consortium**

### **Cases**

BASEde datos de ICTus del hospital del MAR (BASICMAR)

BASICMAR is an ongoing prospective study of all acute strokes assessed since 2005 at the IMIM-Hospital Universitari del Mar (Barcelona, Spain). It includes both first-ever and recurrent strokes. There were no exclusion criteria regarding age or race-ethnicity of the individuals. All patients had an electrocardiogram (ECG), a blood analysis, and neuroimaging at the acute stage. Additional diagnostic procedures were performed when clinically indicated. A follow-up of three months after stroke was completed for all survivors. Ischemic stroke etiologic subtypes were classified according to TOAST criteria. For this study, only individuals of European origin with ischemic stroke were selected from BASICMAR, with eligible events defined as a clinical syndrome of any duration associated with a radiographically proven acute infarct, without radiographic evidence of a demyelinating or neoplastic disease or other structural disease including primary intracerebral hemorrhage.

### **GCKSS**

The GCKSS is a population-based epidemiologic study of stroke in blacks and whites that is designed to measure temporal trends and racial differences in incidence of stroke. The catchment area includes two southwestern Ohio, U.S.A., counties (Hamilton, which includes the city of Cincinnati, and Clermont to the east) and three Northern Kentucky, U.S.A., counties (Boone, Kenton, and Campbell) to the south of Cincinnati across the Ohio River. As part of the GCKSS, for calendar years 1999 and 2005, prospective cohorts of first-ever and recurrent ischemic stroke cases were assembled using “hot pursuit” methodology at all local hospitals in the region (18 in 1999, and 17 in 2005), except for one hospital that is solely devoted to treating pediatric cases. Participants remained eligible if they were in a treatment trial, but participation in a treatment trial was not required for enrollment. Subjects with all degrees of severity of stroke were eligible, and no particular racial group was intentionally oversampled (about 80% were white participants and 20% black). Study research nurses prospectively screened inpatient admission and emergency department logs to identify acute ischemic stroke

patients. When a case was identified and the treating physician had given permission to approach the patient, a study nurse asked the subject or a proxy (the most closely related competent individual, preferably a person living with the subject prior to the stroke) to consent to participate in the cohort. After consent was granted, a study nurse performed an extensive interview, and a blood sample was obtained for genetic analysis. In addition, a study nurse abstracted information about the individual, the subject's medical history, the stroke event, and imaging studies from the hospital chart. A study physician reviewed every abstract, along with the imaging studies, to verify that an acute stroke had occurred, and to classify the event according to TOAST and CCS criteria.

#### Graz

Between 1994 and 2003, subjects with first-ever and recurrent ischemic strokes admitted to the stroke unit of the Department of Neurology, Medical University of Graz (Graz, Austria) were included. All race-ethnic groups were eligible and there was no intentional oversampling. All age groups were allowed, though only subjects above the age of 18 were admitted to our department. Ischemic stroke was defined as an episode of focal neurological deficits with acute onset and lasting > 24 hours. There were no selection criteria based on stroke severity. Those individuals in treatment trials were excluded. 685 subjects were eligible to participate in this study (278 women, 407 men). All cases were Caucasian. Mean age was  $68.9 \pm 13.8$  years with an age range from 19–101 years. In addition to a standardized protocol including a laboratory examination and carotid ultrasound or magnetic resonance angiography and ECG, 304 subjects underwent neuroimaging by CT and 381 by MRI. More extensive cardiac examination, including transesophageal echocardiography or transthoracic echocardiography and Holter, was performed in subjects with suspected cardiac embolism. Stroke subtypes were assessed according to modified TOAST criteria and were conducted by trained stroke neurologists.

#### Krakow

All consecutive subjects with ischemic stroke (fulfilling WHO criteria<sup>12(3)</sup>) who were admitted to the Stroke Unit at the Jagiellonian University (Krakow, Poland) and who provided informed consent were included in the study. The Stroke Unit serves as a stroke emergency center for one district of Krakow, Poland (200,000 inhabitants) and as a referral center for South East Poland (up to 15% of all admissions). For this on-going, prospective single-center, hospital-based study participants with first ever or recurrent strokes were recruited from January 22, 2002 to September 9, 2010. The local research ethics committee approved the study. Participants in treatment trials were excluded. All subjects were of European origin. Stroke severity was not a criterion for inclusion or exclusion. All cases had performed clinically relevant diagnostic workup, including brain imaging with CT (100%) and/or MRI (up to 20%) as well as ancillary diagnostic investigations including duplex ultrasonography of the carotid and vertebral arteries (approximately 90%), and transthoracic echocardiography (approximately 70%). Magnetic resonance angiography (MRA), computed tomographic angiography (CTA), and ambulatory ECG monitoring, transesophageal echocardiography and blood tests for hypercoagulability were performed. Stroke cases were classified into etiologic subtypes according to TOAST. All cases were phenotyped independently by two experienced stroke neurologists with review of original imaging. Cases were subsequently classified additionally using the CCS system.

### Leuven Stroke Genetics Study (LSGS)

Cases of European descent with cerebral ischemia, defined as a clinical stroke with imaging confirmation or a TIA with a new ischemic lesion on diffusion-weighted imaging, who were admitted to the Stroke Unit of the University Hospitals (Leuven, Belgium) were enrolled in the LSGS between 2005 and 2009. All participants from the LSGS study underwent brain imaging (MRI in 91% of patients, CT in the remainder) and a standardized protocol including lab examination, carotid ultrasound or CTA and cardiac examination (echocardiography and ambulatory ECG monitoring) in all patients. Based on clinical presentation and results from the diagnostic work-up, cases were classified into ischemic stroke etiologic subtypes according to modified TOAST criteria by a single reviewer. The reviewer had access to all information and imaging. Large-vessel disease was defined as either occlusive or significant stenosis (corresponding to > 50% luminal diameter reduction according to North American Symptomatic Carotid Endarterectomy Trial (NASCET) criteria<sup>13</sup> of a clinically relevant pre-cerebral or cerebral artery, presumably due to atherosclerosis. Carotid ultrasound was used as a screening tool, and in principle, additional imaging with CTA or MRA was performed when a high-grade stenosis was identified. In case CTA was used as the primary imaging modality, stenosis was confirmed by carotid ultrasound. In case of posterior circulation infarcts on imaging, CTA or MRA was used as the primary imaging modality to determine the degree of stenosis. Probable causes of cardiac embolism were excluded. The presence of a patent foramen ovale was not considered a cardiac source in this context. Intracranial atherosclerosis was considered present only if repeat imaging after at least one week revealed a similar degree of stenosis or persistent occlusion. If not, the findings were interpreted as an embolism from a proximal source. Small-vessel disease was defined as a symptomatic infarct of < 20 mm on DWI in areas supplied by single, small penetrating branches from middle cerebral artery, posterior cerebral artery or basilar artery in the absence of both a cardioembolic source and significant stenosis/occlusion due to atherosclerosis of an appropriate major brain artery. Cardioembolic stroke was defined as ischemic stroke in the presence of atrial fibrillation, sick sinus syndrome, myocardial infarction in the past four weeks, cardiac thrombus, infective endocarditis, atrial myxoma, prosthetic mitral or aortic valve, valvular vegetations, left ventricular akinetic segment, dilated cardiomyopathy, or patent foramen ovale or atrial septal aneurysm. Significant stenosis/occlusion due to atherosclerosis of an appropriate pre-cerebral or cerebral artery should be excluded. Other determined cause of stroke included those with arterial dissection, vasculitis, hematologic disorders, monogenic syndromes and complications of cardiovascular procedures. Dissection was diagnosed by typical findings on contrast-enhanced MRA and T1-fat suppressed MRI. Cryptogenic stroke was defined when no cause was identified despite an extensive evaluation. Strokes associated with significant aortic arch atheroma with plaques of  $\geq 4$  mm were also considered cryptogenic strokes. In addition to this primary classification, cases were reclassified using CCS.

### Lund Stroke Register (LSR)

The LSR is an ongoing study including consecutive subjects with first-ever stroke since March 1, 2001 from the local uptake area of Skåne University Hospital, Lund (Sweden). Stroke was defined using the WHO criteria. Subjects aged 18 years or older with stroke caused by cerebral infarct, intracerebral hemorrhage or subarachnoid hemorrhage are included. Cases are included regardless of stroke severity, race-ethnic group belonging, or participation in any treatment trial. Those with iatrogenic or

traumatic stroke are excluded. In the discovery phase of the SiGN study, subjects from LSR with first-ever ischemic stroke between March 1, 2001 and February 28, 2010 were included if they or their next of kin provided informed consent. Age over 90 years was set to 90 years to maintain anonymity. Every participant underwent CT, MRI, or autopsy of the brain; and ECG. Echocardiography, ultrasound, CTA or MRA of cerebral arteries was performed when judged clinically relevant. The subtype of ischemic stroke was determined using CCS. For the secondary phase of SiGN, LSR individuals not included in the SiGN discovery phase participated after genotyping in the South Swedish genome-wide association study as follows: first ever ischemic stroke cases recruited in 2006 and 2010 to 2012, and age-and sex-matched LSR control subjects without stroke recruited in 2001 to 2002 and 2006 to 2007 from the same geographical area with use of the official Swedish population register.

#### Middlesex County Ischemic Stroke Study (MCISS)

The MCISS was initiated as a prospective hospital based stroke registry at the New Jersey Neuroscience Institute (Edison, NJ, U.S.A.). All cases over age 18 years were included, and no specific ethnic/racial group was targeted or excluded. From 2000 to 2009, 1,139 subjects with ischemic strokes were enrolled in this registry. There was no selection criterion based upon stroke severity, and both first-ever and recurrent strokes were included. Cases that were participants in treatment trials were not excluded. The major race/ethnic groups are Whites (67.2%), African Americans (14.3%), Asian Indians (8.2%), Hispanic (5.5%) and others (4.8%, Chinese and other Asians). All subjects with clinical suspicion of a stroke were admitted through the emergency room to a dedicated stroke unit supervised by a vascular neurologist. After a history and neurological examination, a standardized series of investigations were performed: complete blood count and differential, comprehensive metabolic panel, electrolytes, blood urea nitrogen, creatinine, lipid panel (total cholesterol, low-density lipoprotein, high-density lipoprotein, triglyceride levels, homocysteine levels, a cerebral MRI/MRA (if the MRI could not be performed, a head CT scan was done), carotid duplex ultrasound, ECG and an echocardiogram. The diagnosis of cerebral infarct was confirmed by the imaging studies. The epidemiological and clinical data on these participants was collected prospectively. Two independent investigators (one of which was a board-certified neurologist with expertise in vascular neurology) reviewed the data, and all strokes were classified into etiological subtypes using TOAST criteria. In addition, the Oxfordshire stroke classification<sup>14</sup> was applied, and the vascular distribution of stroke was tabulated. All procedures, including the generation of the databases and recruitment of the stroke subjects, were conducted following Institutional Review Board policies and procedures at the New Jersey Neuroscience Institute/JFK Hospital.

#### Miami Stroke Registry and Biorepository (MIAMISR)

The MIAMISR at the University of Miami/Jackson Memorial Hospital (Miami, FL, U.S.A.) is an ongoing prospective hospital registry of consecutive patients subjects with prevalent stroke (ischemic and hemorrhagic) and TIA with available neuroimaging (CT or MRI) who provide informed consent. There are no specific exclusion criteria with the respect to age, stroke severity, disability or participation in treatment trials. It was established in November of 2008 in order to investigate stroke type, ischemic stroke subtypes, stroke genetics and stroke outcomes in diverse ethnic population of Miami. The stroke population is predominately Hispanic (63%), with Cuba (32%), Nicaragua (4.8%), Colombia (4.8%), and Puerto Rico (4.1%) contributing the most subjects. Jackson Memorial Hospital is a 1,550-bed county hospital affiliated with the University of

Miami with approximately 900 stroke and TIA admissions per year. Demographic and clinical data along with blood samples for genetic and other research have been collected prospectively during the hospitalizations. Follow-up information was obtained at 90 days by telephone interview or in person. Trained research staff obtained written informed consent from the stroke patients or the health care proxy when available for participation in MIAMISR.

#### Nurses' Healthy Study (NHS)

The NHS cohort consists of 121,700 female registered nurses aged 30–55 years who were residing in 11 U.S. states and who were enrolled in 1976 through responding to a mailed questionnaire on their medical history and lifestyle practices. They have been followed with biennial mailed questionnaires collecting information on disease risk factors and health status. From 1989–1990, blood samples were collected from 32,826 participants. Among these participants, we prospectively identified incident strokes and confirmed ischemic stroke cases by medical record review. Clinical symptoms consistent with stroke and exclusion of alternate etiologies were required for classification of stroke. Virtually all cases had imaging, but confirmation on CT or MRI was not required. No participants were excluded based on race/ethnicity. Neither stroke severity nor enrollment in a treatment trial was part of the eligibility criteria.

#### Northern Manhattan Study (NOMAS)

NOMAS is an ongoing population-based study designed to determine stroke incidence, risk factors and outcome in an urban multiethnic population.<sup>16</sup> NOMAS started in 1993 as a case-control study of index ischemic stroke cases admitted to the Columbia University Presbyterian Medical Center (New York, NY, U.S.A.) and affiliated hospitals and matching community controls (Northern Manhattan Stroke Study, NOMASS) and continued as a prospective stroke incidence study by following up controls in 1997 (NOMAS). Demographic and clinical data were collected prospectively during the hospitalizations and annually by phone or in person. Genetic samples were derived from two sources: (a) the population-based case-control study conducted from 1993-98 (NOMASS) and (b) the ongoing prospective cohort study (NOMAS). First-ever ischemic stroke cases were identified for the case-control study by screening of patient admissions, discharge codes, and referrals for neuroimaging at 15 acute care hospitals in the defined study area and multiple approaches to monitor for non-hospitalized cases. Incident ischemic stroke cases were identified from the prospective cohort study through follow-up visits and scheduled telephone contacts. Ischemic stroke cases from both sources were followed at 6 months by telephone and then annually afterwards in order to assess functional status and other outcomes. The administrative coordinating center of NOMAS moved from New York to Miami in 2007. The Institutional Review Boards of both institutions, Columbia University and the University of Miami (Miami, FL, U.S.A.), approved the study.

#### Reasons for Geographic and Racial Differences in Stroke (REGARDS)

The REGARDS study is a U.S. national, population-based, longitudinal cohort of 30,239 African American and white adults aged  $\geq 45$  years, recruited January 2003 to October 2007 with ongoing follow-up. Suspected stroke is queried every six months and triggered by participant self-report of stroke, stroke symptom(s), hospitalization, or

proxy report of death. Stroke severity and participation in a treatment trial did not limit inclusion in this study. Medical records for these reported events are retrieved and reviewed by at least two members of a committee of stroke experts with disagreements resolved by a third adjudicator. A symptom-based approach, independent of neuroimaging outcome, is used to confirm events using the WHO definition of stroke. An infarct did not need to be seen on brain imaging to be included in this study. Ischemic stroke subtype classification is conducted using the TOAST system.

#### Secondary Prevention of Small Subcortical Strokes (SPS3)

The SPS3 trial (NCT00059306) is a randomized, multicenter, Phase 3 trial of antiplatelet therapy and antihypertensive therapy. Participants are randomized to aspirin alone or the combination of aspirin and clopidogrel. Participants are also randomized to two groups of blood pressure control: either to a target systolic blood pressure of 130–149 mm Hg or < 130 mm Hg. Principal eligibility criteria include man or woman at least 30 years of age with clinical evidence of small subcortical stroke and brain MRI evidence of small subcortical infarct. Subjects were required to not have evidence of ipsilateral symptomatic cervical carotid stenosis or high-risk cardioembolic sources for embolism. Further details of eligibility criteria have been published. Primary outcomes include ischemic and hemorrhagic stroke. DNA samples were collected from 38% (1,139/3,020) of participants in the trial. These samples were obtained from 46% (37/81) participating centers across the U.S., Canada, Spain, Mexico, Chile, Ecuador and Peru. No additional eligibility criteria were necessary beyond informed consent for participating in the DNA sub-study. A total of 0.9% (10/1,139) of DNA donors gave sample at time of randomization, with the remainder donating at a later time point in follow-up.

#### Washington University St. Louis (WUSTL) Study

The WUSTL patient collection included ischemic stroke cases admitted to Barnes-Jewish Hospital/Washington University Medical Center (St. Louis, MO, U.S.A.) for genetic studies starting from August 1, 2008. Participants were identified for the genetic studies by screening admissions at our tertiary care hospital (both in the Emergency Department and on the Inpatient Stroke Service) without regard to age, race or ethnicity, including both first-ever and recurrent strokes. Subjects were retained in the study if their discharge diagnosis was ischemic stroke (without requirement for the stroke to be visualized on CT or MRI). Demographic and clinical data were collected prospectively during the hospitalization and at 90 days, by phone or in person. Genetic samples were derived from subjects enrolled in 3 different studies: (a) Acute tPA pharmacogenomics study (Ischemic stroke cases who received tPA and were admitted to BJH/Washington University; serial NIHSS scores, and data on hemorrhagic transformation was collected) (b) Recovery Genomics after Ischemic Stroke Study (ReGenesIS, Ischemic stroke cases with NIHSS > 3 points without underlying chronic neurological disease, and expected survival up to 3 months after stroke), and (c) the Cognitive Recovery and Rehabilitation Group (CRRG) Registry (all ischemic stroke cases admitted to BJH/Washington University who consent to entering their clinical data into a stroke registry, and the collection of blood for genetic analysis). Cases that were part of a treatment trial were excluded from the tissue plasminogen activator pharmacogenomics and ReGenesIS study, but not the CRRG registry.



## Controls

### Attention-deficit Hyperactivity Disorder (ADHD)

The Vall d'Hebron Research Institute (VHIR) cohort included 435 blood donors of Caucasian origin recruited from 2004 to 2008 at the Hospital Universitari Vall d'Hebron (Barcelona, Spain) to identify loci conferring susceptibility to Attention-Deficit Hyperactivity Disorder. Seventy-six percent of participants were male (N = 330) and the average age at assessment was 43.8 years (s.d. = 14.3). Genome-wide genotyping was performed with the Illumina HumanOmni1-Quad BeadChip platform. The study was approved by the ethics committee of the institution and informed consent was obtained from all participants in accordance with the Declaration of Helsinki.

### Health ABC (HABC)

The Health Aging and Body Composition (Health ABC) Study is a National Institute on Aging (NIA)-sponsored cohort study of the factors that contribute to incident disability and the decline in function of healthier older persons, with a particular emphasis on changes in body composition in old age. Between April 15, 1997 and June 5, 1998, the Health ABC study recruited 3,075 70–79 year old community-dwelling adults (41% African American), who initially had no indications of disability related to mobility and activities of daily living. The key components of Health ABC include a baseline exam, annual follow-up clinical exams, and phone contacts every six months to identify major health events and document functional status between clinic visits. The core yearly examination for Health ABC includes measurement of body composition by dual energy x-ray absorptiometry (DXA), walking ability, strength, an interview that includes self-report of limitations and weight, and a medication survey. At baseline, visceral adiposity was measured by computerized tomography (CT). Provision has been made for banking of blood specimens and extracted DNA (HealthABC repository). The overall goal of this project is to identify genetic determinants of visceral adiposity.

### Hispanic Community Health Study/Study of Latinos (HCHS/SOL)

The Hispanic Community Health Study/Study of Latinos (HCHS/SOL) was initiated in 2006 to investigate the prevalence and risk factors affecting several health conditions, including heart, lung and blood disorders, kidney and liver function, diabetes, cognitive function, dental conditions and hearing disorders.<sup>24,25</sup> Participants aged 18–74 self-identified as Hispanic or Latino, with substantial representation of Mexican, Puerto Rican, Dominican, Cuban, Central and South American groups. They were recruited from four field centers in the United States: San Diego, CA; the Bronx, NY; Chicago, IL; and Miami, FL. 12,803 study participants consented to genetic studies and will be included in the HCHS/SOL dbGaP posting. Genotyping of the HCHS/SOL participants was performed at Illumina Microarray Services using the SOL HCHS Custom 15041502 array (annotation version “B3”, genome build 37), which includes 2,575,443 variants (of which 2,427,090 are in common with the Illumina HumanOmni2.5 and 148,353 are custom content). Health and Retirement Study (HRS) The University of Michigan Health and Retirement Study (HRS) is a longitudinal panel study that surveys a representative sample of more than 20,000 Americans over the age of 50 every two years. Supported by the National Institute on Aging (NIA U01AG009740) and the Social Security Administration, the HRS explores the changes in labor force participation and the health transitions that individuals undergo toward the end of their work lives and in

the years that follow. Since its launch in 1992, the study has collected information about income, work, assets, pension plans, health insurance, disability, physical health and functioning, cognitive functioning, and health care expenditures. HRS is intended to be a nationally representative sample with 2:1 oversampling of minority groups including African-American and Hispanic/Latino populations. In Phases I–II, 12,507 study participants were included in the dbGaP posting. Genotyping of the HRS Phase I–II participants was performed at CIDR using the Illumina HumanOmni2.5-4v1 array (annotation version “D”, genome build 37) and released a total of 2,443,179 variants.

#### Infancia y Medio Ambiente (INMA)

The Infancia y Medio Ambiente (Environment and Childhood) project is a research project comprising a Spanish population-based birth cohort created to study the role of the environmental pollutants during pregnancy and first stages of life and their effects on childhood growth and development. The cohort was established between 2003 and 2008 from mothers enrolled in four regions within Spain and included their infants.

#### MONICA/KORA Augsburg Study

For the German MUNICH discovery samples, independent control groups were selected from Caucasians of German origin participating into the population KORAgen study. This survey represents a sex-and age stratified random sample of all German residents of the Augsburg area and consists of individuals 25–74 years of age, with about 300 subjects for each 10-year increment. All controls were free of a history of stroke or transient ischemic attack. KORA samples were genotyped on the Illumina Human 550k platform. QC was identical for all WTCCC cohorts.

#### Krakow

The control group included unrelated subjects taken from the population of southern Poland. Control subjects had no apparent neurological disease based on the findings in a structured questionnaire and a neurological examination. Local research ethics committees approved the study and informed consent was obtained from all participants.

#### Leuven Stroke Genetics Study (LSGS)

Control individuals were recruited in the same population amongst healthy individuals, spouses of patients suffering from neurological diseases (amyotrophic lateral sclerosis, ischemic stroke or multiple sclerosis), and from the Leuven University Gerontology Database as previously described.

#### Osteoarthritis Initiative (OAI)

The OAI is a publicly and privately funded prospective longitudinal cohort with a primary objective of identifying risk factors for incidence and progression of tibiofemoral knee OA. The OAI utilized a focused population-based recruitment to enrol 4,674 men and women between the ages of 45–79 years who either had radiographic

symptomatic knee OA or who were without radiographic symptomatic OA in both knees but were considered high risk for OA because they had two or more known risk factors for knee OA. Subjects were recruited into the baseline phase of the OAI at multiple sites throughout the US between 2004 and 2006. All subjects were invited back for follow-up examinations to assess incidence or progression of OA annually, for up to 5 years. Phenotype data from the baseline and follow-up examinations are available for public access from the Osteoarthritis Initiative (OAI) database. The Genetic Components of Knee Osteoarthritis (GeCKO) Study was initiated in 2009 as a genetic ancillary study to perform a genome-wide association study to identify genetic variants associated with radiographic osteoarthritis. This study included 4,482 individuals participating in the parent OAI study genotyped on the Illumina HumanOmni2.5M.

Supplementary Figures 1-2. QQ-plots of Observed against Expected  $-\log_{10}(p\text{-values})$  for European (Left) and Transethnic (Right) Genome-wide Analyses

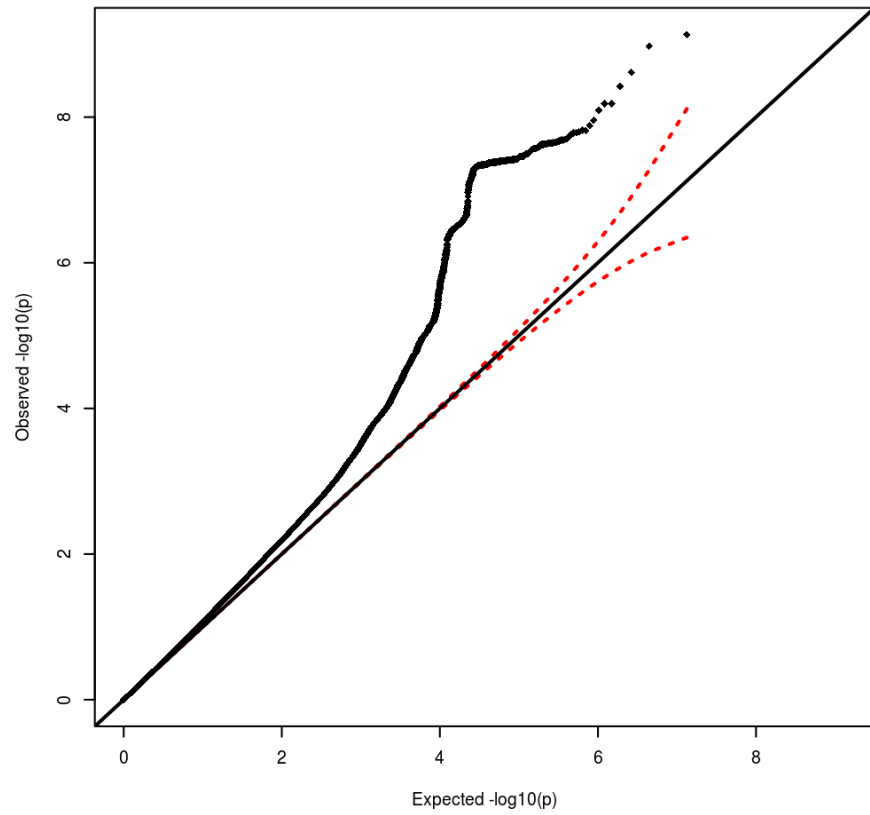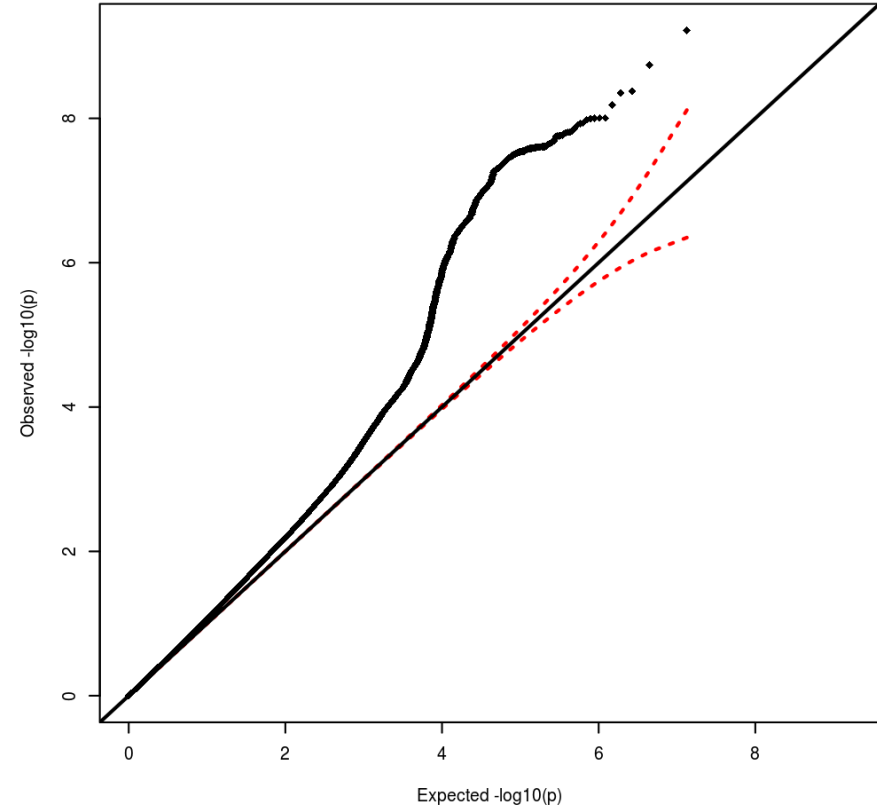

Supplementary Figure 3. SPI1-SLC39A13-PSMC3-RAPSN Region in European (left) and Transethnic (right) analysis

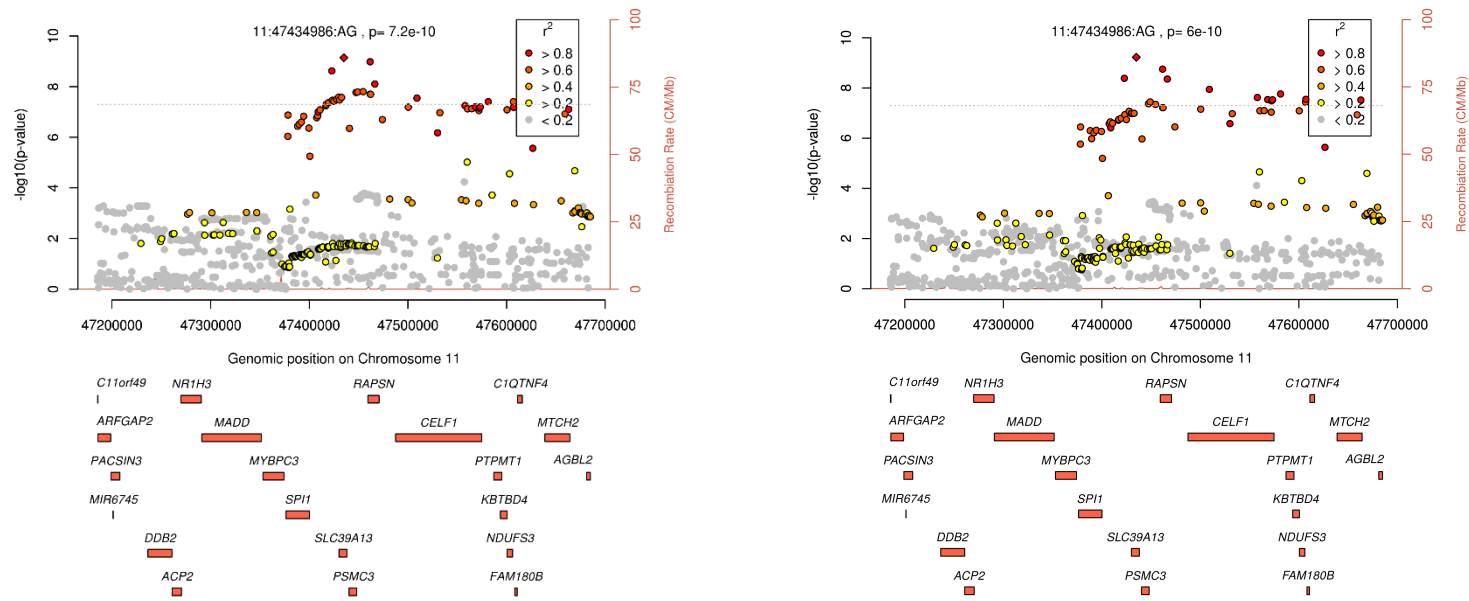

Supplementary Figure 4. ICA1L-WDR12-CARF-NBEAL1 Region in European (left) and Transethnic (right) analysis

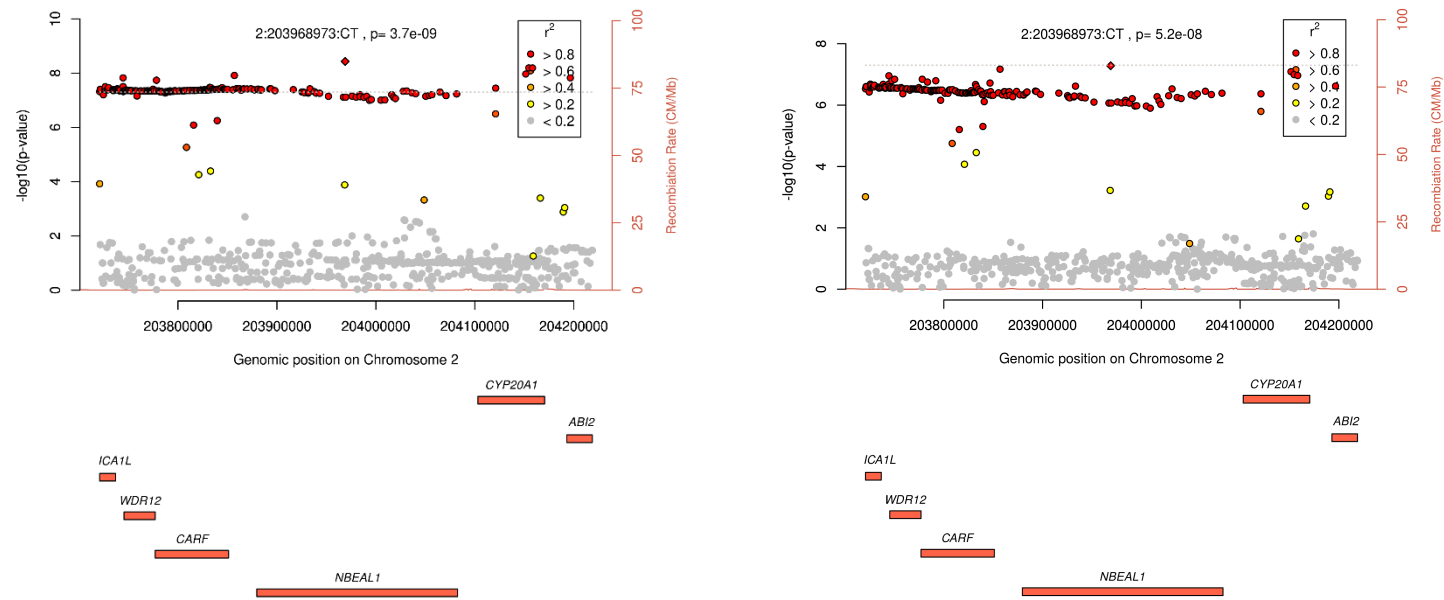

## Supplementary Figure 5. ZCCHC14 Region in European (left) and Transethnic (right) analysis

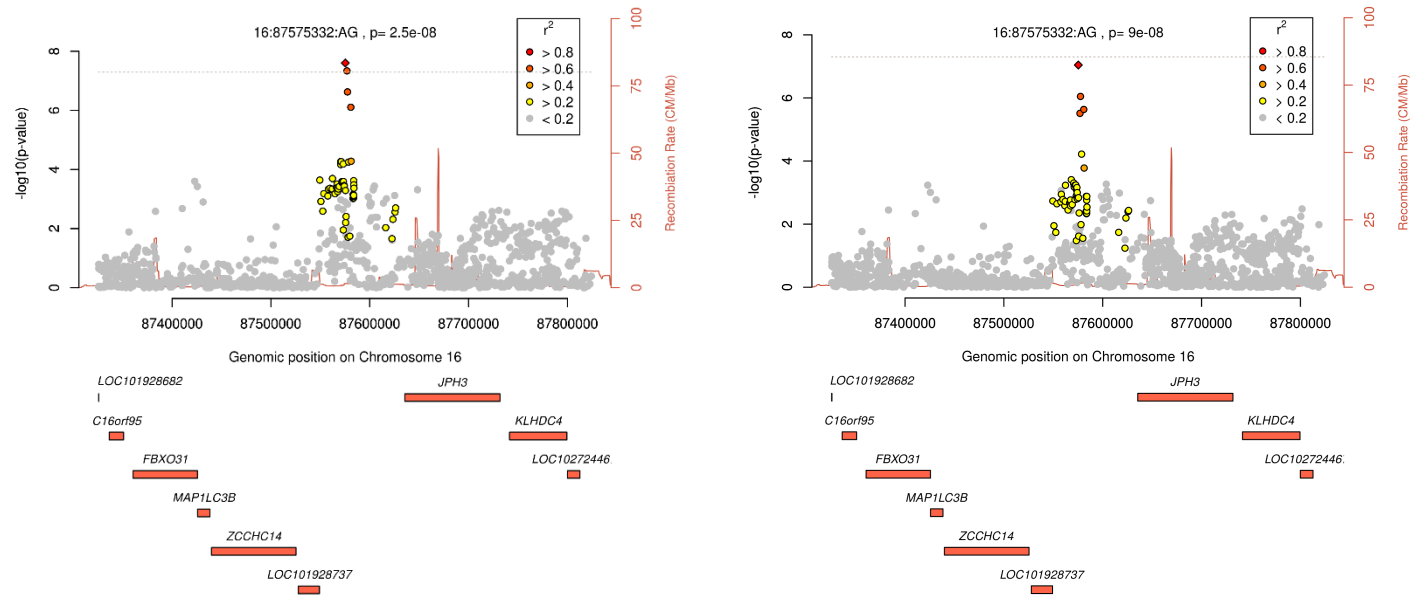

Supplementary Figure 6. ULK4 Region in European (left) and Transethnic (right) analysis

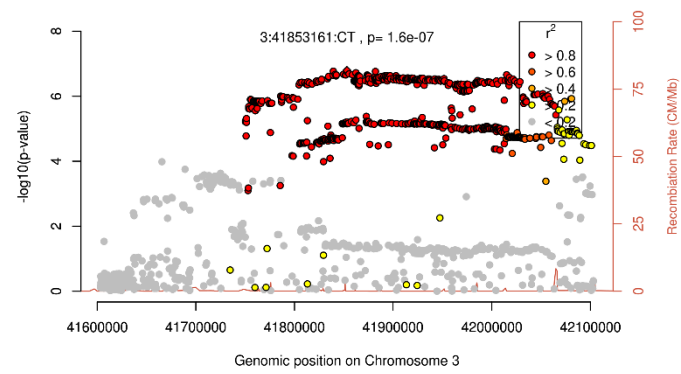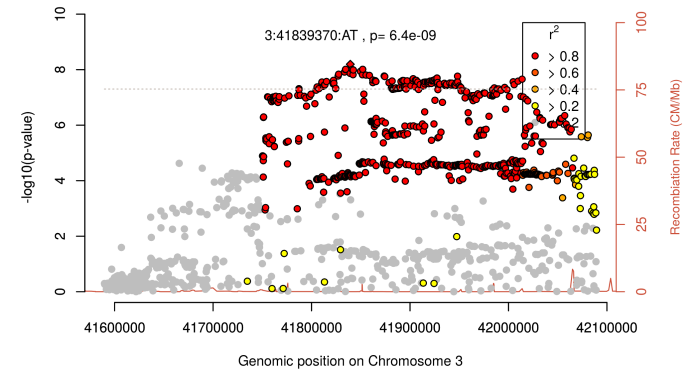



Supplementary Figure 7. ZBTB14-EPB41L3 Region in European (left) and Transethnic (right) analysis

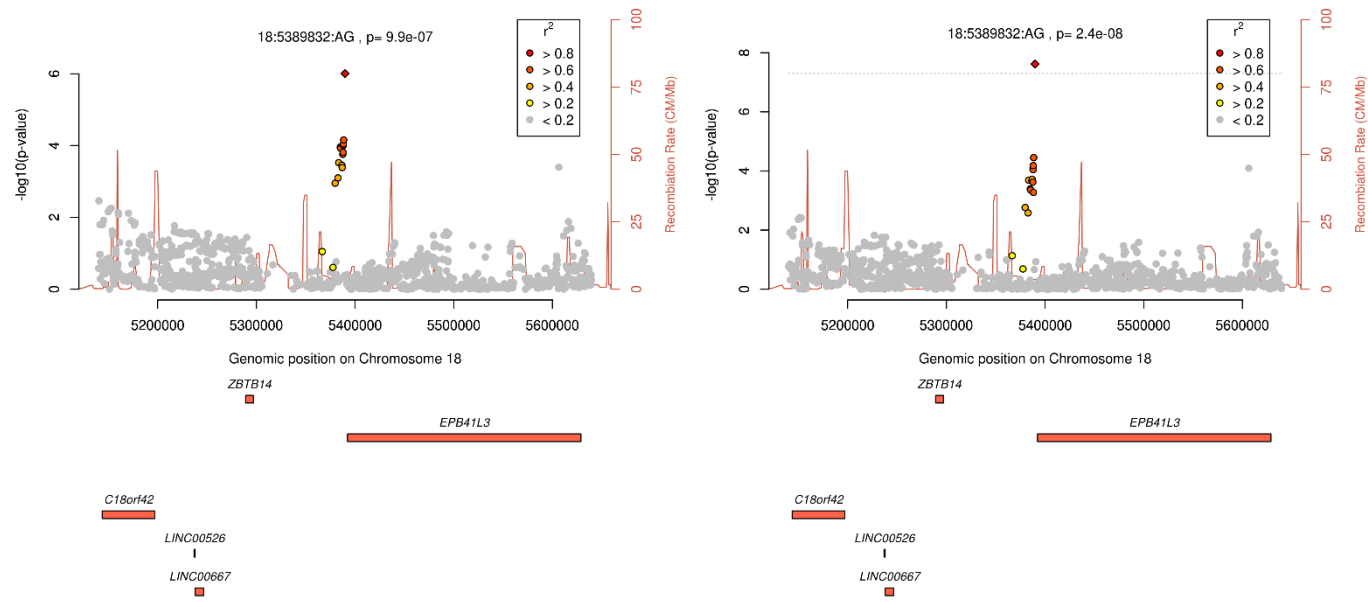

## Supplementary Figures 8-11. Regions achieving genome-wide significance in multi-trait analysis

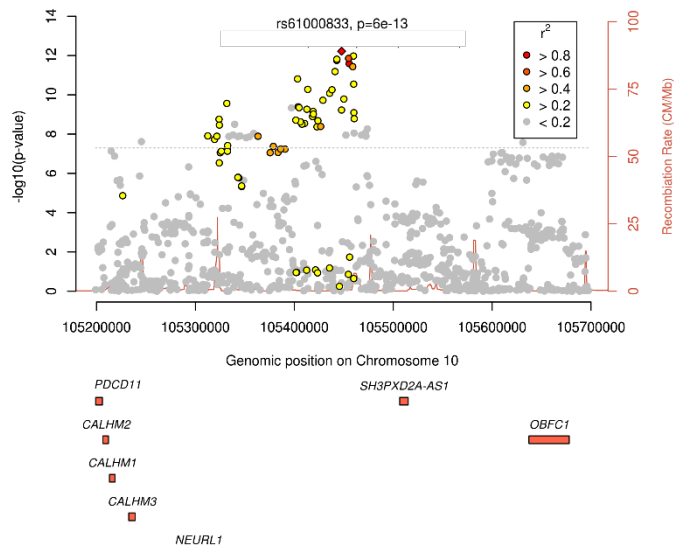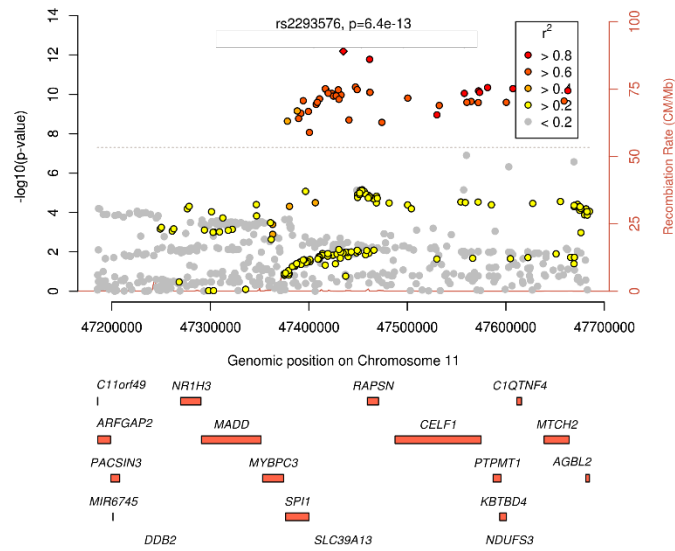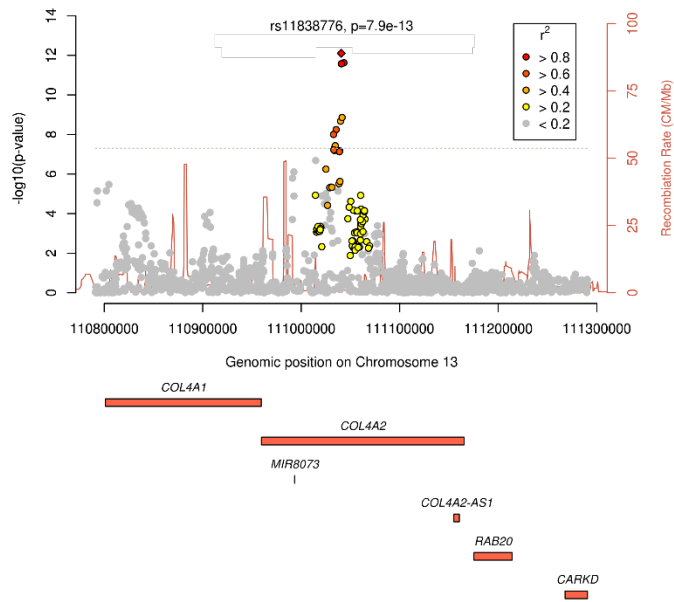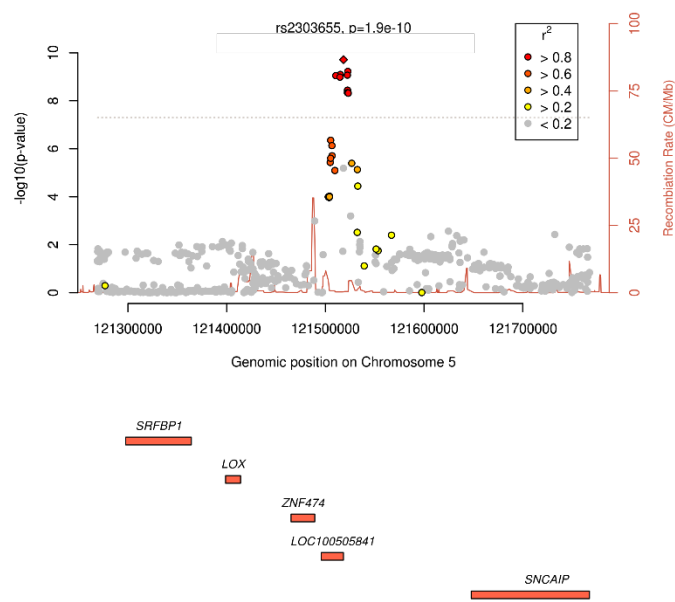

## Supplementary Figures 12-15. Regions achieving genome-wide significance in multi-trait analysis

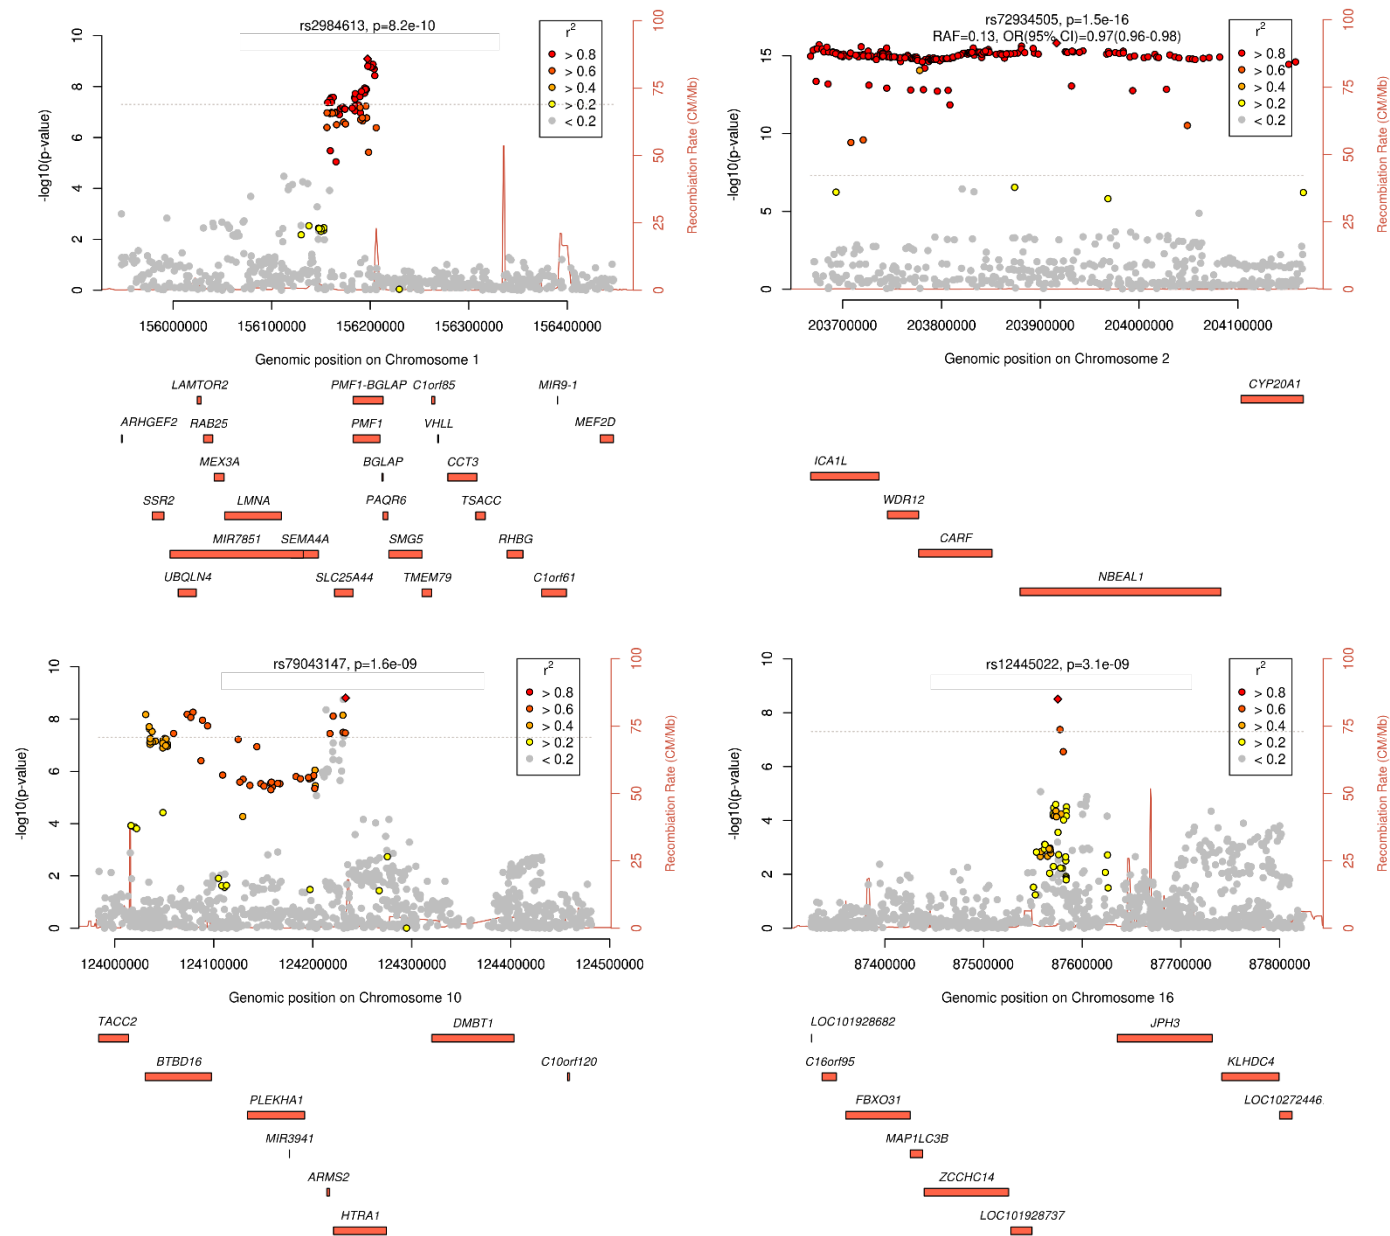

Supplementary Figures 16-17. Regions achieving genome-wide significance in multi-trait analysis

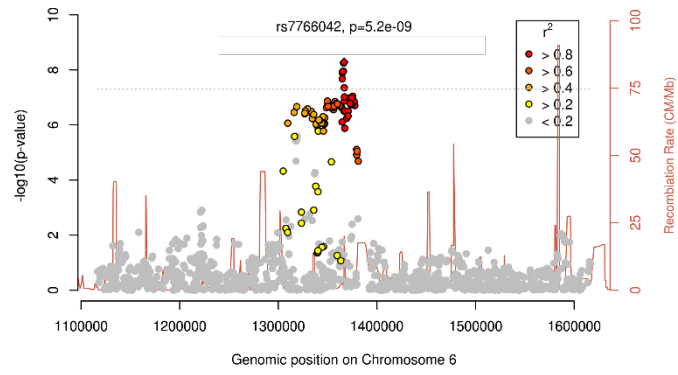

FOXQ1  
 FOXF2  
 MIR6720  
 FOXC1

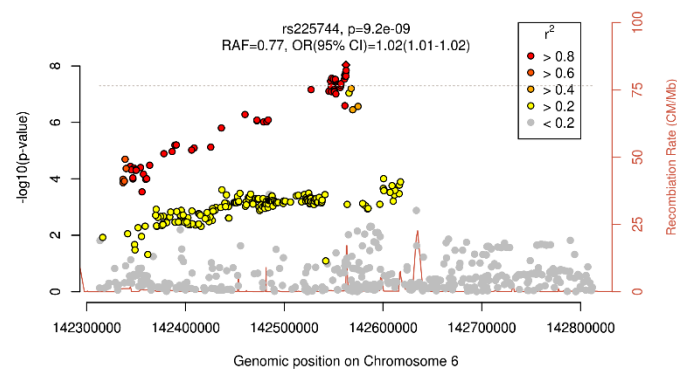

NMBR  
 VTA1  
 GPR126

Supplementary Figure 18 – Forest Plot for Association of rs72934535 at ICA1L-WDR12-CARF-NBEAL1 locus

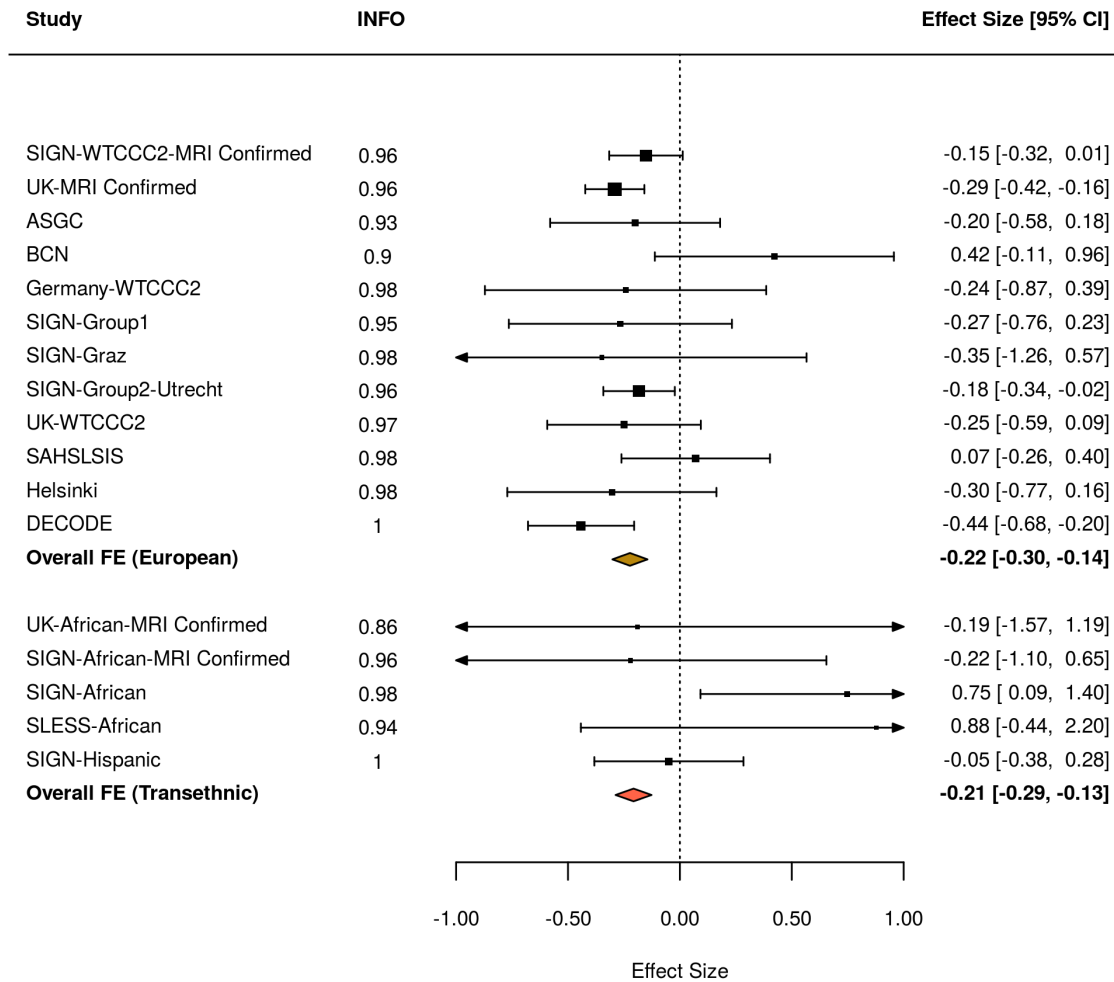

Heterogeneity  $I^2$ , Cochran's Q p-values: 19.6, 0.25 (European); 40.6, 0.05 (Transethnic)

Supplementary Figure 19 – Forest Plot for Association of rs9958650 at ZBTB14-EPB41L3 locus

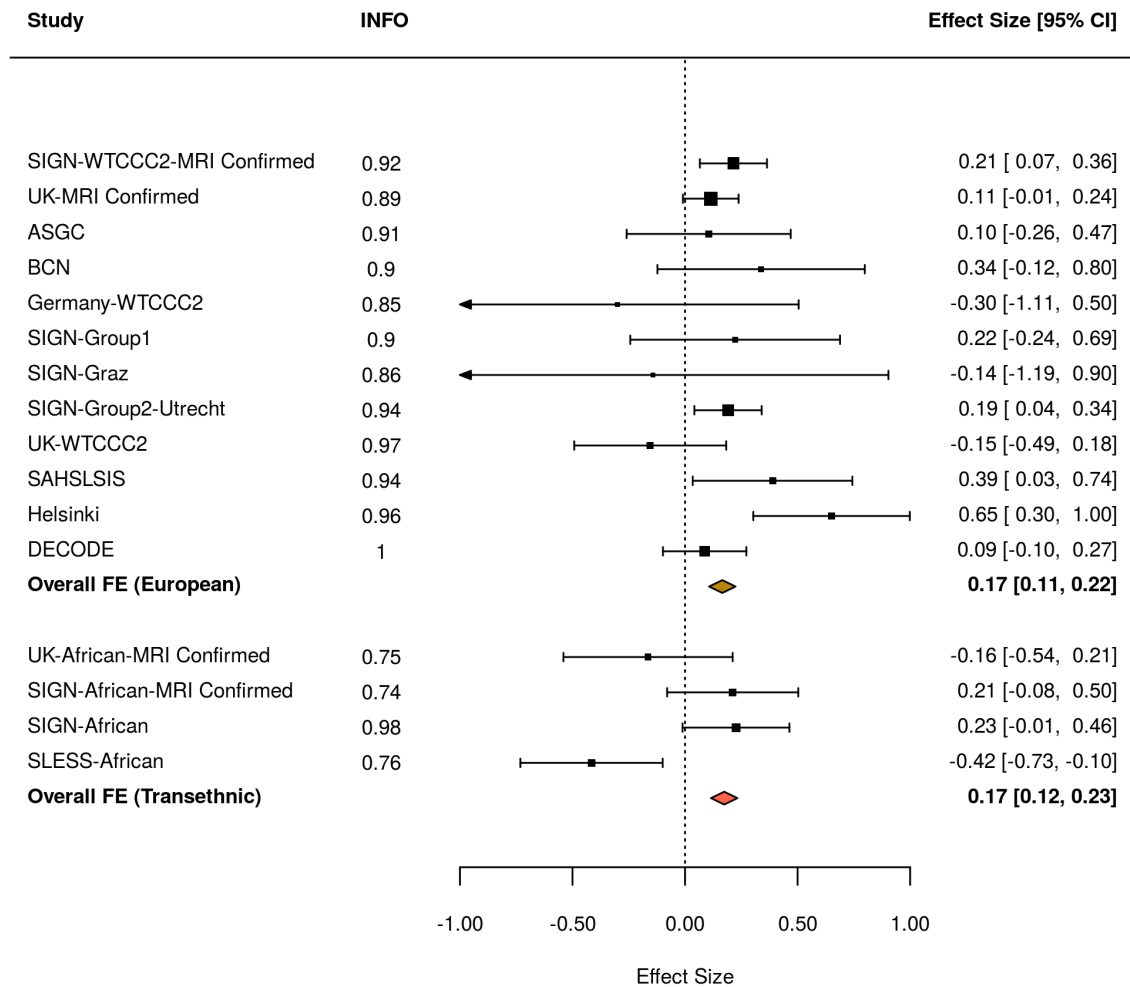

Heterogeneity  $I^2$ , Cochran's Q p-values: 33.2, 0.12 (European); 27.6, 0.14 (Transethnic)

Supplementary Figure 20 – Forest Plot for Association of rs12445022 at ZCCHC14 locus

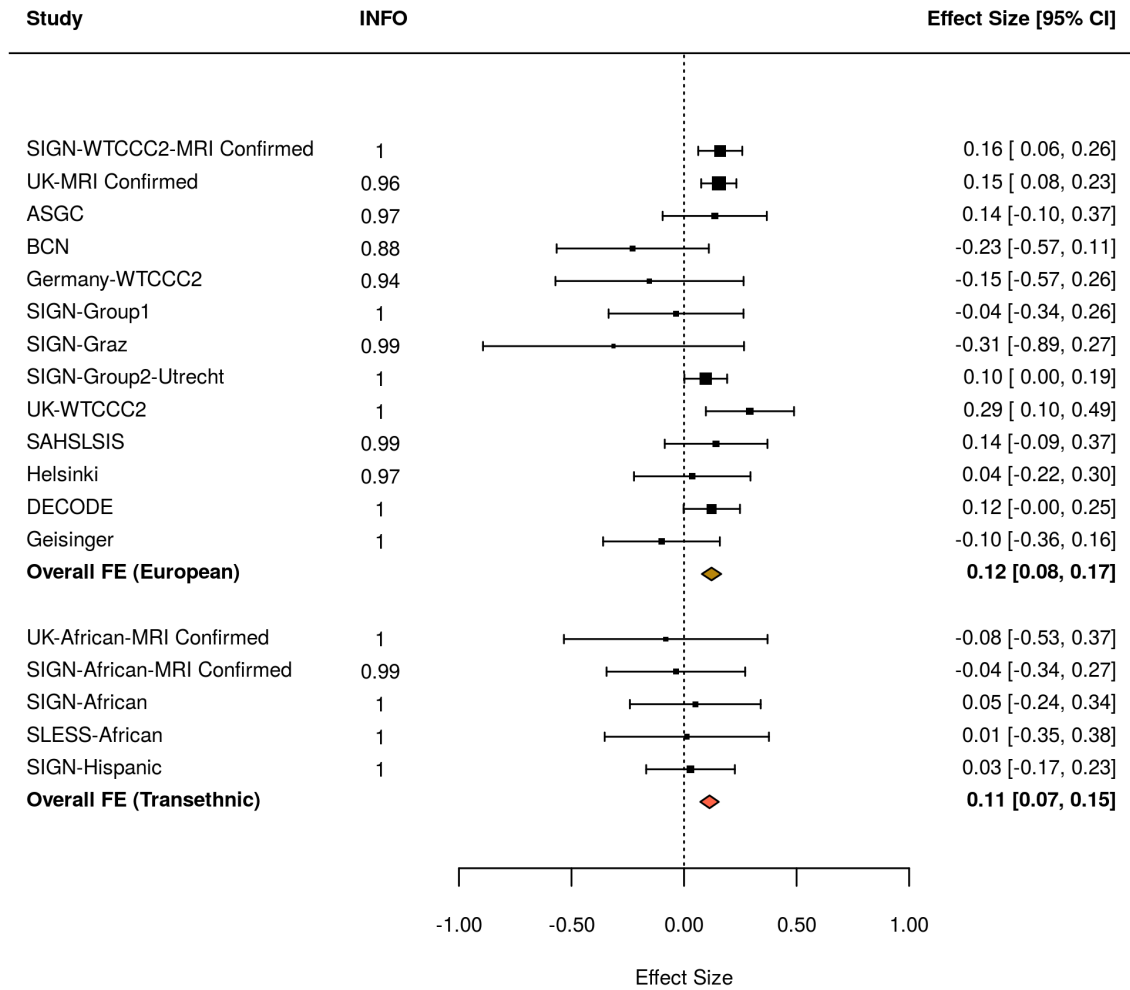

Heterogeneity  $I^2$ , Cochran's Q p-values: 26.6, 0.18 (European); 13.7, 0.29 (Transethnic)

Supplementary Figure 21 – Forest Plot for Association of rs2293576 at SPI1-SLC39A13-PSMC3-RAPSN locus

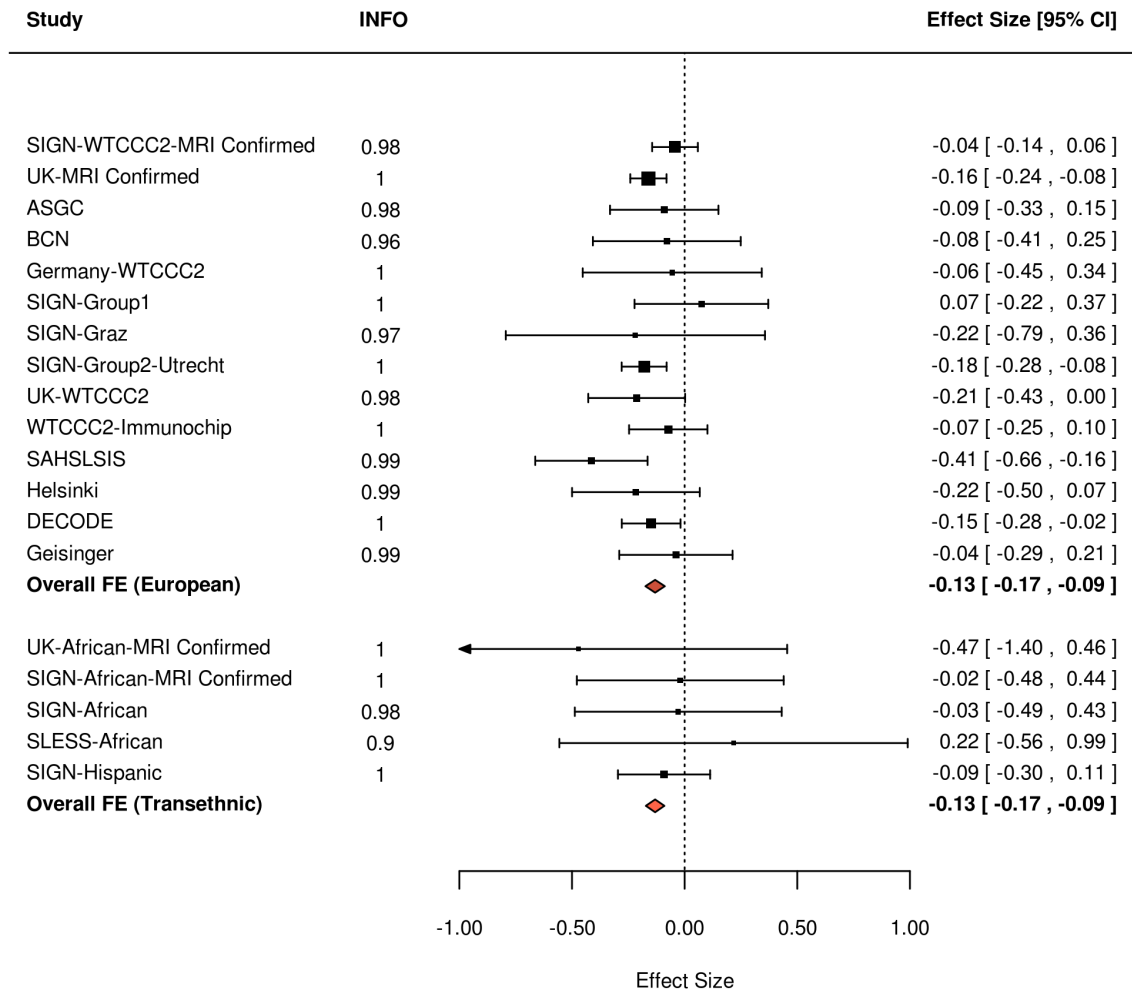

Heterogeneity  $I^2$ , Cochran's Q p-values: 1.8, 0.43 (European); 0.0, 0.65 (Transethnic)



Supplementary Figure 22 – Forest Plot for Association of rs4621303 at ULK4 locus

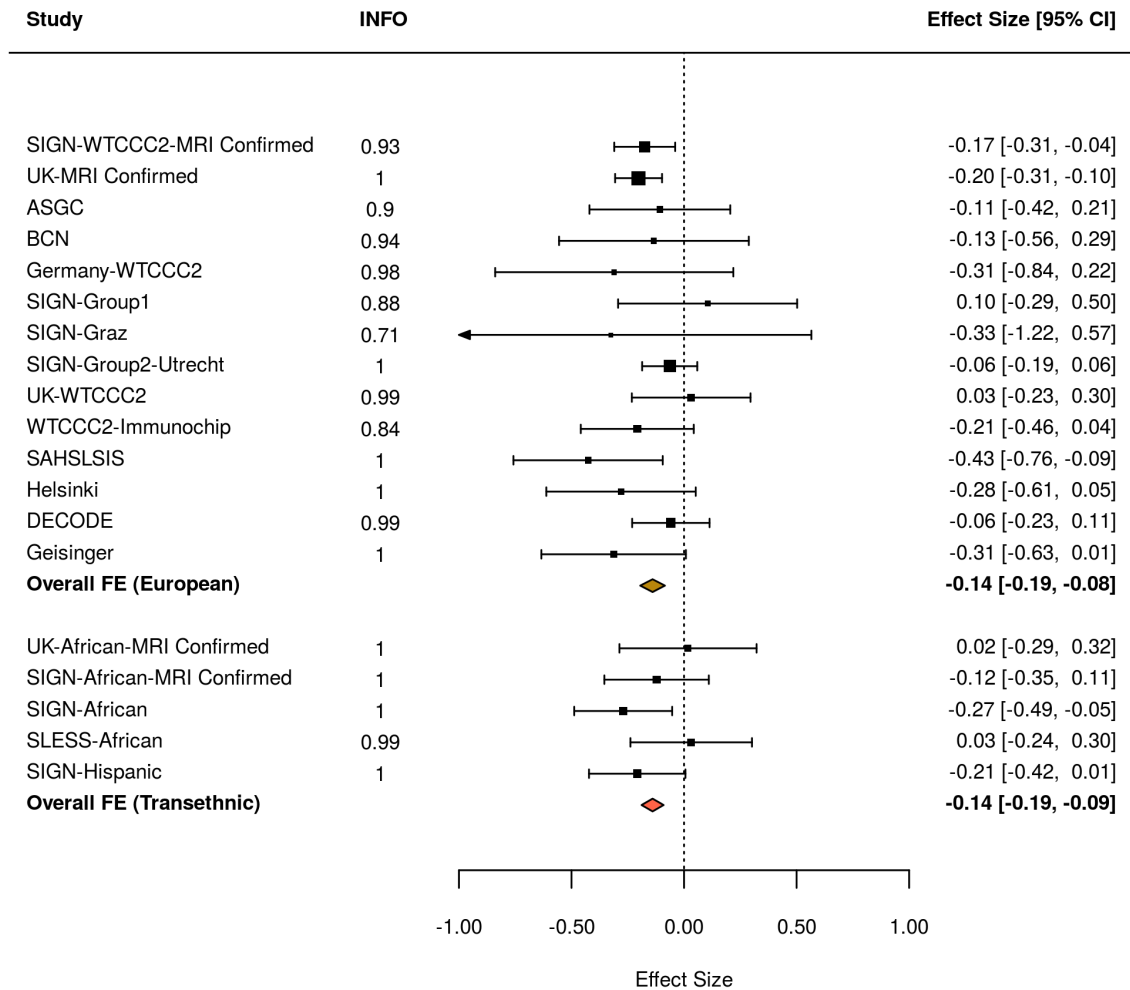

Heterogeneity  $I^2$ , Cochran's Q p-values: 0.0, 0.50 (European); 0.0, 0.56 (Transethnic)

Supplementary Figure 23 – Forest Plot for Association of rs2984613 at SLC25A44-PMF1-BGLAP locus

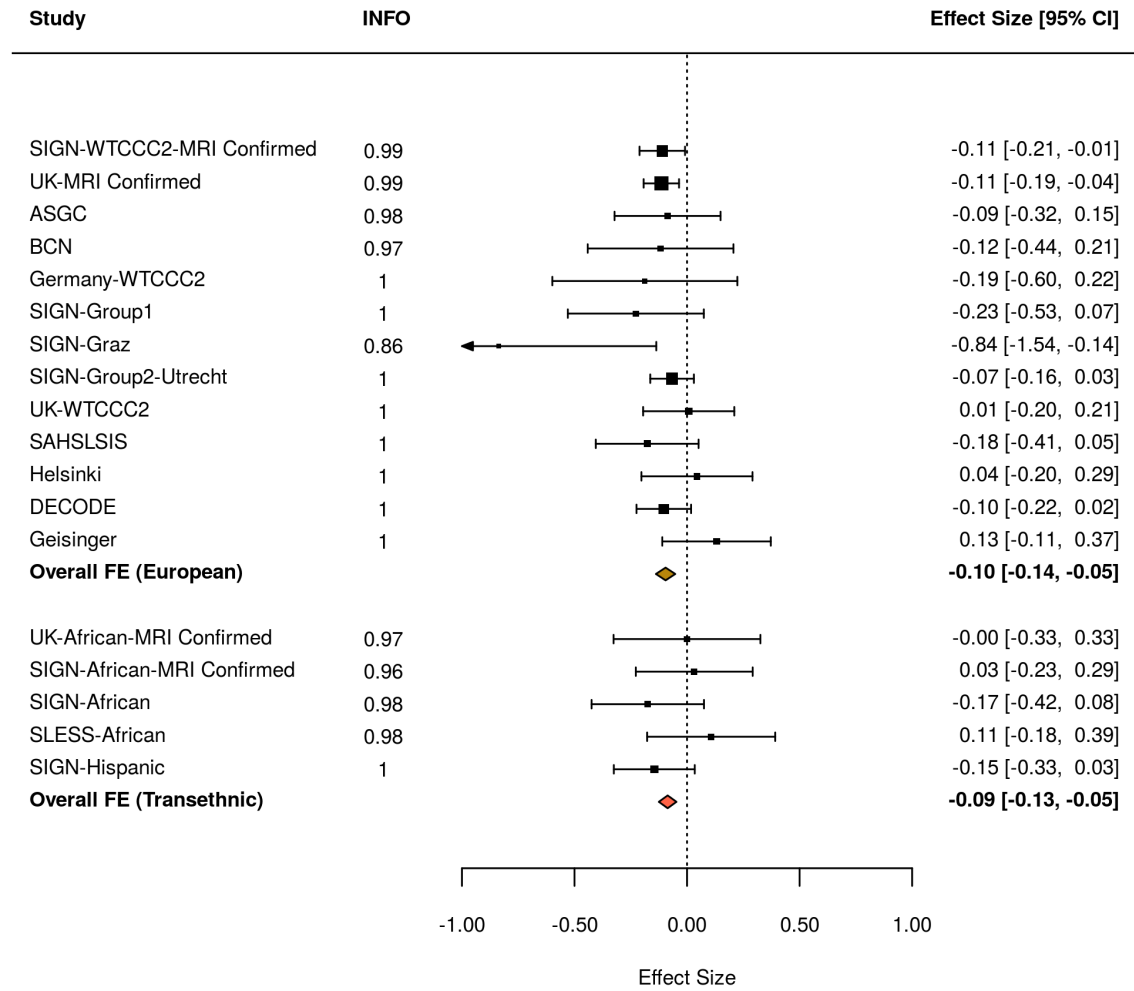

Heterogeneity  $I^2$ , Cochran's Q p-values: 0.0, 0.46 (European); 0.0, 0.57 (Transethnic)

Supplementary Figure 24 – Forest Plot for Association of rs2303655 at LOX-LOC10058541-ZNF474 locus

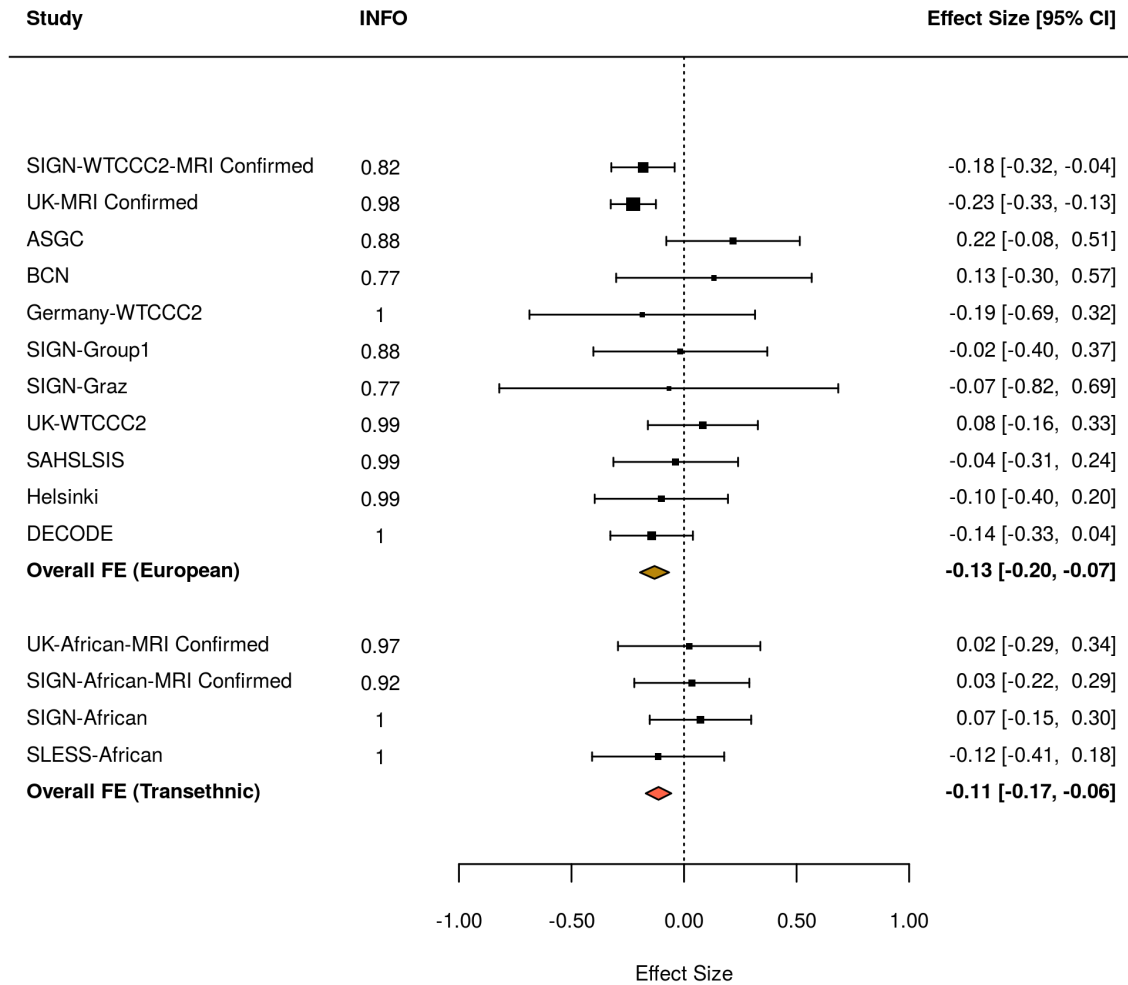

Heterogeneity  $I^2$ , Cochran's Q p-values: 29.6, 0.16 (European); 16.0, 0.27 (Transethnic)

Supplementary Figure 25 – Forest Plot for Association of rs12524544 at FOXF2-FOXQ1 locus

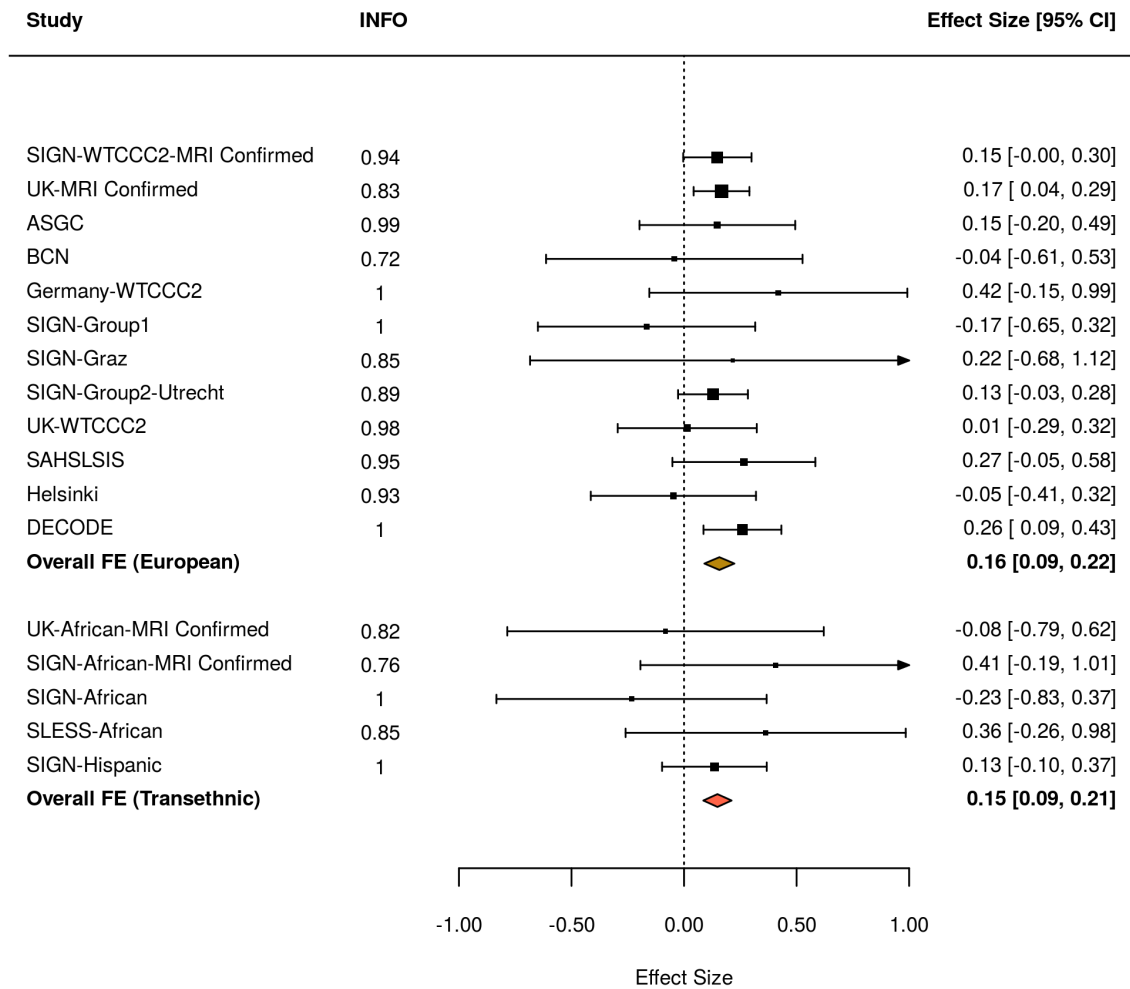

Heterogeneity  $I^2$ , Cochran's Q p-values: 0.0, 0.81 (European); 0.0, 0.82 (Transethnic)

Supplementary Figure 26 – Forest Plot for Association of rs225744 at GPR126-VTA1 locus

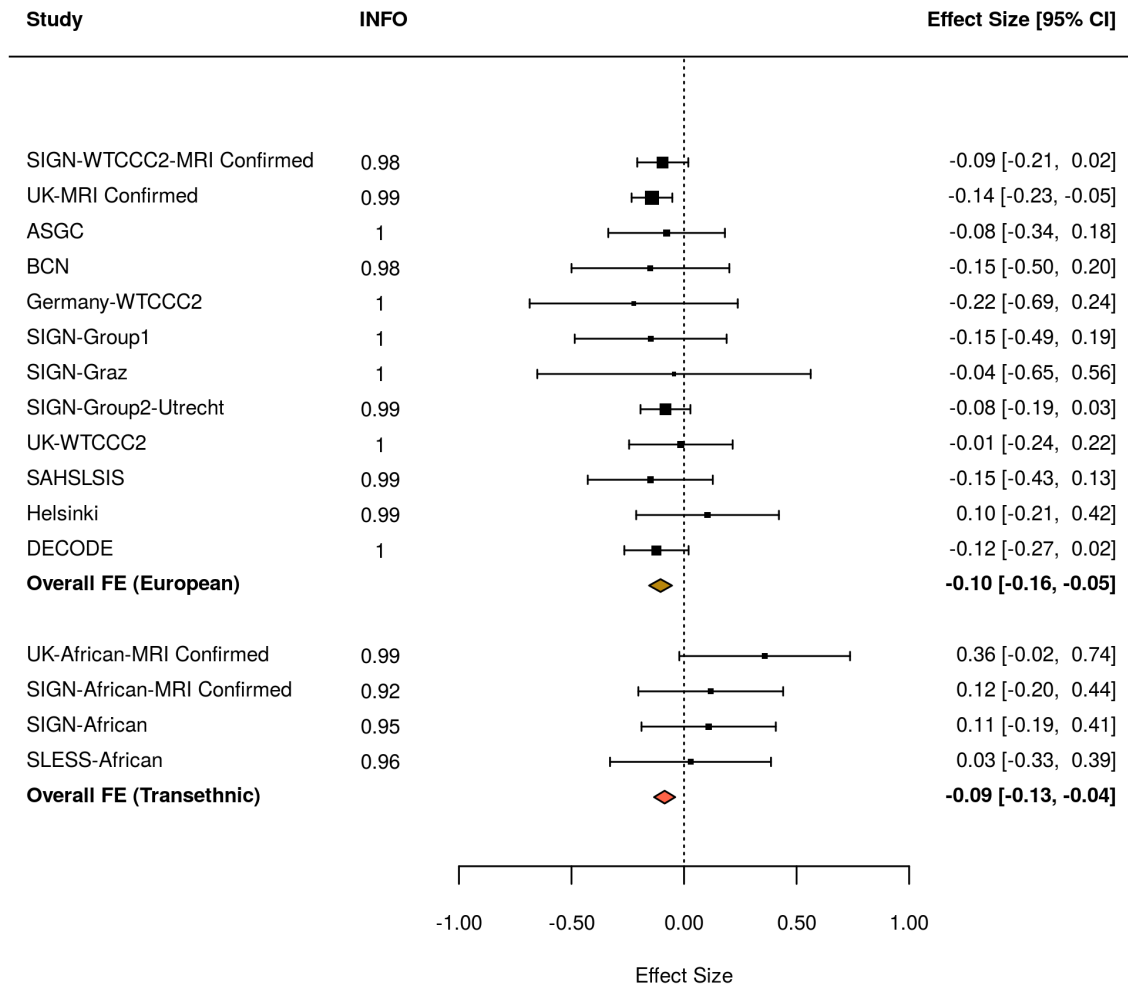

Heterogeneity  $I^2$ , Cochran's Q p-values: 0.0, 0.98 (European); 0.0, 0.64 (Transethnic)

Supplementary Figure 27 – Forest Plot for Association of rs79043147 at HTRA1/ARMS2 locus

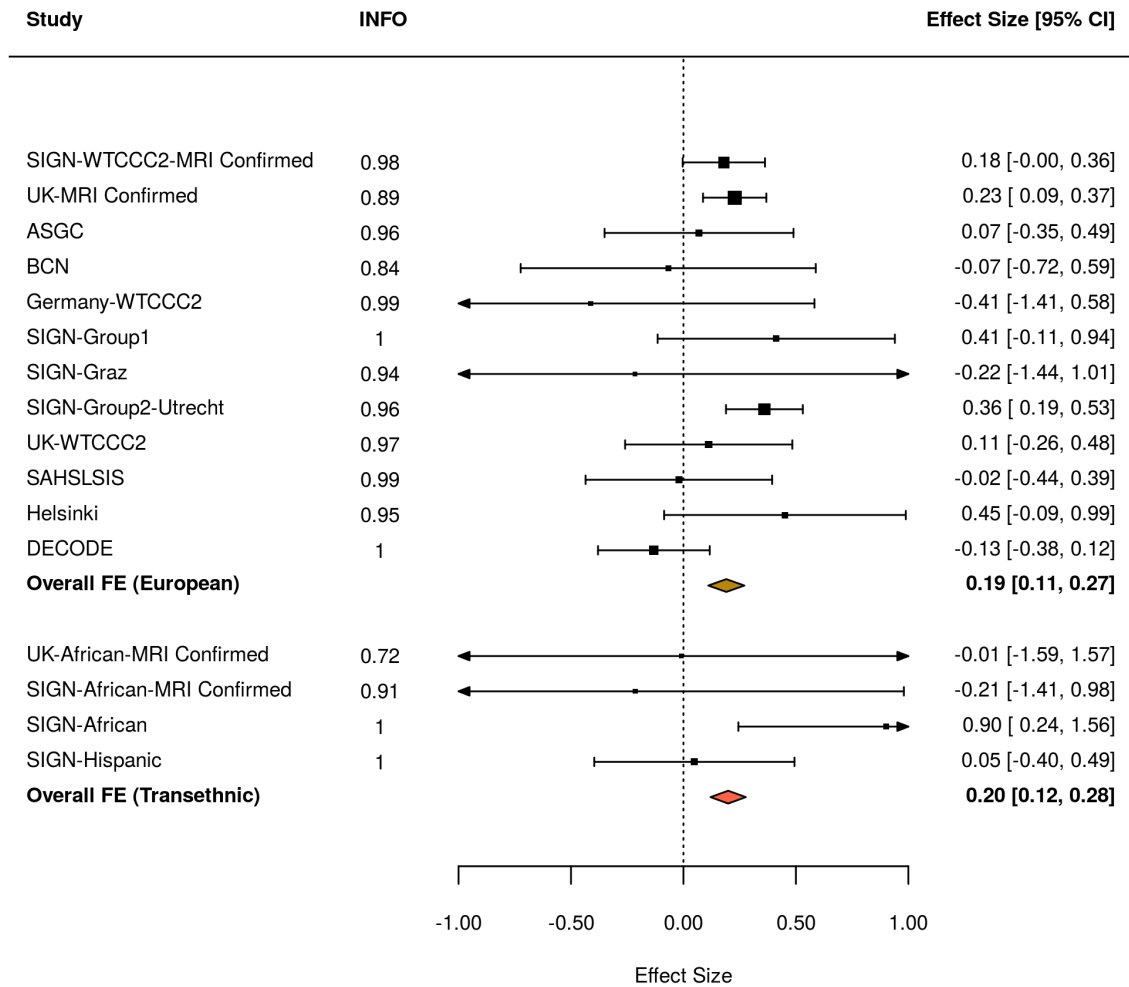

Heterogeneity  $I^2$ , Cochran's Q p-values: 34.6, 0.12 (European); 40.4, 0.06 (Transethnic)

Supplementary Figure 28 – Forest Plot for Association of rs11838776 at COL4A2 locus

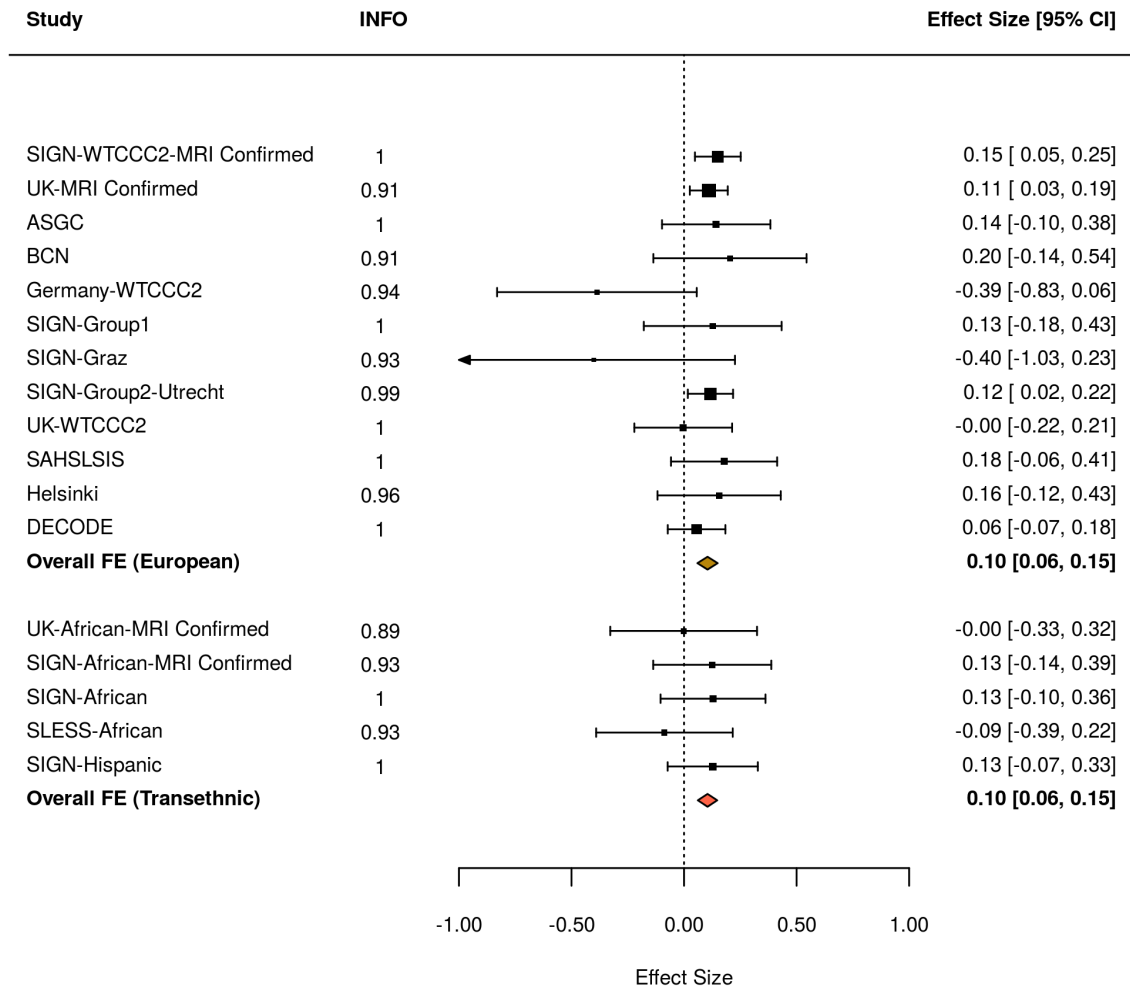

Heterogeneity  $I^2$ , Cochran's Q p-values: 0.0, 0.50 (European); 0.0, 0.66 (Transethnic)

### Supplementary Figure 29 - Forest Plot for Association of rs61000833 at SH3PXD2A locus

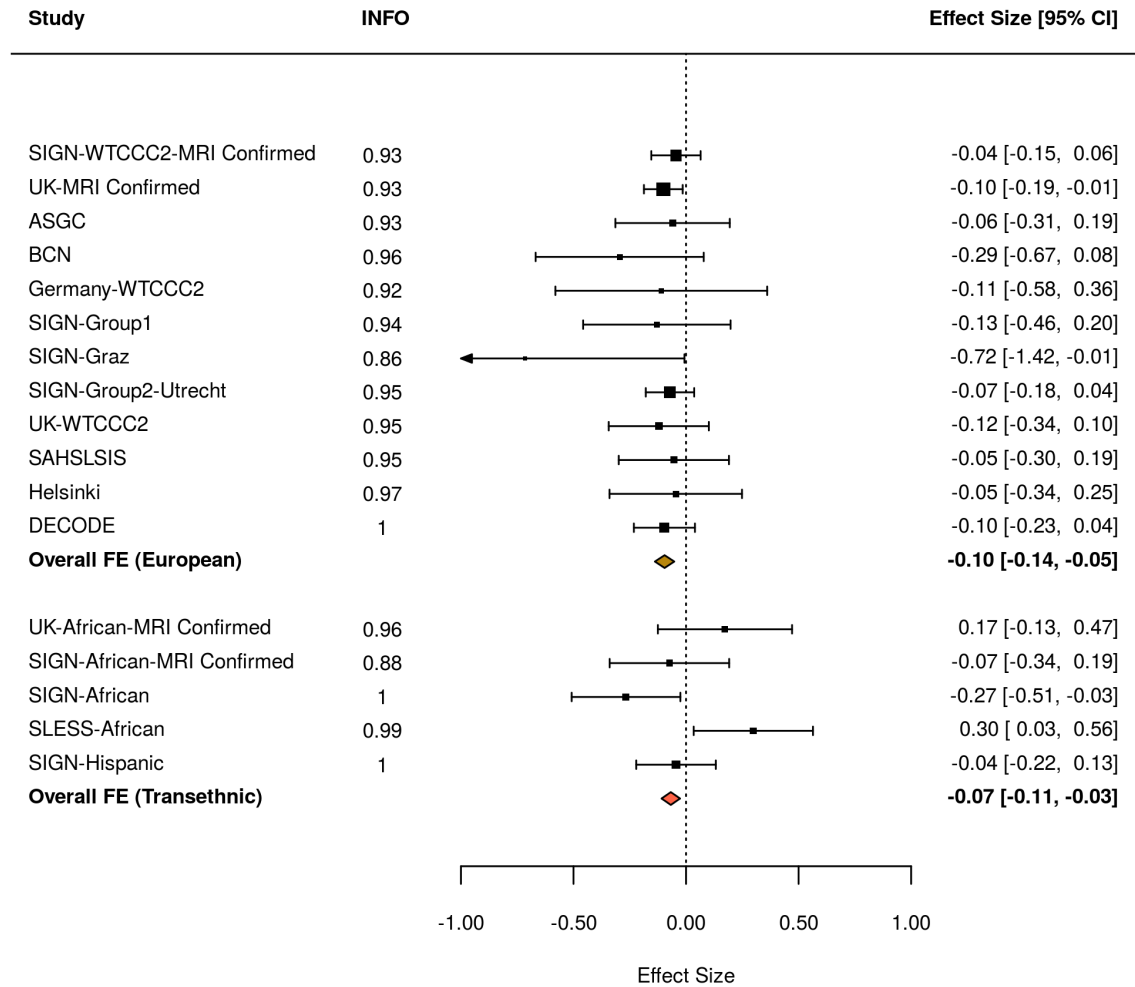

Heterogeneity  $I^2$ , Cochran's Q p-values: 0.0, 0.78 (European); 51.5, 0.009 (Transethnic)



Supplementary Figure 30 – Mendelian Randomization Results for Causal Impact of Body Mass Index on Lacunar Stroke

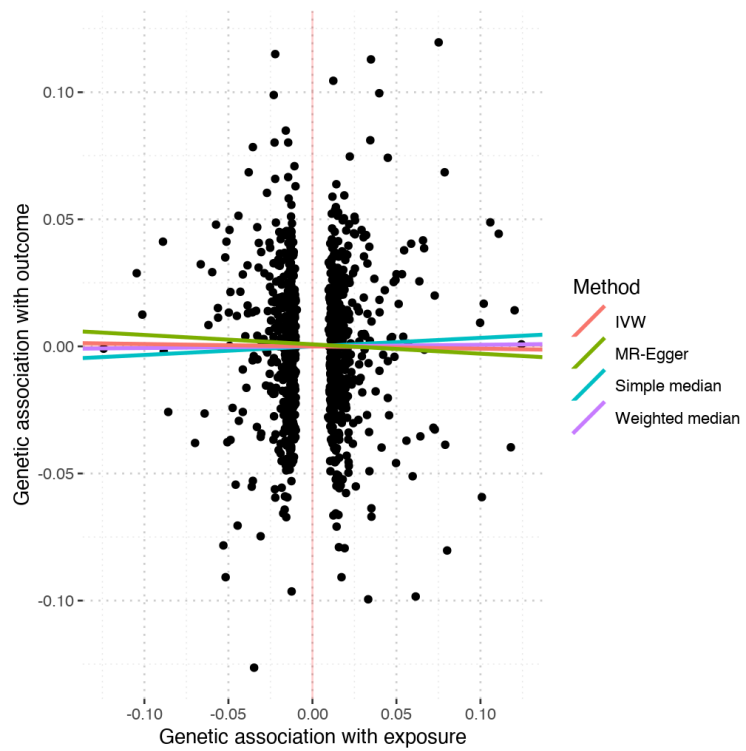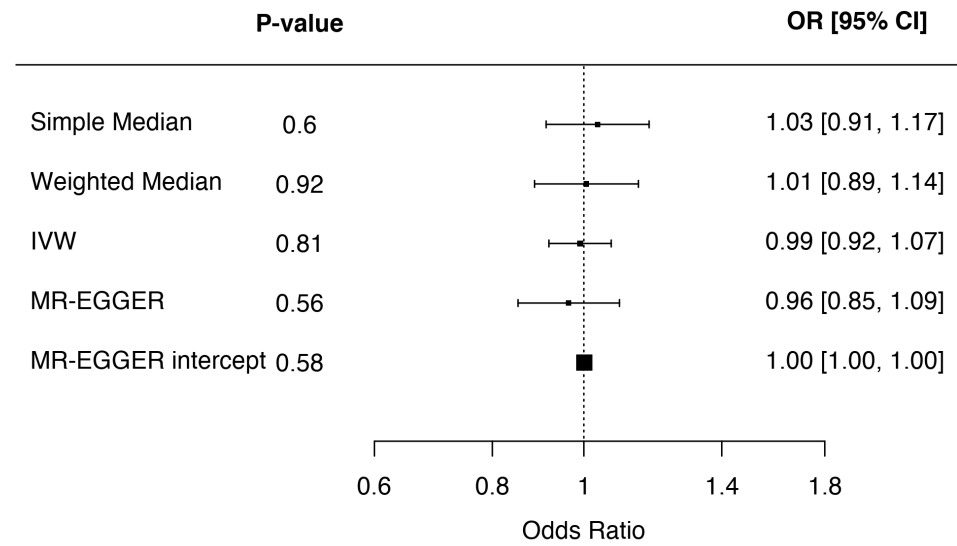

Supplementary Figure 31 – Mendelian Randomization Results for Causal Impact of Diastolic Blood Pressure on Lacunar Stroke

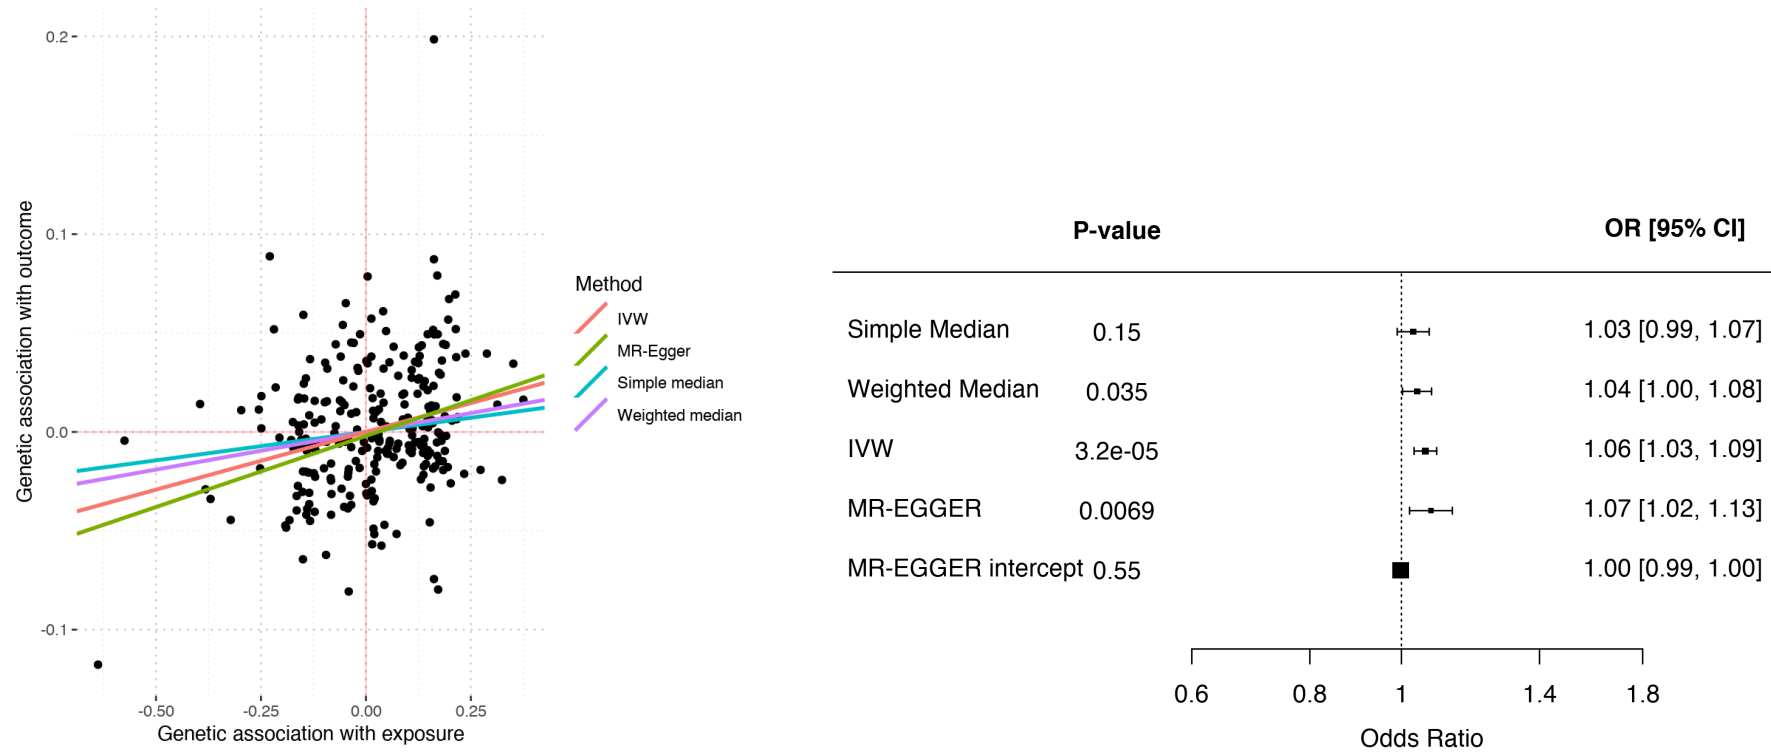

Supplementary Figure 32 – Mendelian Randomization Results for Causal Impact of High Density Lipoprotein on Lacunar Stroke

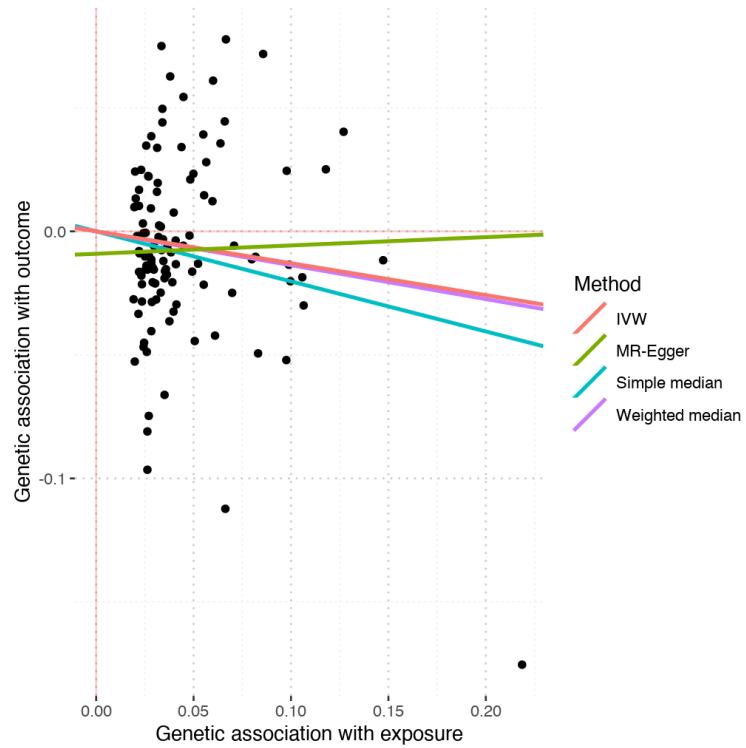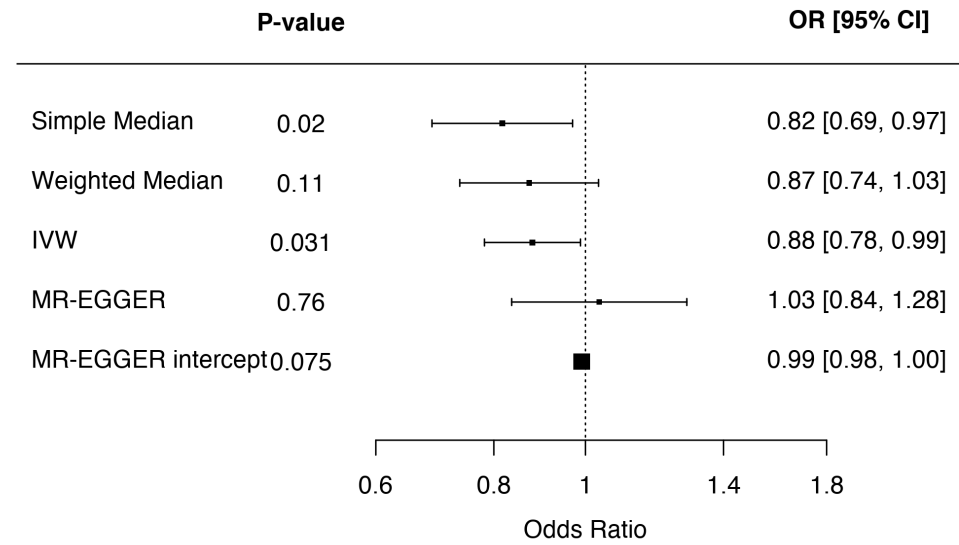

Supplementary Figure 33 – Mendelian Randomization Results for Causal Impact of Low Density Lipoprotein on Lacunar Stroke

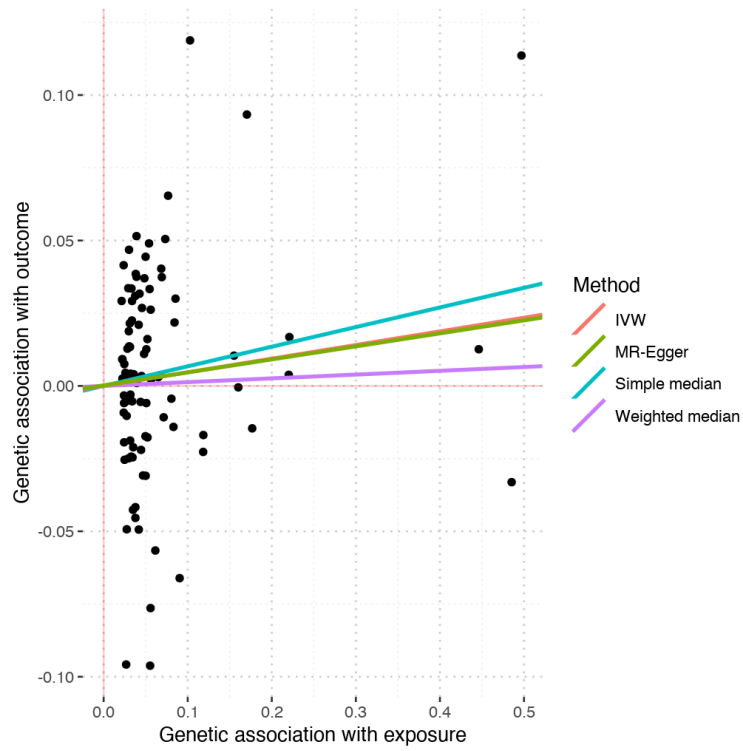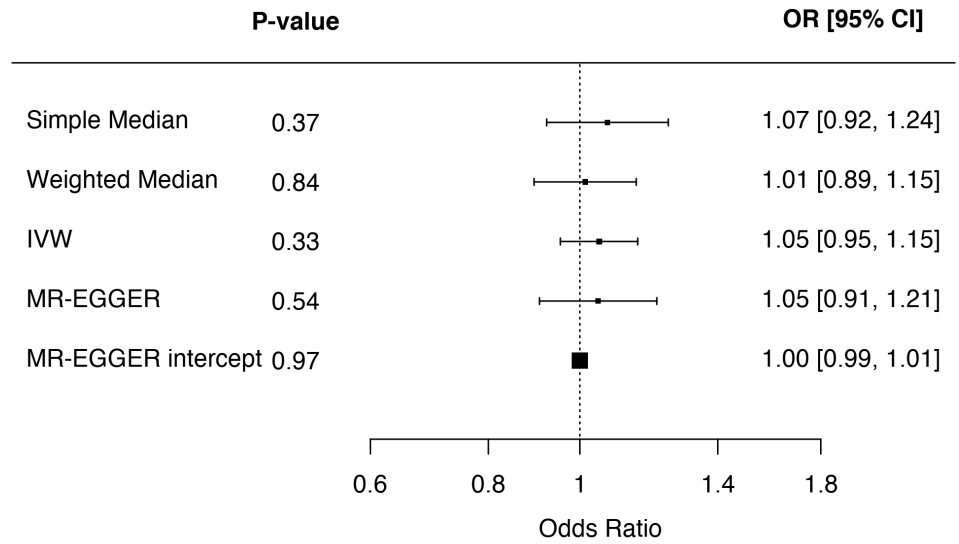

Supplementary Figure 34 – Mendelian Randomization Results for Causal Impact of Pulse Pressure on Lacunar Stroke

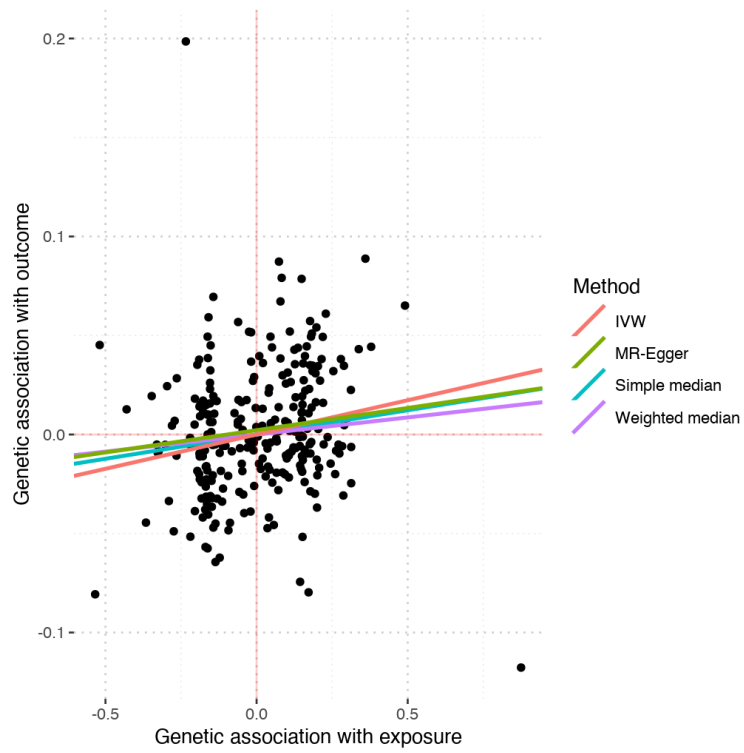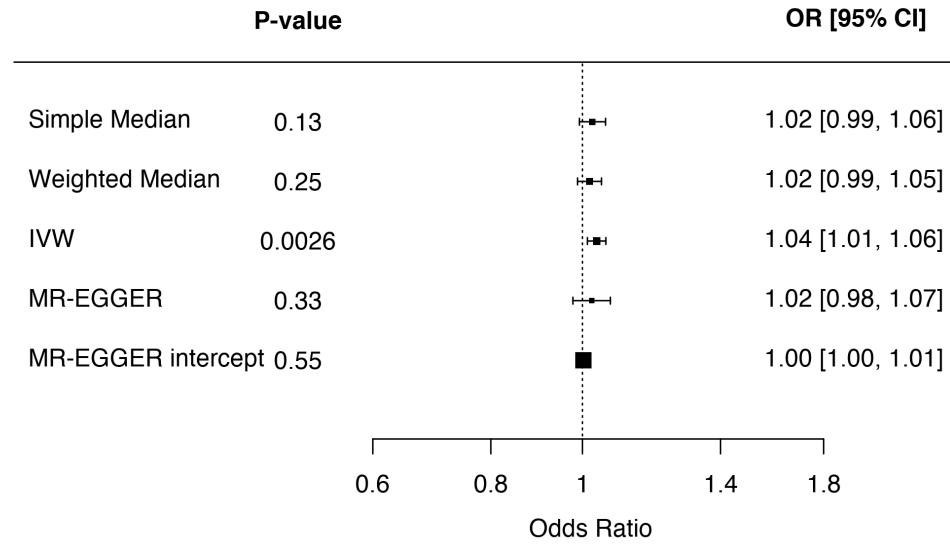

**Supplementary Figure 35 – Mendelian Randomization Results for Causal Impact of Systolic Blood Pressure on Lacunar Stroke**

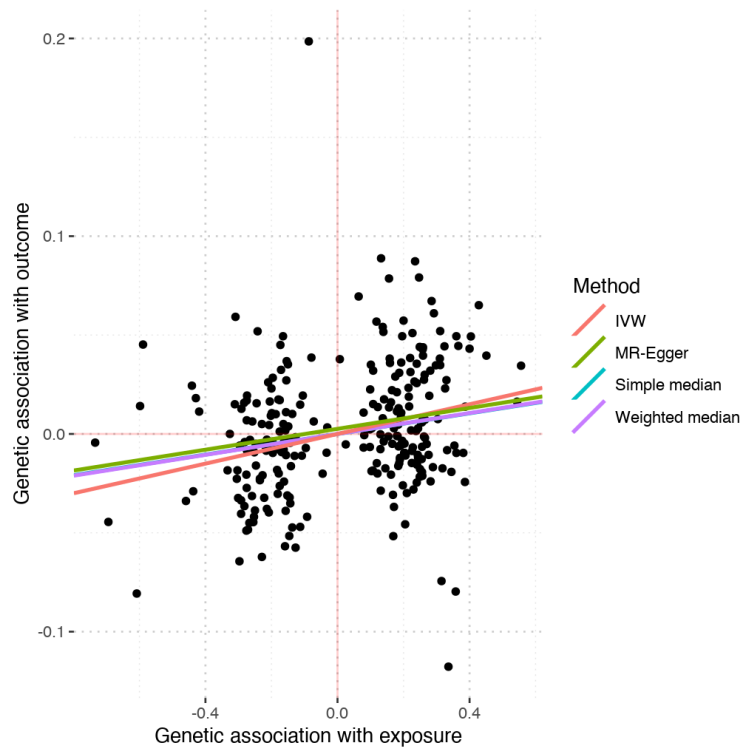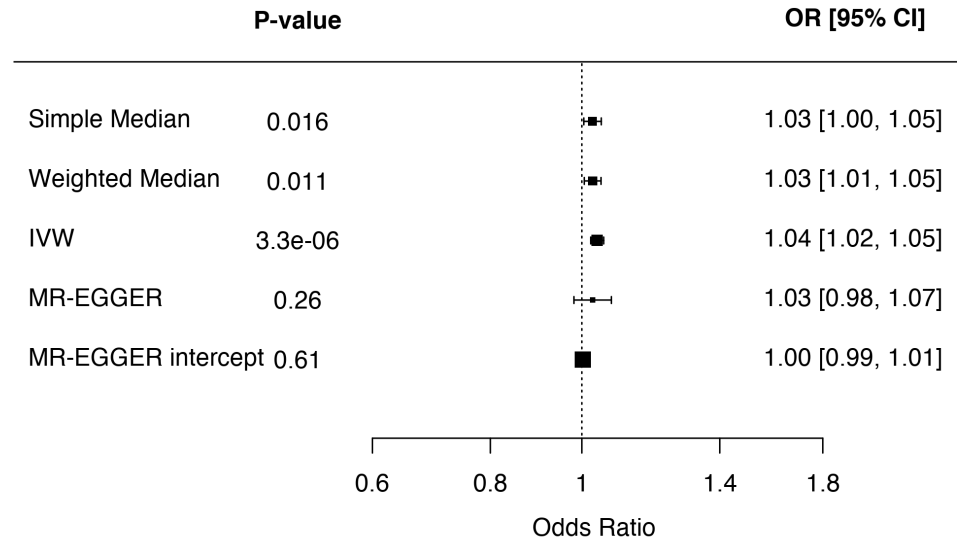

Supplementary Figure 36 – Mendelian Randomization Results for Causal Impact of Ever Smoking on Lacunar Stroke

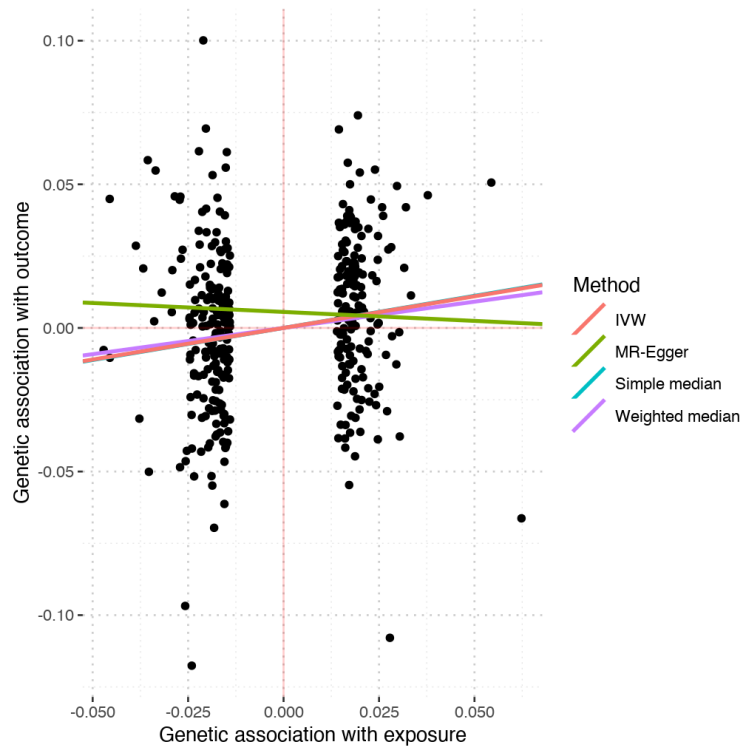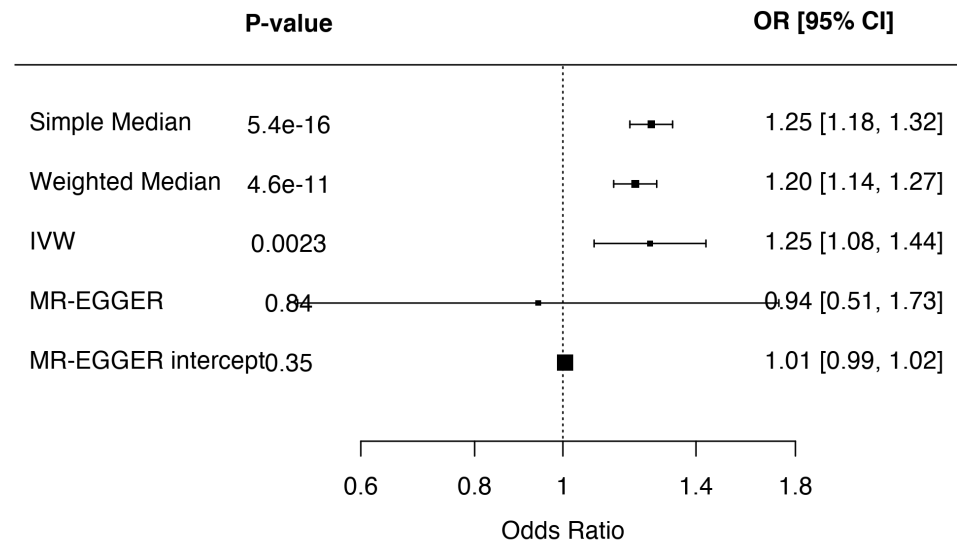

Supplementary Figure 37 – Mendelian Randomization Results for Causal Impact of Triglycerides on Lacunar Stroke

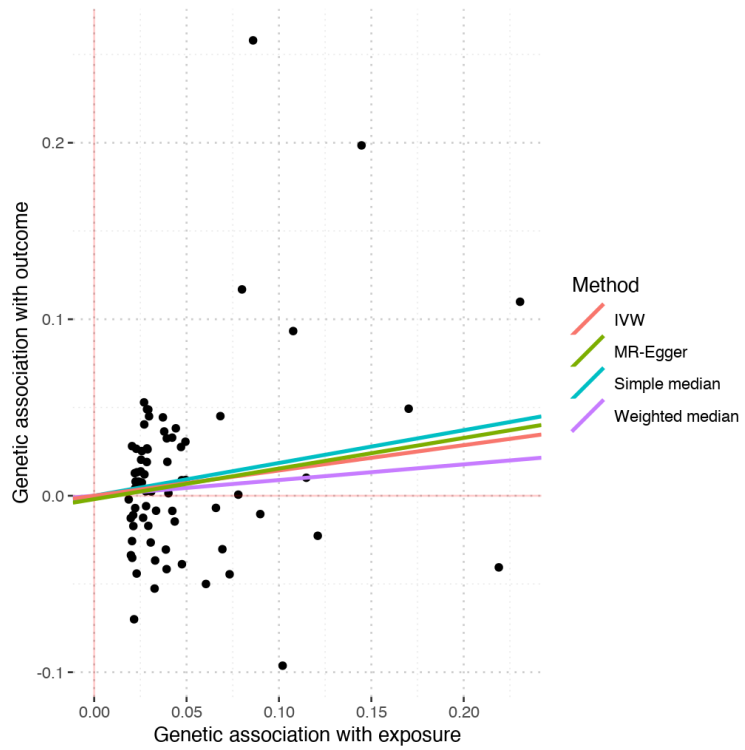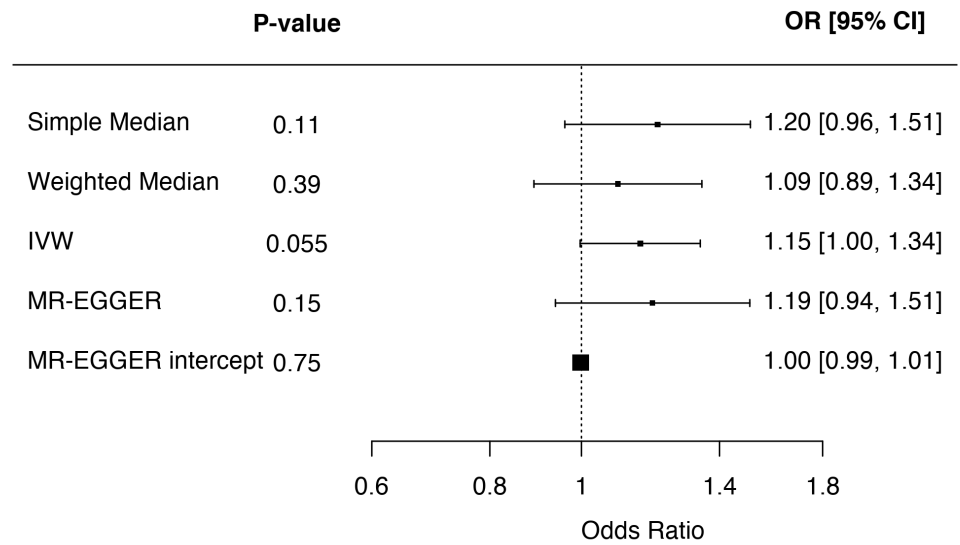



Supplementary Figure 38 – Mendelian Randomization Results for Causal Impact of Type 2 Diabetes on Lacunar Stroke

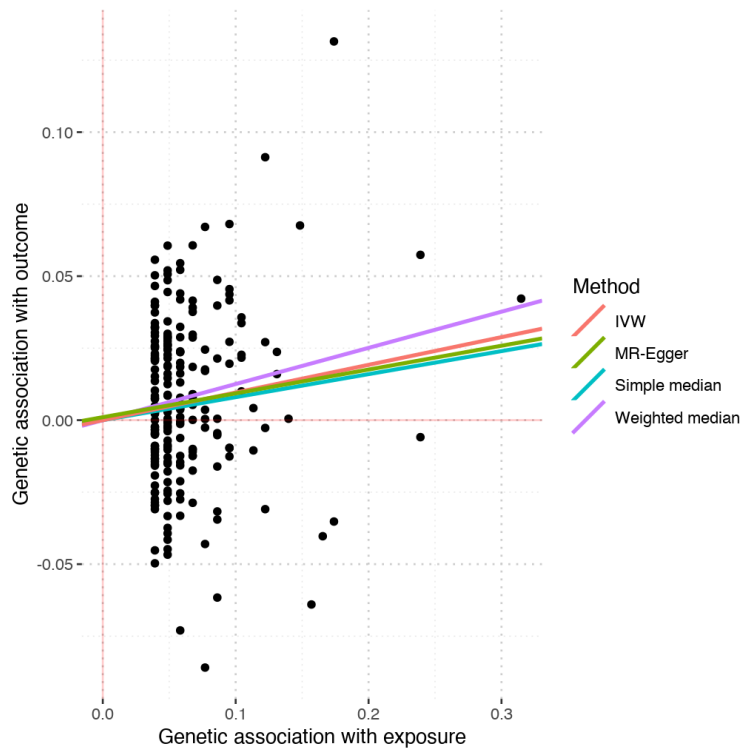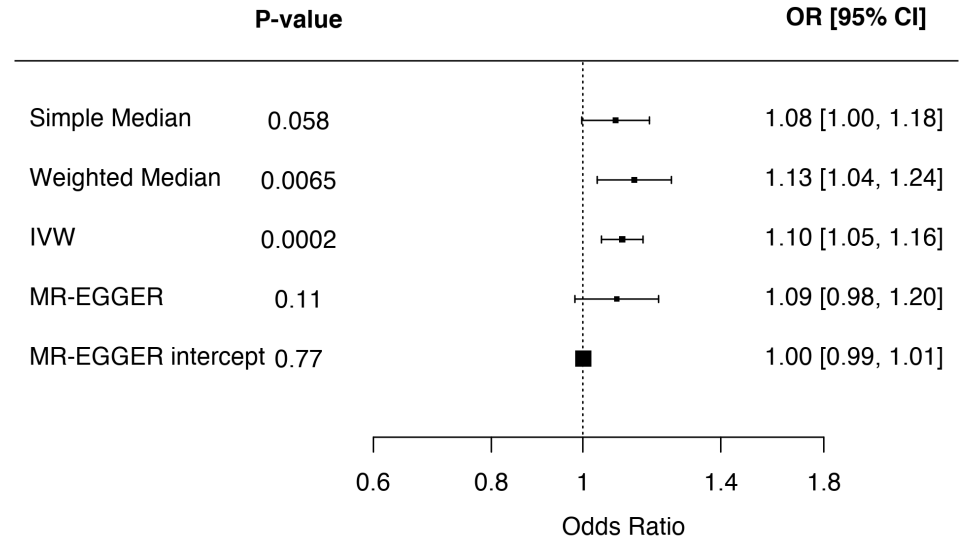

## UK DNA Lacunar 2 Stroke Study Investigators

### Participating Centres:

| SITE ID | Hospital, Trust                                                                                                                         | PI                      |
|---------|-----------------------------------------------------------------------------------------------------------------------------------------|-------------------------|
| UK01    | <b>Addenbrooke's Hospital</b> , Cambridge University Hospitals NHS Foundation Trust                                                     | Prof. Hugh Markus       |
| UK02    | <b>James Paget Hospital</b> , James Paget University Hospitals NHS Foundation Trust                                                     | Dr Carlo Canepa         |
| UK03    | <b>Peterborough City Hospital</b> , North West Anglia NHS Foundation Trust                                                              | Dr Santhosh Subramonian |
| UK04    | <b>North Middlesex Hospital</b> , North Middlesex University Hospital NHS Trust                                                         | Dr Robert Luder         |
| UK05    | <b>Royal Stoke University Hospital</b> , University Hospital of North Midlands NHS Trust                                                | Dr Janaka Weerathunga   |
| UK06    | <b>Royal London Hospital</b> , Barts Health NHS Trust                                                                                   | Dr Roser Icart          |
| UK07    | <b>West Suffolk Hospital</b> , West Suffolk NHS Foundation Trust                                                                        | Dr Abul Azim            |
| UK08    | <b>Watford General Hospital</b> , West Hertfordshire Hospital Trust                                                                     | Dr Mohit Bhandari       |
| UK09    | <b>Royal Cornwall Hospital</b> , Royal Cornwall Hospitals NHS Trust                                                                     | Dr Frances Harrington   |
| UK10    | <b>New Cross Hospital</b> , The Royal Wolverhampton NHS Trust                                                                           | Dr Nasar Ahmad          |
| UK12    | <b>King's Mill Hospital</b> , Sherwood Forest Hospitals Foundation Trust                                                                | Dr Martin Cooper        |
| UK13    | <b>King's College Hospital (Denmark Hill) &amp; Princess Royal University Hospital</b> , Kings College Hospital NHS Foundation Trust    | Dr James Teo            |
| UK14    | <b>The Queen Elizabeth Hospital, Kings Lynn</b> , Queen Elizabeth Hospital Kings Lynn NHS Trust                                         | Dr Umesh Rai            |
| UK15    | <b>Countess of Chester Hospital</b> , Countess of Chester Hospital NHS Foundation Trust                                                 | Dr Kausik Chatterjee    |
| UK16    | <b>Leeds General Infirmary</b> , Leeds Teaching Hospitals NHS Trust                                                                     | Dr Ahammad Hassan       |
| UK17    | <b>Royal Hallamshire Hospital</b> , Sheffield Teaching Hospitals NHS Foundation Trust                                                   | Dr Kirsty Harkness      |
| UK19    | <b>University Hospital of North Tees and University Hospital of Hartlepool</b> , North Tees & Hartlepool Hospitals NHS Foundation Trust | Dr Ijaz Anwar           |
| UK20    | <b>Lister Hospital</b> , East & North Hertfordshire NHS Trust                                                                           | Dr Aparna Pusalkar      |
| UK21    | <b>Royal Bournemouth General Hospital</b> , Royal Bournemouth & Christchurch NHS Foundation Trust                                       | Dr Kamy Thavansan       |
| UK22    | <b>Royal Hampshire County Hospital</b> , Hampshire Hospitals Foundation Trust                                                           | Dr Nigel Smyth          |
| UK23    | <b>Derriford Hospital</b> , Plymouth Hospitals NHS Trust                                                                                | Dr Ahmed Nor            |
| UK24*   | <b>Torbay Hospital</b> , Torbay & South Devon NHS Foundation Trust                                                                      | Dr Biju Bhaskaran       |
| UK25    | <b>Pinderfields Hospital</b> , Mid Yorkshire Hospitals NHS Trust                                                                        | Dr Prabal Datta         |
| UK27    | <b>Royal Devon &amp; Exeter Hospital (Wonford)</b> , Royal Devon & Exeter NHS Foundation Trust                                          | Dr Martin James         |
| UK28    | <b>University College Hospital</b> , University College London Hospitals NHS Foundation Trust                                           | Prof David Werring      |
| UK29    | <b>Nottingham City Hospital Campus</b> , Nottingham University Hospitals NHS Trust                                                      | Dr Kailash Krishnan     |
| UK30    | <b>Salford Royal Hospital</b> , Salford Royal NHS Foundation Trust                                                                      | Dr Jane Molloy          |
| UK31    | <b>James Cook University Hospital</b> , South Tees Hospitals NHS Foundation Trust                                                       | Dr Adrian Bergin        |
| UK32    | <b>University Hospital of North Durham</b> , County Durham and Darlington NHS Foundation Trust                                          | Dr Yogish Pai           |
| UK33    | <b>Yeovil District Hospital</b> , Yeovil District Hospital NHS Foundation Trust                                                         | Dr Khalid Rashed        |
| UK34    | <b>St Peter's Hospital</b> , Ashford & St Peters Hospitals NHS Foundation Trust                                                         | Dr Brendan Affley       |
| UK35    | <b>Sandwell General Hospital</b> , Sandwell and West Birmingham Hospitals NHS Trust                                                     | Dr David Gull           |
| UK36    | <b>St Thomas' Hospital</b> , Guys & St Thomas' Hospitals NHS Foundation Trust                                                           | Dr Jonathan Birns       |
| UK37*   | <b>Royal Sussex County Hospital</b> , Brighton & Sussex University Hospitals NHS Trust                                                  | Prof Raj Rajkumar       |
| UK38    | <b>Southampton General Hospital</b> , University Hospital Southampton NHS Foundation Trust                                              | Dr Emma Battersby-Wood  |
| UK39    | <b>Doncaster Royal Infirmary</b> , Doncaster & Bassetlaw Teaching Hospitals NHS Foundation Trust                                        | Dr Dinesh Chada         |
| UK40    | <b>St George's Hospital (Tooting)</b> , St George's University Hospitals NHS Foundation Trust                                           | Dr Bhavini Patel        |
| UK41    | <b>Wycombe Hospital</b> , Buckinghamshire Healthcare NHS Trust                                                                          | Dr Matthew Burn         |
| UK42    | <b>Musgrove Park Hospital</b> , Somerset NHS Foundation Trust                                                                           | Dr Malik Hussain        |
| UK43    | <b>Scunthorpe General Hospital</b> , Northern Lincolnshire and Goole NHS Foundation Trust                                               | Dr Amit Banerjee        |
| UK44    | <b>Ipswich Hospital</b> , East Suffolk and North Essex NHS Foundation Trust                                                             | Dr Sajid Alam           |
| UK45    | <b>Southend University Hospital</b> , Southend University Hospital NHS Foundation Trust                                                 | Dr Paul Guyler          |
| UK46    | <b>Gloucestershire Royal Hospital</b> , Gloucestershire Hospitals NHS Foundation Trust                                                  | Dr Dipankar Dutta       |
| UK47    | <b>Queen Elizabeth The Queen Mother Hospital</b> , East Kent Hospitals University NHS Foundation Trust                                  | Dr Saidu Abubakar       |
| UK48    | <b>Colchester Hospital</b> , East Suffolk and North Essex NHS Foundation Trust                                                          | Dr Rajesh Kumar Saksena |

| <b>SITE ID</b> | <b>Hospital, Trust</b>                                                                                           | <b>PI</b>               |
|----------------|------------------------------------------------------------------------------------------------------------------|-------------------------|
| UK49           | <b>Royal Derby Hospital</b> , University Hospitals of Derby and Burton NHS Foundation Trust                      | Dr Tim England          |
| UK50           | <b>Croydon University Hospital</b> , Croydon Health Services NHS Trust                                           | Dr Karen Kee            |
| UK51           | <b>Norfolk &amp; Norwich University Hospital</b> , Norfolk and Norwich University Hospitals NHS Foundation Trust | Dr Kneale Metcalf       |
| UK52           | <b>Leicester Royal Infirmary</b> , University Hospitals of Leicester NHS Trust                                   | Dr Amit Mistri          |
| UK53           | <b>William Harvey Hospital</b> , East Kent Hospitals University NHS Foundation Trust                             | Dr Ibrahim Balogun      |
| UK54           | <b>Medway Maritime Hospital</b> , Medway NHS Foundation Trust                                                    | Dr Samuel Sanmuganathan |

## UK DNA Lacunar Stroke Study Investigators

*Study managers:* Josie Monaghan; Alan Zanich, Samantha Febrey, Eithne Smith, Jenny Lennon, St George's University of London

*Database cleaning:* Loes Rutten-Jacobs, University of Cambridge

*Participating centres (number of enrolled patients per centre; local investigators):*

Aberdeen Royal Infirmary, Aberdeen (12; Mary Macleod). Addenbrooke's Hospital, Cambridge (54; Jean-Claude Baron, Elizabeth Warburton, Diana J Day, Julie White). Airedale General Hospital, Steeton (4; Samantha Mawer). Barnsley Hospital, Barnsley (3; Mohammad Albazzaz, Pravin Torane, Keith Elliott, Kay Hawley). Bart's and the London, London (2; Patrick Gompertz). Basingstoke and North Hampshire Hospital, Basingstoke (13; Elio Giallombardo, Deborah Dellafera). Blackpool Victoria Hospital, Blackpool (11; Mark O'Donnell). Bradford Royal Infirmary, Bradford (1; Chris Patterson). Bristol Royal Infirmary, Bristol (8; Sarah Caine). Charing Cross Hospital, London (12; Pankaj Sharma). Cheltenham General and Gloucester Royal Hospitals, Cheltenham and Gloucester (10; Dipankar Dutta). Chesterfield Royal Hospital, Chesterfield (4; Sunil Punnoose, Mahmud Sajid). Countess of Chester Hospital, Chester (22; Kausik Chatterjee). Derriford Hospital, Plymouth (4; Azlisham Mohd Nor). Dorset County Hospital NHS Foundation Trust, Dorchester (6; Rob Williams). East Kent Hospitals University NHS Foundation Trust, Kent (22; Hardeep Baht, Guna Gunathilagan). Eastbourne District General Hospital, Eastbourne (4; Conrad Athulathmudali). Frenchay Hospital, Bristol (1; Neil Baldwin). Frimley Park Hospital NHS Foundation Trust, Frimley (6; Brian Clarke). Guy's and St Thomas' Hospital, London (14; Tony Rudd). Institute of Neurology, London (25; Martin Brown). James Paget University Hospital, Great Yarmouth (1; Peter Harrison). King's College Hospital, London (16; Lalit Kalra). Leeds Teaching Hospitals NHS Trust, London (125; Ahamad Hassan). Leicester General Hospital and Royal Infirmary, Leicester (9; Tom Robinson, Amit Mistri). Luton and Dunstable NHSFT University Hospital, Luton (16; Lakshmanan Sekaran, Sakthivel Sethuraman, Frances Justin). Maidstone and Tunbridge Wells NHS Trust (3; Peter Maskell). Mayday University Hospital, Croydon (14; Enas Lawrence). Medway Maritime Hospital, Gillingham (5; Sam Sanmuganathan). Milton Keynes Hospital, Milton Keynes (1; Yaw Duodu). Musgrove Park Hospital, Taunton (9; Malik Hussain). Newcastle Hospitals NHS Foundation Trust, Newcastle upon Tyne (12; Gary Ford). Ninewells Hospital, Dundee (5; Ronald MacWalter). North Devon District Hospital, Barnstaple (8; Mervyn Dent). Nottingham University Hospitals, Nottingham (17; Philip Bath, Fiona Hammonds). Perth Royal Infirmary, Perth (2; Stuart Johnston). Peterborough City Hospital, Peterborough (1; Peter Owusu-Agyei). Queen Elizabeth Hospital, Gateshead (5; Tim Cassidy, Maria Bokhari). Radcliffe Infirmary, Oxford (5; Peter Rothwell). Rochdale Infirmary, Rochdale (4; Robert Namushi). Rotherham General Hospital, Rotherham (1; James Okwera). Royal Cornwall Hospitals NHS Trust, Truro (11; Frances Harrington, Gillian Courtauld). Royal Devon and Exeter Hospital, Exeter (22; Martin James). Royal Hallamshire Hospital, Sheffield (1; Graham Venables). Royal Liverpool University Hospital and Broadgreen Hospital, Liverpool (9; Aravind Manoj). Royal Preston Hospital, Preston (18; Shuja Punekar). Royal Surrey County Hospital, Guildford (23; Adrian Blight, Kath Pasco). Royal Sussex County Hospital, Brighton (14; Chakravarthi Rajkumar, Joanna Breeds). Royal United Hospital, Bath (6; Louise Shaw, Barbara Madigan). Salford Royal Hospital, Salford (16; Jane Molloy). Southampton General Hospital, Southampton (1; Giles Durward). Southend Hospital, Westcliff-on-Sea (26; Paul Guyler). Southern General Hospital, Glasgow (34; Keith Muir, Wilma Smith). St George's Hospital, London (108; Hugh Markus). St Helier Hospital, Carshalton (10; Val Jones). Stepping Hill Hospital, Stockport (4; Shivakumar Krishnamoorthy). Sunderland Royal Hospital, Sunderland (1; Nikhil Majumdar). The Royal Bournemouth Hospital, Bournemouth (15; Damian Jenkinson). The Walton Centre, Liverpool (15; Richard White). Torbay Hospital, Torquay (19; Debs Kelly). University Hospital Aintree, Liverpool (19; Ramesh Durairaj). University Hospital of North Staffordshire, Stoke-on-trent (16; David Wilcock). Wansbeck General Hospital and North Tyneside Hospital, Ashington and North Shields (6; Christopher Price). West Cumberland Hospital, Whitehaven (6; Olu Orugun, Rachel Glover). West Hertfordshire Hospital, Watford (20; David Collas). Western General Hospital, Edinburgh (12; Cathie Sudlow). Western Infirmary, Glasgow (33; Kennedy R. Lees, Jesse Dawson). Wycombe Hospital and Stoke Mandeville, High Wycombe (20; Dennis Briley and Matthew Burn). Yeovil District Hospital, Yeovil (46; Khalid Rashed). York Teaching Hospital, York (1; John Coyle).

## **The Dutch Parelsnoer Institute-Cerebrovascular accident (CVA) Study Group, The Netherlands**

Ewoud J. van Dijk, Department of Neurology, Radboud University Medical Center, Nijmegen, The Netherlands

Peter J. Koudstaal, Department of Neurology, Erasmus University Medical Center, Rotterdam, The Netherlands

Gert-Jan Luijckx, Department of Neurology, Maastricht University Medical Center, Maastricht, The Netherlands

Paul J. Nederkoorn, Department of Neurology, Amsterdam UMC, University of Amsterdam, Amsterdam, The Netherlands

Robert J. van Oostenbrugge, Department of Neurology, Maastricht University Medical Center, Maastricht, The Netherlands

Marieke C. Visser, Department of Neurology, Amsterdam UMC, Vrije Universiteit Amsterdam, Amsterdam, the Netherlands

Marieke J.H. Wermer, Department of Neurology, Leiden University Medical Center, Leiden, the Netherlands

L. Jaap Kappelle, Department of Neurology and Neurosurgery, University Medical Center Utrecht Brain Center, Utrecht University, Utrecht, The Netherlands

## Members of the Stroke Genetics Network (SiGN)

### Administrative:

Steven J. Kittner, MD, MPH (chair; Department of Neurology, University of Maryland School of Medicine and Veterans Affairs Maryland Health Care System, Baltimore, MD, USA); Cameron A. Dell, BS (Department of Neurology, University of Maryland School of Medicine, Baltimore, MD, USA); Dale M. Gamble, MHSc, CCRP (Department of Neurology, Mayo Clinic, Jacksonville, FL, USA); Mary J. Sparks, RN, BSN (Department of Neurology, University of Maryland School of Medicine, Baltimore, MD, USA)

### Steering/PIs of Discovery Studies:

Donna K. Arnett, PhD, MSPH (Department of Epidemiology, School of Public Health, University of Alabama at Birmingham, Birmingham, AL, USA); Oscar Benavente, MD, FRCP (Department of Neurology, University of British Columbia, Vancouver, British Columbia, Canada); John W. Cole, MD, MS (Department of Neurology, University of Maryland School of Medicine and Veterans Affairs Maryland Health Care System, Baltimore, MD, USA); Martin Dichgans, MD (Institute for Stroke and Dementia Research, Klinikum der Universität München, Ludwig-Maximilians University, Munich, Germany); Munich Cluster for Systems Neurology (SyNergy), Munich, Germany); Raji P. Grewal, MD (Neuroscience Institute, Saint Francis Medical Center, School of Health and Medical Sciences, Seton Hall University, South Orange, New Jersey, USA); Christina Jern, MD, PhD (Institute of Biomedicine, the Sahlgrenska Academy at University of Gothenburg, Gothenburg, Sweden); Jordi Jiménez Conde, MD, PhD (Department of Neurology, Neurovascular Research Group (NEUVAS) IMIM-Hospital del Mar (Institut Hospital del Mar d'Investigacions Mèdiques), Universitat Autònoma de Barcelona/DCEXS-Universitat Pompeu Fabra, Barcelona, Spain); Julie A. Johnson, PharmD (Department of Pharmacotherapy and Translational Research and Center for Pharmacogenomics, College of Pharmacy, University of Florida, Gainesville, FL, USA; Division of Cardiovascular Medicine, College of Medicine, University of Florida, Gainesville, FL, USA); Jin-Moo Lee, MD, PhD (Stroke Center, Department of Neurology, Washington University School of Medicine, St. Louis, MO, USA); Christopher Levi, MBBS, BMed Sci, FRACP (John Hunter Hospital, Hunter Medical Research Institute and University of Newcastle, NSW, Australia); Arne Lindgren, MD PhD (Department of Clinical Sciences Lund, Neurology, Lund University, Lund, Sweden; Department of Neurology and Rehabilitation Medicine, Neurology, Skåne, University Hospital, Lund, Sweden); Hugh S. Markus, DM (Department of Clinical Neurosciences, University of Cambridge, Cambridge, UK); Olle Melander, MD, PhD (Lund University, Department of Clinical Sciences, Malmö University Hospital, Malmö, Sweden); James F. Meschia, MD (Department of Neurology, Mayo Clinic, Jacksonville, FL, USA); Kathryn Rexrode, MD, MPH (Brigham and Women's Hospital, Boston, MA, USA); Jonathan Rosand, MD, MSc (Program in Medical and Population Genetics, Broad Institute of MIT and Harvard, Cambridge MA, USA; Department of Neurology and Center for Human Genetic Research, Massachusetts General Hospital, Boston, MA, USA; Department of Neurology, Harvard Medical School, Boston, MA, USA);

Peter M. Rothwell, FMedSci (Stroke Prevention Research Unit, Nuffield Department of Clinical Neurosciences, University of Oxford, John Radcliffe Hospital, Oxford, UK);

Tatjana Rundek, MD, PhD, FANA (Department of Neurology, Miller School of Medicine, University of Miami, Miami, FL, USA); Ralph L. Sacco, MD, MS, FAHA, FAAN, FANA (Department of Neurology, Miller School of Medicine, University of Miami, Miami, FL, USA); Reinhold Schmidt, MD (Department of Neurology, Clinical Division of Neurogeriatrics, Medical University Graz, Graz, Austria); Pankaj Sharma, MD, PhD, FRCP (Institute of Cardiovascular Research, Royal Holloway University of London (ICR2UL), Egham, UK; St Peter's and Ashford Hospitals, UK); Agnieszka Slowik, MD, PhD (Department of Neurology, Jagiellonian University Medical College, Krakow, Poland); Cathie LM Sudlow, DPhil, FRCP(E) (Centre for Clinical Brain Sciences & Institute of Genomic and Molecular Medicine, University of Edinburgh, UK); Vincent Thijs, MD, PhD (KU Leuven - University of Leuven, Department of Neurosciences, Experimental Neurology and Leuven Research Institute for Neuroscience and Disease (LIND), Leuven, Belgium; VIB, Vesalius Research Center, Laboratory of Neurobiology, Leuven, Belgium;

University Hospitals Leuven, Department of Neurology, Leuven, Belgium); Sylvia Wassertheil-Smoller, PhD (Department of Epidemiology and Population Health, Albert Einstein College of Medicine, Bronx, NY, USA);

Daniel Woo, MD, MS (University of Cincinnati College of Medicine, Cincinnati, OH, USA); Bradford B. Worrall, MD, MSc (Departments of Neurology and Public Health Sciences, University of Virginia, Charlottesville, VA, USA)

#### PIs of Control Studies:

Rebecca D. Jackson, MD (Division of Endocrinology, Diabetes and Metabolism, Department of Internal Medicine and the Center for Clinical and Translational Science, The Ohio State University, Columbus, OH); Martina Müller-Nurasyid, PhD (Institute of Genetic Epidemiology, Helmholtz Zentrum München – Germany; Research Center for Environmental Health, Neuherberg, Germany; Department of Medicine I, Ludwig-Maximilians-University Munich, Munich, Germany; DZHK (German Centre for Cardiovascular Research), partner site Munich; Heart Alliance, Munich, Germany);

Mike A. Nalls, PhD (Laboratory of Neurogenetics, National Institute on Aging, National Institutes of Health, Bethesda, MD, USA);

Marta Ribasés, PhD, BSc (Psychiatric Genetics Unit, Group of Psychiatry, Mental Health and Addictions, Vall d’Hebron Research Institute (VHIR), Universitat Autònoma de Barcelona, Barcelona, Spain; Department of Psychiatry, Hospital Universitari Vall d’Hebron, Barcelona, Spain; Biomedical Network Research Centre on Mental Health (CIBERSAM), Barcelona, Spain); David R. Weir, PhD (Survey Research Center, University of Michigan, Ann Arbor, MI, USA)

#### Data Management:

Patrick F. McArdle, PhD (chair; Department of Medicine and Program for Personalized and Genomic Medicine, University of Maryland School of Medicine, Baltimore, MD);

Tushar Dave, MS (Department of Medicine and Program for Personalized and Genomic Medicine, University of Maryland School of Medicine, Baltimore, MD, USA)

#### Analysis:

Braxton D. Mitchell, PhD, MPH (chair; Division of Endocrinology, Diabetes and Nutrition, University of Maryland School of Medicine, Baltimore, MD, USA; Geriatric Research and Education Clinical Center, Veterans Administration Medical Center, Baltimore, MD, USA); Yu-Ching Cheng, PhD (Department of Medicine, University of Maryland School of Medicine, Baltimore, MD, USA);

Paul I.W. de Bakker, PhD (Department of Medical Genetics, University Medical Center Utrecht, Utrecht, The Netherlands; Department of Epidemiology, University Medical Center Utrecht, Utrecht, The Netherlands);

Myriam Fornage, PhD (Institute of Molecular Medicine, University of Texas Health Science Center at Houston, Houston, TX, USA);

Cathy C. Laurie, PhD (Department of Biostatistics, University of Washington, Seattle, WA, USA);

Ani Manichaikul, PhD (Center for Public Health Genomics, Biostatistics Section, Department for Public Health Sciences, University of Virginia, Charlottesville, VA, USA);

Jeffrey R. O’Connell, DPhil (Division of Endocrinology, Diabetes and Nutrition, University of Maryland School of Medicine, Baltimore, MD, USA); Sara L. Pulit, BA (Department of Medical Genetics, Institute for Molecular Medicine, University Medical Center Utrecht, Utrecht, The Netherlands);

Stephen S. Rich, PhD (Center for Public Health Genomics, University of Virginia, Charlottesville, VA, USA); Quenna Wong, MS (Department of Biostatistics, University of Washington, Seattle, WA, USA); Huichun Xu, MD, PhD (Department of Medicine, University of Maryland School of Medicine, Baltimore, MD, USA)

#### Phenotype:

James F. Meschia, MD (co-chair; Department of Neurology, Mayo Clinic, Jacksonville, FL, USA);

Bradford B. Worrall, MD, MSc (co-chair; Departments of Neurology and Public Health Sciences,

University of Virginia, Charlottesville, VA, USA);

Hakan Ay, MD (AA Martinos Center for Biomedical Imaging, Department of Radiology, Massachusetts General Hospital, Harvard Medical School, Boston, MA, USA; Stroke Service, Department of Neurology, Massachusetts General Hospital, Harvard Medical School, Boston, MA, USA);

Robert D. Brown Jr., MD, MPH (Department of Neurology, Mayo Clinic, Rochester, MN, USA)

#### Imaging:

Jonathan Rosand, MD, MSc (chair; Program in Medical and Population Genetics, Broad Institute of MIT and Harvard, Cambridge MA, USA; Department of Neurology and Center for Human Genetic Research, Massachusetts General Hospital, Boston, MA, USA; Department of Neurology, Harvard Medical School, Boston, MA, USA);

Natalia S. Rost, MD, MPH (Stroke Division, Department of Neurology, Massachusetts General Hospital, Harvard Medical School, Boston, MA 02114);

Ona Wu, PhD (Athinoula A. Martinos Center for Biomedical Imaging, Department of Radiology, Massachusetts General Hospital, Charlestown, MA, USA; Department of Radiology, Harvard Medical School, Boston, MA, USA)

#### Publication:

Kathryn Rexrode, MD, MPH (chair Brigham and Women's Hospital, Boston, MA, USA); Tatjana Rundek, MD, PhD, FANA (prior chair; Department of Neurology, Miller School of Medicine, University of Miami, Miami, FL, USA);

Agnieszka Slowik, MD, PhD (prior co-chair; Department of Neurology, Jagiellonian University Medical College, Krakow, Poland); Hakan Ay, MD (AA Martinos Center for Biomedical Imaging, Department of Radiology, Massachusetts General Hospital, Harvard Medical School, Boston, MA, USA; Stroke Service, Department of Neurology, Massachusetts General Hospital, Harvard Medical School, Boston, MA, USA);

Oscar R. Benavente, MD, FRCP (Department of Neurology, University of British Columbia, Vancouver, British Columbia, Canada); Steve Bevan, PhD (Department of Clinical Neurosciences, University of Cambridge, Cambridge, UK); Katrina Gwinn, MD (National Institute of Neurological Disorders and Stroke, National Institutes of Health, Bethesda, MD, USA);

Steven J. Kittner, MD, MPH (chair; Department of Neurology, University of Maryland School of Medicine and Veterans Affairs Maryland Health Care System, Baltimore, MD, USA); Jin-Moo Lee, MD, PhD (Stroke Center, Department of Neurology, Washington University School of

Medicine, St. Louis, MO, USA);

Patrick F. McArdle, PhD (Department of Medicine and Program for Personalized and Genomic Medicine, University of Maryland School of Medicine, Baltimore, MD);

James F. Meschia, MD (Department of Neurology, Mayo Clinic, Jacksonville, FL, USA); Braxton D. Mitchell, PhD, MPH (Division of Endocrinology, Diabetes and Nutrition, University of Maryland School of Medicine, Baltimore, MD, USA; Geriatric Research and Education Clinical Center, Veterans Administration Medical Center, Baltimore, MD, USA); Jonathan Rosand, MD, MSc (Program in Medical and Population Genetics, Broad Institute of MIT and Harvard, Cambridge MA, USA; Department of Neurology and Center for Human Genetic Research,

Massachusetts General Hospital, Boston, MA, USA; Department of Neurology, Harvard Medical School, Boston, MA, USA);

Sylvia Wassertheil-Smoller, PhD (Department of Epidemiology and Population Health, Albert Einstein College of Medicine, Bronx, NY, USA);

Daniel Woo, MD, MS (University of Cincinnati College of Medicine, Cincinnati, OH, USA); Bradford B. Worrall, MD, MSc (Departments of Neurology and Public Health Sciences, University of Virginia, Charlottesville, VA, USA)

#### CIDR:

Kimberly F. Doheny, PhD (Center for Inherited Disease Research, Institute of Genetic Medicine, Johns Hopkins School of Medicine, Baltimore, MD)



NINDS staff:

Roderick Corriveau, PhD (National Institutes of Health, Bethesda, MD, USA);

Katrina Gwinn, MD (National Institute of Neurological Disorders and Stroke, National Institutes of Health, Bethesda, MD, USA)

## Membership of The International Stroke Genetics Consortium

| Full Name          | Country     | Institution                                                               | Department                                                | City                |
|--------------------|-------------|---------------------------------------------------------------------------|-----------------------------------------------------------|---------------------|
| Joan Montaner      | Spain       | Universitat Autònoma de Barcelona, Vall d'Hebron Institute of Research    | Neurovascular Research Laboratory                         | Barcelona           |
| Allard Hauer       | Netherlands | University Medical Center Utrecht, Brain Center Rudolf Magnus             | Department of Neurology and Neurosurgery                  | Utrecht             |
| Alessandro Biffi   | USA         | Massachusetts General Hospital                                            | Division of Behavioral Neurology, Department of Neurology | Boston, MA          |
| Adam DeHavenon     | USA         | University of Utah                                                        | Department of Neurology                                   | Salt Lake City, UT  |
| Alessandra Granata | UK          | University of Cambridge                                                   | Department of Clinical Neurosciences                      | Cambridge           |
| Anne-Katrin Giese  | USA         | Massachusetts General Hospital, Harvard Medical School                    | Department of Neurology                                   | Boston, MA          |
| Alessandro Pezzini | Italy       | University of Brescia, Neurology Clinic                                   | Department of Clinical and Experimental Sciences          | Brescia             |
| Alexis Simpkins    | USA         | University of Florida                                                     | Department of Neurology                                   | Gainesville, FL     |
| Andreea Ilinca     | Sweden      | Lund University                                                           | Neurology                                                 | Lund                |
| Aniket Mishra      | France      | INSERM U1219 Bordeaux Population Health Research Center, Bordeaux, France |                                                           |                     |
| anna bersano       | Italy       | IRCCS Foundation C. Besta Neurological Institute                          | Cerebrovascular Unit                                      | Milan               |
| Anna Drazyk        | UK          | University of Cambridge                                                   | Department of Clinical Neurosciences                      | Cambridge           |
| Annie Pedersen     | Sweden      | Sahlgrenska Academy at University of Gothenburg                           | Department of Pathology and Genetics                      | Gothenburg          |
| Antonio Arauz      | Mexico      | Instituto Nacional de Neurologia y Neurocirugia, Manuel Velasco Suarez    | Stroke Clinic                                             | Mexico City         |
| Alex Reiner        | USA         | University of Washington                                                  | Department of Epidemiology                                | Seattle, WA         |
| Arne Lindgren      | Sweden      | Lund University                                                           | Department of Clinical Sciences Lund, Neurology           | Lund                |
| Andrew Southerland | USA         | University of Virginia                                                    | Departments of Neurology and Public Health Sciences       | Charlottesville, VA |
| Alexis N. Simpkins | USA         |                                                                           |                                                           |                     |
| Jose Florez        | USA         | Massachusetts General Hospital                                            | Center for Human Genetic Research, MGH                    | Boston, MA          |

|                       |           |                                                                                     |                                                                                                           |                     |
|-----------------------|-----------|-------------------------------------------------------------------------------------|-----------------------------------------------------------------------------------------------------------|---------------------|
| Bradford Worrall      | USA       | University of Virginia School of Medicine                                           | Departments of Neurology and Public Health Sciences                                                       | Charlottesville, VA |
| Silvia Bione          | Italy     | Institute of Molecular Genetics-National Research Council                           | Computational Biology Unit                                                                                | Pavia               |
| Bjorn Hansen          | Sweden    | Lund University                                                                     | Department of Clinical Sciences Lund, Neurology                                                           | Lund                |
| Braxton Mitchell      | USA       | University of Maryland School of Medicine                                           | Department of Medicine                                                                                    | Baltimore, MD       |
| Bo Norrving           | Sweden    | Lund University                                                                     | Sahlgrenska Academy at University of Gothenburg                                                           | Lund                |
| Bernard Chan          | Singapore | National University Hospital                                                        |                                                                                                           |                     |
| Robert Brown          | USA       | Mayo Clinic                                                                         | Department of Neurology                                                                                   | Rochester, MN       |
| Tan Wei Liang Byorn   | Singapore | Nanyang Technological University                                                    | Lee Kong Chian School of Medicine                                                                         | Singapore           |
| caspar Grond-Ginsbach | Germany   | Heidelberg University Hospital                                                      | Department of Neurology                                                                                   | Heidelberg          |
| Catherine Sudlow      | UK        | University of Edinburgh                                                             | Department of Neurology                                                                                   | Edinburgh           |
| Cathryn Lewis         | UK        | King's College London                                                               | Department of Medical and Molecular Genetics                                                              | London              |
| Caty Carrera          | Spain     | Universitat Autònoma de Barcelona, Vall d'Hebrón Hospital                           | Neurovascular Research Laboratory, Vall d'Hebrón Institut of Research, Neurology and Medicine Departments |                     |
| Carlos Cruchaga       | USA       | Washington University School of Medicine                                            | Department of Psychiatry, The Hope Center Program on Protein Aggregation and Neurodegeneration (HPAN)     | St. Louis, MO       |
| Chris Anderson        | USA       | Massachusetts General Hospital (MGH)                                                | Center for Genomic Medicine                                                                               | Boston, MA          |
| Chaur-Jong Hu         | Taiwan    |                                                                                     |                                                                                                           |                     |
| Chloé Sarnowski       | USA       | Boston University                                                                   | Department of Biostatistics                                                                               | Boston              |
| Chris Riley           | USA       | American Heart Association                                                          | Institute for Precision Cardiovascular Medicine Stroke Genetics                                           |                     |
| Christina Jern        | Sweden    | The Sahlgrenska Academy at University of Gothenburg, Institute of Biomedicine       | Department of Pathology and Genetics                                                                      | Gothenburg          |
| Christopher Levi      | Australia | John Hunter Hospital, Hunter Medical Research Institute and University of Newcastle |                                                                                                           | Newcastle           |
| Christina Kourkoulis  | USA       | Massachusetts General Hospital                                                      | Department of Neurology                                                                                   | Boston, MA          |

|                           |             |                                                                         |                                                                                 |                     |
|---------------------------|-------------|-------------------------------------------------------------------------|---------------------------------------------------------------------------------|---------------------|
| Carl Langefeld            | USA         | Wake Forest School of Medicine                                          | Center for Public Health Genomics and Department of Biostatistical Sciences     | Winston-Salem, NC   |
| Chaeyoung Lee             | Korea       | Soongsil University                                                     | Department of Bioinformatics and Life Science                                   | Seoul               |
| Caitrin Wheeler McDonough | USA         | University of Florida                                                   | Department of Pharmacotherapy and Translational Research                        | Gainesville, FL     |
| Chia-Ling Phuah           | USA         | Center for Human Genetic Research, Massachusetts General Hospital (MGH) |                                                                                 | Boston, MA          |
| Christopher Chen          | Singapore   | National University of Singapore                                        | Department of Pharmacology                                                      | Singapore           |
| Carolina Soriano          | Spain       | IMIM-Hospital del Mar                                                   | Department of Neurology, Neurovascular Research Group                           | Barcelona           |
| Dina Vojinovic            | Netherlands | Erasmus MC, University Medical Center Rotterdam                         | Department of Epidemiology                                                      | Rotterdam           |
| Daniel Strbian            | Finland     | Helsinki University Hospital                                            | Department of Neurology                                                         | Helsinki            |
| Daniel Woo                | USA         | University of Cincinnati College of Medicine                            |                                                                                 | Cincinnati, OH      |
| David Tregouet            | France      | Sorbonne Universités, UPMC Univ. Paris 06, INSERM, UMR_S 1166           | Team Genomics and Pathophysiology of Cardiovascular Diseases                    | Paris               |
| David Liebeskind          | USA         | University of California Los Angeles                                    | Department of Neurology                                                         | Los Angeles, CA     |
| Daniel Chasman            | USA         | Brigham and Women's Hospital                                            | Division of Preventive Medicine                                                 | Boston, MA          |
| Raj Dhar                  | USA         | Washington University School of Medicine                                | Department of Neurology                                                         | St. Louis, MO       |
| Dipender Gill             | UK          | Imperial College London                                                 | Centre for Pharmacology and Therapeutics                                        | London              |
| Debra Owens               | USA         | University of Virginia Children's Hospital                              | Newborn Intensive Care Units                                                    | Charlottesville, VA |
| Amanda Donatti            | Brazil      | University of Campinas, UNICAMP                                         | School of Medical Sciences, FCM                                                 | São Paulo           |
| Dorothea Pfeiffer         | Germany     | Hiedelberg University Hospital                                          | Department of Neurology                                                         | Heidelberg          |
| Kameshwar Prasad          | India       | All India Institute of Medical Sciences (AIIMS)                         | Department of Neurology and Stroke Unit; and Director of Clinical Epidemiology, | New Delhi           |
| Thomas Leung              | Hong-Kong   | The Chinese University of Hong Kong                                     | Division of Neurology, Department of Medicine and Therapeutics                  | Hong-Kong           |
| Eva Giralt                | Spain       | Parc de Salut Mar                                                       |                                                                                 | Barcelona           |
| Eric Harshfield           | UK          |                                                                         |                                                                                 |                     |

|                      |             |                                                     |                                                                                                        |               |
|----------------------|-------------|-----------------------------------------------------|--------------------------------------------------------------------------------------------------------|---------------|
| Elsa Valdés Márquez  | UK          | University of Oxford                                | CTSU-Clinical Trial Service Unit and Epidemiological Studies Unit                                      | Oxford        |
| Erik Lorentzen       | Sweden      | University of Gothenburg                            | Bioinformatics Core Facility                                                                           | Gothenburg    |
| Farrah Mateen        | USA         | Massachusetts General Hospital                      | Department of Neurology                                                                                | Boston, MA    |
| Foad Abd-Allah       | Egypt       | Cairo University                                    | Department of Neurology and Stroke Medicine                                                            | Cairo         |
| Frank-Erik de Leeuw  | Netherlands | Radboud University Medical Center                   | Department of Neurology                                                                                | Nijmegen      |
| Gabriel Rinkel       | Netherlands | UMC Utrecht, Brain Center Rudolf Magnus             | Department of Neurology and Neurosurgery                                                               | Utrecht       |
| Ganesh Chauhan       | India       | Indian Institute of Science                         | Centre for Brain Research                                                                              | Bangalore     |
| Matthew Walters      | UK          | University of Glasgow                               | School of Medicine, Dentistry and Nursing                                                              | Glasgow       |
| Guido Falcone        | USA         | Yale University School of Medicine                  | Department of Neurology                                                                                | New Haven, CT |
| Giorgio Boncoraglio  | Italy       | Fondazione IRCCS Istituto Neurologico "Carlo Besta" | Department of Cerebrovascular Diseases                                                                 | Milan         |
| Hideaki Suzuki       | Japan       |                                                     |                                                                                                        |               |
| Hanne Sallinen       | Finland     | Helsinki University Hospital                        | Department of Neurology                                                                                | Helsinki      |
| Hakan Ay             | USA         | Massachusetts General Hospital                      | Department of Neurology                                                                                | Boston, MA    |
| Laura Heitsch        | USA         | Washington University School of Medicine            | Department of Neurology, Radiology, and Biomedical Engineering                                         | St. Louis, MO |
| Hyacinth I Hyacinth  | USA         | Emory University School of Medicine                 | Aflac Cancer and Blood Disorder Center, Department of Pediatrics                                       | Atlanta, GA   |
| Hirofumi Nakatomi    | Japan       |                                                     |                                                                                                        |               |
| Atsushi Hozawa       | Japan       |                                                     |                                                                                                        |               |
| Hugh Markus          | UK          | University of Cambridge                             | Stroke Research Group, Division of Clinical Neurosciences,                                             | Cambridge     |
| Chung Hsu            | Taiwan      | China Medical University                            |                                                                                                        |               |
| Hugo Javier Aparicio | USA         | Boston University School of Medicine                | Department of Neurology                                                                                | Boston, MA    |
| Huichun Xu           | USA         | School of Medicine, University of Maryland          | Medicine department                                                                                    | Baltimore     |
| Iain Turnbull        | UK          | University of Oxford                                | Clinical Trial Service Unit and Epidemiological Studies Unit, Nuffield Department of Population Health | Oxford        |

|                                 |             |                                                                           |                                                                                                                              |                       |
|---------------------------------|-------------|---------------------------------------------------------------------------|------------------------------------------------------------------------------------------------------------------------------|-----------------------|
| Laura Garcia<br>Ibanez          | USA         | University of<br>Columbia                                                 | Institute for Cancer Genetics                                                                                                | New York              |
| Iscia Cendes                    | Brazil      | Universidade Estadual<br>de Campinas,<br>Faculdade de Ciências<br>Médicas | Molecular Genetics<br>Laboratory                                                                                             | Campinas              |
| Masafumi<br>Ihara               | Japan       | National Cerebral and<br>Cardiovascular Center                            | Department of Neurology                                                                                                      | Osaka                 |
| I-Hui Lee                       | Taiwan      |                                                                           |                                                                                                                              |                       |
| Ynte Ruigrok                    | Netherlands | University Medical<br>Center Utrecht, Brain<br>Center Rudolf Magnus       | Department of Neurology and<br>Neurosurgery                                                                                  | Utrecht               |
| Ioana<br>Cotlatciuc             | UK          | University of London                                                      | Institute of Cardiovascular<br>Research Royal Holloway                                                                       | London                |
| Iona Millwood                   | UK          | University of Oxford                                                      | Nuffield Department of<br>Population Health                                                                                  | Oxford                |
| Ryan Irvin                      | USA         | University of Alabama<br>at Birmingham                                    | Department of Epidemiology                                                                                                   | Birmingham,<br>AL     |
| Israel<br>Fernandez-<br>Cadenas | Spain       | Universitat Autònoma<br>de Barcelona, Vall<br>d'Hebrón Hospital           | Neurovascular Research<br>Laboratory, Vall d'Hebron<br>Institut of Research,<br>Neurology and Medicine<br>Departments        | Barcelona             |
| Juan José<br>Martín             | Argentina   | Sanatorio Allende                                                         | Department of Neurology                                                                                                      | Cordoba               |
| Jane Maguire                    | Australia   | University of<br>Technology Sydney                                        | Faculty of Health                                                                                                            | Ultimo                |
| Janika Korv                     | Estonia     | University of Tartu                                                       | Department of Neurology and<br>Neurosurgery                                                                                  | Tartu                 |
| John Cole                       | USA         | University of<br>Maryland School of<br>Medicine and<br>Baltimore VAMC     | Department of Neurology                                                                                                      | Baltimore,<br>MD      |
| Jill Stewart                    | USA         | University of South<br>Carolina                                           | Department of Exercise<br>Science                                                                                            | Columbia,<br>SC       |
| John Danesh                     | UK          | University of<br>Cambridge                                                | MRC/BHF Cardiovascular<br>Epidemiology Unit,<br>Department of Public Health<br>and Primary Care,                             | Cambridge             |
| James E Faber                   | USA         | University of North<br>Carolina                                           | Cell Biology and Physiology                                                                                                  | Chapel Hill           |
| Jemma<br>Hopewell               | UK          | University of Oxford                                                      | Clinical Trial Service Unit and<br>Epidemiological Studies Unit,<br>Nuffield Department of<br>Population Health<br>Neurology | Oxford                |
| Jennifer<br>Majersik            | USA         | University of Utah                                                        |                                                                                                                              | Salt Lake<br>City, UT |
| Jim Koenig                      | USA         | NINDS                                                                     | Division of Neuroscience,<br>Stroke Program in the Neural<br>Environment                                                     | Bethesda,<br>MA       |
| Jordi Jimenez-<br>Conde         | Spain       | IMIM - Hospital del<br>Mar                                                | Neurovascular Research<br>Group (NEUVAS). Neurology<br>Department.                                                           | Barcelona             |

|                              |             |                                                                                           |                                                                                        |                |
|------------------------------|-------------|-------------------------------------------------------------------------------------------|----------------------------------------------------------------------------------------|----------------|
| Joanna Howson                | UK          | University of Cambridge                                                                   | MRC/BHF Cardiovascular Epidemiology Unit, Department of Public Health and Primary Care | Cambridge      |
| Joanna Wardlaw               | UK          | University of Edinburgh                                                                   | Neuroimaging Sciences                                                                  | Edinburgh      |
| Johan Wasselius              | Sweden      | Lund University                                                                           | Department of Clinical Sciences Malmö                                                  | Malmö          |
| John Attia                   | Australia   | University of Newcastle                                                                   | School of Medicine and Public Health                                                   | New Lambton    |
| Joseph Broderick             | USA         | University of Cincinnati                                                                  | Gardner Neuroscience Institute, Comprehensive Stroke Center                            | Cincinnati, OH |
| Josh Bis                     | USA         | University of Washington                                                                  | Cardiovascular Health Research Unit, Department of Medicine                            | Seattle, WA    |
| Jonathan Rosand              | USA         | Massachusetts General Hospital                                                            | Department of Neurology                                                                | Boston, MA     |
| Joonhng Sung<br>Jer-Yuarn Wu | Taiwan      | Institute of Biomedical Sciences, Academia Sinica                                         |                                                                                        | Taipei         |
| Karin Klijns                 | Netherlands | Radboud University Medical Centre, Donders Institute for Brain, Cognition and Behaviour   | Department of Neurology                                                                | Nijmegen       |
| Katarina Jood                | Sweden      | Institute of Neuroscience and Physiology, Sahlgrenska Academy at University of Gothenburg | Department of Clinical Neuroscience                                                    | Gothenburg     |
| Katrina Gwinn                | USA         | National Institutes of Health                                                             | National Institute of Neurological Disorders and Stroke                                | Bethesda, MD   |
| Katherine Crawford           | USA         | Massachusetts General Hospital                                                            | Center for Genomic Medicine                                                            | Boston, MA     |
| Kevin Sheth                  | USA         | Yale School of Medicine                                                                   | Department of Neurology                                                                | New Haven, CT  |
| Gyeong-Moon Kim              | Korea       | Samsung Medical Center, Sungkyunkwan University School of Medicine                        | Department of Neurology                                                                | Seoul          |
| Helen Kim                    | USA         | Université de Californie                                                                  | Institute for Human Genetics, The Center for Cerebrovascular Research (CCR)            | San Francisco  |
| Kathleen Donahue             | USA         | Massachusetts General Hospital                                                            | J. Philip Kistler Stroke Research Center                                               | Boston, MA     |

|                         |             |                                                                                           |                                                                                                       |                    |
|-------------------------|-------------|-------------------------------------------------------------------------------------------|-------------------------------------------------------------------------------------------------------|--------------------|
| Jan Konrad              | USA         | Washington University, School of Medicine                                                 | Department of Psychiatry, The Hope Center Program on Protein Aggregation and Neurodegeneration (HPAN) | St. Louis, MO      |
| Kathryn Rexrode         | USA         | Brigham and Women's Hospital                                                              | Department of Medicine                                                                                | Boston             |
| Kristiina Rannikmae     | UK          | University of Edinburgh                                                                   | Department of Neurology                                                                               | Edinburgh          |
| Kwang-Yeol Park         | Korea       |                                                                                           |                                                                                                       | Seoul, South Korea |
| Kazuo Washida           | Japan       |                                                                                           |                                                                                                       |                    |
| Martin Stenman          | Sweden      | Lund University                                                                           | Geriatric Medicine                                                                                    | Lund               |
| Marcos Christiano Lange | Brazil      | Federal University of Parana                                                              | Clinical Hospital                                                                                     |                    |
| Jin-Moo Lee             | USA         | Washington University School of Medicine                                                  | Department of Neurology, Radiology, and Biomedical Engineering                                        | St. Louis, MO      |
| Leslie Lange            | USA         | University of Colorado Denver - Anschutz Medical Campus                                   |                                                                                                       | Denver, CO         |
| Saskia Lesnik Oberstein | Netherlands | Leiden University Medical Center                                                          | Department of Clinical Genetics                                                                       | Leiden             |
| Liisa Tomppo            | Finland     | Helsinki University Hospital                                                              | Department of Neurology                                                                               | Helsinki           |
| Guiyou Liu              | China       | Harbin Institute of Technology                                                            | School of Life Science and Technology                                                                 | Harbin             |
| Elizabeth Holliday      | Australia   | Hunter Medical Research Institute                                                         | Public Health Stream                                                                                  | New Lambton        |
| Loes Rutten-Jacobs      | UK          | University of Cambridge, Division of Clinical Neurosciences                               | Stroke Research Group                                                                                 | Cambridge          |
| Lukas Holmegaard        | Sweden      | Institute of Neuroscience and Physiology, Sahlgrenska Academy at University of Gothenburg | Department of Clinical Neuroscience                                                                   | Gothenburg         |
| Mark Bakker             | Netherlands | University Medical Center Utrecht                                                         |                                                                                                       | Utrecht            |
| Maja Olsson             | Sweden      | Sahlgrenska Academy at University of Gothenburg                                           | Department of Medical and Clinical Genetics, Institute of Biomedicine                                 | Gothenburg         |
| Michelangelo Mancuso    | Italy       | University of Pisa                                                                        | Department of Neurology                                                                               | Pisa               |
| Martin Dichgans         | Germany     | Ludwig-Maximilians-University, Klinikum der Universität München                           | Institute for Stroke and Dementia Research                                                            | Munich             |
| Martin Söderholm        | Sweden      | University of Gothenburg                                                                  | Bioinformatics Core Facility                                                                          | Gothenburg         |



|                       |            |                                                                                                  |                                                                           |                     |
|-----------------------|------------|--------------------------------------------------------------------------------------------------|---------------------------------------------------------------------------|---------------------|
| Martina Olsson        | Sweden     | University of Gothenburg                                                                         |                                                                           | Gothenburg          |
| Matthew Alexander     | USA        | University of Utah School of Medicine                                                            | Radiology and Imaging Sciences                                            | Salt Lake City, UT  |
| Mattias Drake         | Sweden     | Lund University                                                                                  | Diagnostic Radiology                                                      | Lund                |
| Mayowa Owolabi        | Nigeria    | University College Hospital                                                                      | Department of Neurology                                                   | Ibadan              |
| James Meschia         | USA        | Mayo Clinic                                                                                      | Department of Neurology                                                   | Jacksonville        |
| Mike Chong            | Canada     | McMaster University                                                                              | Population Health Research Institute                                      | Hamilton            |
| Michael James         | USA        | Duke University                                                                                  | Brain Injury Translational Research Center                                | Durham              |
| Michiaki Kubo         | Japan      | RIKEN Center for Integrative Medical Sciences                                                    |                                                                           | Yokohama            |
| Miguel Barboza        | Costa Rica | Hospital Rafael A. Calderon Guardia                                                              | Department of Neurology                                                   | San Jose            |
| Michele Sale          | USA        | University of Virginia                                                                           | Center for Public Health Genomics                                         | Charlottesville, VA |
| Markus Schirmer       | USA        | Massachusetts General Hospital and Harvard Medical School                                        | Department of Neurology, J. Philip Kistler Stroke Research Centre         | Boston              |
| Mitchell Elkind       | USA        | Columbia University                                                                              | Department of Neurology                                                   | New York, NY        |
| Magdy Selim           | USA        | Harvard Medical School                                                                           | Beth Israel Deaconess Medical Center                                      | Boston              |
| Matthew Traylor       | UK         | University of Cambridge                                                                          | Stroke Research Group, Division of Clinical Neurosciences                 | Cambridge           |
| Murali Sargurupremraj | France     | University of Bordeaux                                                                           | INSERM U1219 Bordeaux Population Health Research Center                   | Bordeaux            |
| Myriam Fornage        | USA        | University of Texas Health Science Center at Houston                                             | Brown Foundation Institute of Molecular Medicine // Human Genetics Center | Houston, TX         |
| Nuria Torres          | Spain      | Hospital Mútua de Terrassa, Fundació Docència i Recerca Mútua Terrassa                           | Stroke Pharmacogenomics and Genetics                                      | Terrassa            |
| Jong-Won Chung        | USA        | Samsung Medical Center, Sungkyunkwan University School of Medicine                               | Department of Neurology                                                   | Seoul               |
| Toshiharu Ninomiya    | Japan      | Kyushu University, Graduate School of Medical Sciences                                           | Department of Epidemiology and Public Health                              | Fukuoka             |
| Natalia Rost          | USA        | Department of Neurology, Massachusetts General Hospital, Harvard Medical School, Boston, MA, USA |                                                                           | Boston, MA          |

|                   |             |                                                                                |                                                                                      |               |
|-------------------|-------------|--------------------------------------------------------------------------------|--------------------------------------------------------------------------------------|---------------|
| Olle Melander     | sweden      | Lund University                                                                | Department of Clinical Sciences                                                      | Lund          |
| Ona Wu            | USA         | Massachusetts General Hospital and Harvard Medical School                      | Department of Neurology, JPK Stroke Research Center                                  | Boston, MA    |
| Pankaj Sharma     | UK          | Royal Holloway University of London                                            | Institute of Cardiovascular Research                                                 | London        |
| Eugenio Parati    | Italy       | Fondazione IRCCS Istituto Neurologico "C. Besta", Cerebrovascular Disease Unit | Laboratory of Cellular Neurobiology                                                  | Milan         |
| Guillaume Pare    | Canada      | McMaster University                                                            | Population Health Research Institute                                                 | Hamilton      |
| Joanna Pera       | Poland      | Jagiellonian University Medical College                                        | Department of Neurology                                                              | Krakow        |
| Petrea Frid       | Sweden      | Skåne University Hospital, Lund university                                     | Critical Care Neurology                                                              | Malmö         |
| Paulo Franca      | Brazil      | Universidade da Região de Joinville – Univille                                 | Department of Medicine                                                               | Joinville     |
| Phil Clatworthy   | UK          | University of Bristol                                                          | Stroke Association                                                                   | Bristol, UK   |
| Philippe Bijlenga | Switzerland | Geneva University Hospital                                                     | Departement des neurosciences cliniques, Clinique de neurochirurgie                  | Geneva        |
| Patrick McArdle   | USA         | University of Maryland School of Medicine                                      | Division of Endocrinology, Diabetes and Nutrition                                    | Baltimore, MD |
| Patricia Musolino | USA         | Massachusetts General Hospital                                                 |                                                                                      |               |
| Paul Nyquist      | USA         | Johns Hopkins Medicine                                                         | Department of Anesthesiology and Critical Care Medicine                              | Baltimore, MD |
| Polina Golland    | USA         | Massachusetts Institute of Technology                                          | The Computer Science and Artificial Intelligence Laboratory                          | Cambridge, MA |
| Bruce Psaty       | USA         | University of Washington                                                       | Cardiovascular Health Research Unit, Department of Medicine                          | Seattle, WA   |
| Qiong Yang        | USA         | Boston University School of Public Health                                      |                                                                                      | Boston        |
| Reecha Sofat      | UK          | University College London                                                      | Metabolism & Experimental Therapeutics, Div of Medicine, Faculty of Medical Sciences | London        |
| Rainer Malik      | Germany     | Ludwig-Maximilians-University, Klinikum der Universität München                | Institute for Stroke and Dementia Research                                           | Munich        |

|                        |             |                                                                |                                                                                                        |                  |
|------------------------|-------------|----------------------------------------------------------------|--------------------------------------------------------------------------------------------------------|------------------|
| Ramin Zand             | USA         | Geisinger Health System                                        | Department of Neuroscience                                                                             | Danville         |
| Richard Choy           | Hong-Kong   | The Chinese University of Hong Kong                            | Department of Obstetrics and Gynecology                                                                | Hong-Kong        |
| Riina Vibo             | Estonia     | University of Tartu                                            | Department of Neurology and Neurosurgery                                                               | Tartu            |
| Roberta Carriero       | Italy       | Humanitas Clinical Institute                                   | Inflammation and immunology laboratory                                                                 | Pavia            |
| Robin Lemmens          | Belgium     | KU Leuven – University of Leuven                               | Department of Neurosciences, Experimental Neurology                                                    | Leuven           |
| Robin Walters          | UK          | University of Oxford                                           | Clinical Trial Service Unit and Epidemiological Studies Unit, Nuffield Department of Population Health | Oxford           |
| romain bourcier        | France      | University Hospital of Nantes                                  | Department of Neuroradiology                                                                           | Nantes           |
| Owen A. Ross           | USA         | Mayo Clinic                                                    | Department of Medical Genetics and Neuroscience                                                        | Jacksonville     |
| Ralph Sacco            | USA         | Miller School of Medicine, University of Miami                 | Department of Neurology                                                                                | Miami, FL        |
| Rufus Akinyemi         | Nigeria     | University of Ibadan, College of Medicine                      | Institute for Advanced Medical Research and Training                                                   | Ibadan           |
| Rustam Al-Shahi Salman | UK          | University of Edinburgh                                        | Department of Clinical Neurology                                                                       | Edinburgh        |
| Sara L. Pulit          | Netherlands | University Medical Center Utrecht, Brain Center Rudolf Magnus  | Department of Neurology                                                                                | Utrecht          |
| Sander W. van der Laan | Netherlands | University Medical Center Utrecht, Division of Heart and Lungs | Laboratory of Experimental Cardiology                                                                  | Utrecht          |
| Danish Saleheen        | USA         | Perelman School of Medicine, University of Pennsylvania        | Department of Genetics                                                                                 | Pennsylvania, PA |
| Sandra Olsson          | Sweden      | University of Gothenburg                                       |                                                                                                        | Gothenburg       |
| Sandro Marini          | USA         | Harvard Medical School                                         | Center for Human Genetic Research                                                                      | Boston, MA       |
| Steve Bevan            | UK          | School of Life Science, University of Lincoln                  |                                                                                                        | Lincoln          |
| Kristina Schlicht      | Germany     | Kiel University                                                | Institut für Medizinische Informatik und Statistik                                                     | Kiel             |
| Steve Cramer           | USA         | University of California Irvine                                | Neurology, Anatomy & Neurobiology, and Physical Medicine & Rehabilitation                              | Irvine           |
| Stephanie Debette      | France      | INSERM U1219 Bordeaux                                          | Population Health Research Center, Bordeaux, France                                                    |                  |
| Shahbaz Zamani         | Australia   | University of Newcastle                                        |                                                                                                        | Newcastle        |

|                       |             |                                                                                           |                                                  |                     |
|-----------------------|-------------|-------------------------------------------------------------------------------------------|--------------------------------------------------|---------------------|
| Steven Kittner        | USA         | University of Maryland School of Medicine and Baltimore VAMC, MD, USA                     | Department of Neurology                          | Baltimore, MD       |
| Soo Ji Lee            | South Korea | Seoul National University                                                                 |                                                  |                     |
| Agnieszka Slowik      | Poland      | Jagiellonian University Medical College                                                   | Department of Neurology                          | Krakow              |
| Steven Lubitz         | USA         | Massachusetts General Hospital, Harvard Medical School                                    | Department of Cardiology                         | Boston, MA          |
| Stacey Quintero Wolfe | USA         | Wake Forest Baptist Health                                                                |                                                  | Winston-Salem, NC   |
| Stephen Rich          | USA         | University of Virginia School of Medicine                                                 | Center for Public Health Genomics                | Charlottesville, VA |
| Suo Yue               | China       | Beijing Tiantan Hospital                                                                  | Department of Neurology                          | Beijing             |
| Sudha Seshadri        | USA         | Boston University School of Medicine                                                      | Department of Neurology                          | Boston, MA          |
| Tai-Ming Ko           | Taiwan      | Institute of Biomedical Sciences, Academia Sinica                                         |                                                  | Taipei              |
| Eng King Tan          | Singapore   | Singapore General Hospital, National Neuroscience Institute                               | Department of Neurology                          | Singapore           |
| Rhea Tan              | England     | University of Cambridge                                                                   | Department of Clinical Neurosciences             | Cambridge           |
| Tara Stanne           | Sweden      | University of Gothenburg                                                                  |                                                  | Gothenburg          |
| Tushar Dave           | USA         | University of Maryland School of Medicine                                                 | Bioinformatics                                   | Baltimore, MD       |
| Tsong-Hai Lee         | Taiwan      | Linkou Chang Gung Memorial Hospital                                                       | Neurology department and Stroke center           | Taipei              |
| Tom van Agtmael       | UK          | University of Glasgow                                                                     | Institute of Cardiovascular and Medical Sciences | Glasgow             |
| Tatjana Rundek        | USA         | Miller School of Medicine, University of Miami                                            | Department of Neurology                          | Miami, FL           |
| Turgut Tatlisumak     | Sweden      | Sahlgrenska Academy at University of Gothenburg, Institute of Neuroscience and Physiology | Department of Clinical Neurosciences/Neurology   | Gothenburg          |
| Umme Lena             | USA         | Massachusetts General Hospital                                                            |                                                  | South Hadley, MA    |
| Vincent Thijs         | Australia   | Florey Institute of Neuroscience and Mental Health                                        | Stroke Division                                  | Heidelberg          |
| Katie Vo              | USA         | Washington University School of Medicine                                                  |                                                  |                     |

|                          |             |                                                |                                                    |                 |
|--------------------------|-------------|------------------------------------------------|----------------------------------------------------|-----------------|
| Wagner Avelar            | Brazil      | University of Campinas, UNICAMP                | Department of Neurology                            | São Paulo       |
| Will Longstreth          | USA         | University of Washington                       | Department of Epidemiology                         | Seattle         |
| Keat Wei Loo             | Malaysia    | Tunku Abdul Rahman University, UTAR            | Department of Biological Science                   | Kampar Perak    |
| Yoichiro Kamatani        | Japan       | RIKEN Center for Integrative Medical Sciences  | Laboratory for Statistical Analysis                | Yokohama        |
| Yukinori Okada           | Japan       | RIKEN Center for Integrative Medical Sciences  | Laboratory for Statistical Analysis                | Yokohama        |
| Jaeyoon Chung            | USA         | Massachusetts General Hospital                 | Center for Genomic Medicine                        | Boston, MA      |
| Patryk Kubiszewski       | USA         | Massachusetts General Hospital                 | Center for Genomic Medicine                        | Boston, MA      |
| Christhunesa Christudass | India       | Christian Medical College                      | Department of Neurochemistry                       | Vellore         |
| Simone Uniken Venema     | Netherlands | Utrecht University Medical School              |                                                    | Utrecht         |
| Sanjith Aaron            | India       | Christian Medical College                      | Department of Neurochemistry                       | Vellore         |
| Brady Gaynor             | USA         | University of Maryland School of Medicine      | Division of Endocrinology, Diabetes and Nutrition  | Baltimore, MD   |
| Pei-Ying Chuang          | USA         | University of Maryland School of Medicine      |                                                    | Baltimore, MD   |
| Ugur Erickson            | USA         | University of Maryland School of Medicine      |                                                    | Baltimore, MD   |
| Kay Sin Tan              | Malaysia    | University of Malaya                           | Division of Neurology, Department of Medicine      | Kuala Lumpur    |
| Kathy Ryan               | USA         | University of Maryland School of Medicine      | Division of Endocrinology, Diabetes, and Nutrition | Baltimore, MD   |
| Zurab Nadareishvili      | USA         | George Washington University                   | Department of Neurology                            | Washington, DC  |
| Elodie Persyn            | UK          | King's College London                          |                                                    | London          |
| Thomas Jaworek           | USA         | University of Maryland                         | Department of Medicine                             | Baltimore, MD   |
| Eric Ho                  | USA         | Lafayette College                              | Department of Biology                              | Easton, PA      |
| David Spence             | Canada      | Robarts Research Institute, Western University | Department of Neurology and Clinical Pharmacology  | London, Ontario |
| Katherine Kirkwood       | USA         | Mount Sinai                                    |                                                    |                 |
| Lingyan Chen             | UK          | University of Cambridge                        | Department of Public Health and Primary Care       | Cambridge       |
| Marco Nardin             | USA         | Massachusetts General Hospital                 | J. Philip Kistler Stroke Research Center           | Boston, MA      |
| Haley Lopez              | USA         | University of Maryland School of Medicine      | Department of Neurology                            | Baltimore, MD   |

|                        |           |                                                         |                                                                                                         |                |
|------------------------|-----------|---------------------------------------------------------|---------------------------------------------------------------------------------------------------------|----------------|
| Cecilia Lagging        | Sweden    | Gotenburg University                                    |                                                                                                         | Gothenburg     |
| Kyle Walsh             | USA       | University of Cincinnati                                | Department of Emergency Medicine                                                                        | Cincinnati, OH |
| Samantha Speroni       | USA       | Holy Cross                                              |                                                                                                         | Worcester, MA  |
| Chris Levi             | Australia | University of Newcastle                                 | Department of Neurology                                                                                 | Newcastle      |
| Nicole Dueker          | USA       | Miller School of Medicine, University of Miami          |                                                                                                         | Miami, FL      |
| Graham Hamilton        | UK        | University of Glasgow                                   | Research Institute of Molecular, Cell & Systems Biology, College of Medical, Veterinary & Life Sciences | Glasgow        |
| Doris A. Taylor        | USA       | Texas Heart Insitute                                    | Regenerative Medicine                                                                                   | Houston, TX    |
| Susan Halloran Blanton | USA       | University of Miami Miller School of Medicine           | Human Genetics and Genomics                                                                             | Miami, FL      |
| Keith L. Keene         | USA       | East Carolina University                                |                                                                                                         | Greenville, NC |
| Nicole Davis Armstrong | USA       | East Carolina University                                |                                                                                                         | Greenville, NC |
| Francesca Bosetti      | USA       |                                                         | Neural Environment                                                                                      |                |
| Nicole James           | UK        | Imperial College London                                 |                                                                                                         | London         |
| Lawrence Latour        | USA       | National Institute of Neurological Disorders and Stroke |                                                                                                         | Bethesda, MD   |
| Hee-Joon Bae           | Korea     | Seoul National University College of medicine           | Cerebrovascular Disease center                                                                          | Seoul          |
| Thomas "Nate" Person   | USA       | Geisinger Health System                                 | Genomic Program                                                                                         | Danville, PA   |
| Jeff O'Connell         | USA       | University of Maryland School of Medicine               | Division of Endocrinology, Diabetes and Nutrition                                                       | Baltimore, MD  |
| Monique Stins          | USA       | Johns Hopkins Medicine                                  | Molecular Microbiology and Immunology                                                                   | Baltimore, MD  |
| Keon-Joo Lee           | Korea     | Seoul National University College of medicine           | Department of neurology                                                                                 | Seoul          |
| Matthew Pase           | Australia | Florey Institute of Neuroscience and Mental Health      |                                                                                                         | Melbourne      |
| Robynne Braun          | USA       | University of Maryland Rehabilitation Institute         | Neurology and Stroke Rehabilitaiton Unit                                                                | Baltimore, MD  |
| Nicola Armstrong       | Australia | Murdoch University                                      | Mathematics and Statistics                                                                              | Perth          |
| Wendy Ziai             | USA       | Johns Hopkins University School of Medicine             | Neurocritical Care                                                                                      | Baltimore, MD  |
| Meiyun Wang            | China     | Henan Provincial People's Hospital                      | Department of Radiology                                                                                 | Henan Sheng    |

|                        |              |                                                     |                                                                        |                  |
|------------------------|--------------|-----------------------------------------------------|------------------------------------------------------------------------|------------------|
| Xiaoyue Ma             | China        | Henan Provincial People's Hospital                  | Department of Radiology                                                | Henan Sheng      |
| Toni Pollin            | USA          | University of Maryland School of Medicine           | Epidemiology and Public Health                                         | Baltimore, MD    |
| Steve Cramer           | USA          | University of California Irvine                     | Department Anatomy and Neurobiology                                    | Irvine, CA       |
| Steve Messe            | USA          | University of Pennsylvania                          | Department of Neurology                                                | Philadelphia, PA |
| David Hasan            | USA          | University of Iowa                                  | Department of Neurosurgery                                             | Iowa City, IA    |
| Brandon Hancock        | USA          | Massachusetts General Hospital                      |                                                                        | Boston, MA       |
| Christoph Griessenauer | USA          | Geisinger Commonwealth School of Medicine           | Department of Neurosurgery                                             | Scranton, PA     |
| Zhang Li-Qun           | USA          | University of Maryland School of Medicine           | Department of Orthopaedics                                             | Baltimore, MD    |
| Remco Jan Hack         | Netherlands  | Leiden University Medical Center                    | Department of Clinical Genetics                                        | Leiden           |
| Yan Guo                | USA          | Pacific Biosciences                                 | Field Applications                                                     | Menlo Park, CA   |
| Yu-Ching Cheng         | USA          | University of Maryland School of Medicine           | Department of Neurology                                                | Baltimore, MD    |
| Mithilesh Siddu        | USA          | George Washington University                        | Department of Neurology                                                | Washington, DC   |
| Glen Jickling          | Canada       | University of Alberta                               | Department of Medicine, Division of Neurology                          | Alberta          |
| Fahad S. Al-Ajlan      | Saudi Arabia | King Faisal Specialist Hospital and Research Center | Department of Neurosciences                                            | Riyadh           |
| Satoru Miyawaki        | Japan        | The University of Tokyo                             | Department of Neurosurgery                                             | Tokyo            |
| Nita A Limdi           | USA          | University of Alabama at Birmingham                 | Department of Neurology                                                | Birmingham, AL   |
| Hiroki Hongo           | Japan        | The University of Tokyo                             | Department of Neurosurgery                                             | Tokyo            |
| Hong-Kyun Park         | Korea        | Inje University Ilsan Paik Hospital                 | Department of Neurology                                                | Goyang           |
| Ruchira Menka Jha      | USA          | University of Pittsburgh                            | Departments of Critical Care Medicine, Neurology, Neurological Surgery | Pittsburgh, PA   |
| Jennifer E Huffman     | USA          | Boston VA Healthcare System                         | Center for Population Genomics                                         | Boston, MA       |
| Remco Jan Hack         | Netherlands  | Leiden University Medical Center                    | Department of Clinical Genetics                                        | Leiden           |
| Gido Gravesteyn        | Netherlands  | Leiden University Medical Center                    | Department of Clinical Genetics and Department of Human Genetics       | Leiden           |
| Zhengming Chen         | UK           | University of Oxford                                | Department of Population Health                                        | Oxford           |
| Robert Clarke          | UK           | University of Oxford                                | Department of Population Health                                        | Oxford           |

|                          |             |                                                                 |                                                             |                   |
|--------------------------|-------------|-----------------------------------------------------------------|-------------------------------------------------------------|-------------------|
| Chih--Kuang Cheng        | Taiwan      | Chang-Gung Memorial Hospital                                    | Department of Neurology                                     | Taoyuan           |
| Najibah Ali Galadanci    | USA         | University of Alabama at Birmingham                             |                                                             | Birmingham, AL    |
| Joanna von Berg          | Netherlands | Universitair Medisch Centrum Utrecht                            | Division of Laboratories, Pharmacy, and Biomedical Genetics | Utrecht           |
| Sali Farhan              | USA         | Massachusetts General Hospital                                  | Center for Genomic Medicine                                 | Boston, MA        |
| Hye-Yeon Choi            | USA         | Weill Cornell Medicine                                          | Englander institute of Precision Medicine                   | New York, NY      |
| Marios Georgakis         | Germany     | Ludwig-Maximilians-University, Klinikum der Universität München | Institute for Stroke and Dementia Research                  | Munich            |
| Marie-Gabrielle Duperron | France      | Bordeaux University                                             | Bordeaux Population Health                                  | Bordeaux          |
| Olivia Skrobot           | UK          | Bristol Medical School                                          | Translational Health Sciences                               | Bristol           |
| Rozan Attili             | Germany     | Medizinische Hochschule Hannover                                | Institut für Klinische Chemie                               | Hannover          |
| Luanluan Sun             | UK          | University of Cambridge Medical University                      | Department of Public Health and Primary Care                | Cambridge         |
| Yasaman Saba             | Austria     | Graz                                                            | Division of Molecular Biology and Biochemistry              | Graz              |
| Stanley Zimba            | Zambia      | University Teaching Hospital in Lusaka                          | Department of Neurology                                     | Lusaka            |
| Shadi Yaghi              | USA         | Lifespan                                                        | Department of Neurology                                     | Providence, RI    |
| Chi-kwan Tsang           | China       | The Clinical Neuroscience Insititute of Jinan University        | Department of Neuroscience                                  | Guangzhou         |
| Jae Guk Kim              | Korea       | Eulji University Daejeon Eulji Medical Center                   | Department of Neurology                                     | Daejeon           |
| Christoph Nowak          | Sweden      | Karolinska Institutet Care Sciences and Society                 | Department of Neurobiology                                  | Huddinge          |
| Dharambir Sanghera       | USA         | University of Oklahoma Health Sciences Center                   | Department of Pediatrics, Section of Genomics               | Oklahoma City, OK |
| Karen Albright           | USA         | Upstate Medical University                                      | Department of Neurology                                     | Syracuse, NY      |
| Shanshan Sheehy          | USA         | Boston University School of Medicine                            | Department of Medicine                                      | Boston, MA        |
